# Supplementary material
Source: PubMed Central journal article supplement (PMC1203392)
Supplement: plntphys_pp.104.058412_1.pdf [file plntphys_pp.104.058412_1.pdf]

## Motif map of ABA regulated (ABR) class

Significant motifs from ABR genes were mapped on their promoters (600 bp 5' upstream from putative ATG).

### Legend:

p<10<sup>5</sup>    **acgt**  
p<10<sup>6</sup>    **acgt**  
p<10<sup>7</sup>    **ACGT**  
p<10<sup>9</sup>    **ACGT**

### At5g52310

tatttcacatctacttcttttatcttctaccagtagaggaataaacaatatttagctccttt  
gtaaatatacaattaattttcgttcttgacatcattcaatttttaattttacgtataaaata  
aaagatcatacctattagaacgattaaggagaaatacaattcgaatgagaaggatgtgcc  
gtttgttataataaacag**ccacacgacgtaaacg**taaaatg**accacatgatggg**ccaata  
gacatg**gaccgac**tactaataatagtaagttacatttttaggatggaataaataatcatacc  
gacatcagtttgaaagaaaagggaaaaaaagaaaaataaataaaagataataactaccg**AC**  
**ATGaGT**tccaaaaagcaaaaaaaaaagatcaa**GCCGACACaGACACGcGT**agagagcaaaa  
tgactttgacgtcacaccacgaaaacagacgctt**catACGTGTC**cctttatctctctcag  
tctctctataaaacttagtgagaccctcctctgttttactcacaatatgcaaaactagaaa  
acaatcatcaggaataaagggtttgattacttctatttggaagaaaaaaatcctttggaaa

### At2g18050

taaacaattgttttatgtatatatTTTTTTTTTgatagggttaaggattTTTTTctattt  
ttgTTTTtaaatgtaataaaatttgaa**ACaCaTGT**aaatatcgtattagtaaataccgac  
caaaaaaatattgtattagtaaatttgacacatatcgcaattttgtgagctaacaatt  
ttaaaaatcaaataagatgacgaacaaagctctggtttaaactttctcccatcaattttt  
tcattaaaccaaatttaaccaattatttggcctaataactg**gtctacgt**tattaagaat  
aagaacttattttgtggttcagtagaaaac**acac**tc**gt**tcacaaaatgcctagtaagagt  
aaaggacgatcaccgcca**ccaagtgtgttctcggataaacacatggg**aat**cca**gccatta  
cttaa**acGACACGTGT**ac**GC**tcatgatttattaat**GCACACGT**aat**cg**atcctctgacaa  
aaaccataacgaatacagaaaac**acacg**aat**ac**acttccctg**cg**ctataaataagctagc  
acgaaaaaatttaacagatagagacaagacaagcaaacactttcactaatcctcta

### At5g57550

cgaaatcaaaccggaatTTTgcatgtaatttgattgggtgtcgttactTTaaatctTTaat  
ccacaaaacaaaatttactcgatttttagtattaaccgaaccaattatagtttattgaaat  
TTaattTTaattctatcaaattgcatatgtattcttgagttattttttataaaaatactg  
aaaccaactaaaataatagagtt**tgggcgg**aaactaccgtaccaaatttgattgtatttgg  
gtatcatttttgcaaacctaattagcctgaagactgagatataccttgtccactcttatga  
agaaccaatttaacaagggtgaaaaccagaatctctaaaccaa**catggc**atcaactgaac  
cggatcaggcagacttaaaccaaaaacaaagaacaa**GCACACGT**ag**ca**tgaggcaaaatta  
**agcacatg**cttgccttacttcaaaaacaaaaccagctgttcacagctaaaactac**ACA****G**  
**aGT**cacaaacggcgaactatactacaaaagactaagacttgccctccttatataaaacc  
cccaacacataagggtcccaatgaaatgatttcaattctctatcttattgacacataaaca

### At5g22500

gttactgaattctatagctcttaccttgacgactatgtcccaaggagaggaagtacct  
taactataaattctgaacataaattttgtctatcttgggtgagatattatatgacctaaccct  
ttaataagaaaaagtataataactggcgtaacgtaataaattaacacaaatcataagttggt  
gacaagcaaaaaacatacataaatttgtttaatgagatatattagttatagttcttatgt  
caaagtacaattatgcctacccaaaattaattaatgatttcaacaggaagtctgagatgat  
ggGCCGACGTGT agttacggttcttgaattgtgagagatggatatttattatactgaagaa  
aacattatctactaaataaattttcatttcacatcttctgtaatcaatgcgggtagatga  
agaagttgtaatacagatggccaaccatatggatctcttttttggcggttctatatatag  
taacctcgactccaaaggcattACGTGACtcaataaaaatcaagctcttttggttcctttta  
tccaaaaaaagctctgtgttctcttaggttggttgagaatcatttcatttca

### At5g57050

ctaattactttgttgttactaaaacatctcacattgtgctatttttttaataaataaa  
gacctctctcttaaaactgattatcccctaaactatttggttgtgagaaagaaagagaa  
aaaaagttttttgggttgaaattaattgagggagagagagaggttcagaatctctaaat  
ggctgaacgaattgccagaatccaggaaactctgatttttagtcctttttcctcggga  
aaACGTtGCtttttctttttgtgtgtgtttggttctttaattgacaaatctctctcta  
tctgtttcatgtgttagctaaaggtgtcttctcctctaatgagtcagagtttctt  
gtcttcatcttcatctaataaagttaacaacactctcatcaatttttattatgttcaaat  
ctgtctgacttttcggttcttttctttacacccaagcgttttaacaatctaactctgtc  
tctttgaatacttagatatccaacttcaatttctctcctttctcttcccaactttgatc  
ctgattttgggtttttgttaagttcaagaaagttcttttttcttttttttctccttta

### At4g35980

agaaaaaattttcatcatcataattgattataccttttaatacatttttttgccttttat  
gttttctaataagaaaaaaaccaaagtttctccatggtttaggtaagatcctactgt  
taaatagaatttcatttggcaaaaacaaagtcaatacagattaccattatcatagtcatt  
acacatcttaattacttgaataattcttgttttagtgtagactaaaaaagGTGGCAaAac  
aataacaaatgtacaatatacactcaacaaaaagaaattttggatataacaaatttaa  
tatttggataaaagcgggaaatctcctaaaatagttaaaaaaagggttaaacggccc  
ggttcatagtcaaaaagtatgctcctcttgaaacacgcaacGCcACGTcttctatctc  
cgagactccgacagcaaggttacttaacagttaatcaaacactagattcgctttcttccatc  
actaatcttctgactttttctatttctgcccacaaatctttttcaaatcatataaataac  
caaACaCtTGTtcttcttcatcccccttctgtcttctcctccttaaatcaccggcgataa

### At2g47780

gcgttggctgaaatcaaactgtgagattcttaaaaggcgatcgttttacttttatgtcg  
ccgaaacggaacaaattcaaacggtaagccaactatactttgatcagttttgggttggg  
ccgttgacactgttttgtgggcttctcagtcGTGGtAAAcctaaaattaatataggaac  
tcgaggattagggcccaatccattttaACACGTgatgatcatgtaaggtttggagggga  
atatacaaaaagtgatgatgtagcgaacgagaggtccttgtgcttttttgatttacc  
ctcgagACCGTGCCGACggagtggtcgtggttttctgtgcaacagtcctcgaccatacct  
cGACACGTGTgaaaacgggtccattaagagtaagacatctgtcaataggacagctgtcct  
agaggtcactcgtctctcacaatccaatccctttcgcttaaataaaactaaaatggagc  
atggcagcaacaTGCCACGTGgCtaccagtttcaaatctgagccgtccgggtgtgatata  
agtctttttaagagagagagagcgggtcgtttgtctgcaacggcaccagcttttgaca

### At4g34010

tgcagttctggagaaagtgattgagagaaggcaaaaaaggatgataaagaatagggaaatc  
agctgcaaga**tcccgcgc**tcgcaagcaagtgagtggttgtttaaatTTTggagattaaag  
aaccttaaaactgtgaccatgttatttactTTTTcactttcttgcttgacaggcttata  
cgatggaactggaagcagaaattgcgcaactcaaagaattgaatgaagagttgcagaaga  
**aACAAGTGT**gtctcgcttcttccctatcacaattaagaatctcgagatTTTcatatttct  
ttgaggttgattcactgaccaaagtTTTcatgcaggtgaaatcatggaaaagcagaaa  
aatcaggtactgtcttgatttgaatatcctctatgggtggttggttaggctTTTaaactctc  
actcataatgaattacactTTTggacagtatTTTctaagctTTTgagtagaata**GTGTaaGC**  
tataccatgaagtgagacatatcatcacattTTTga**TtTCCAC**tctgcataaagtattt  
aagatttTgtgaatatgTtgcaatgccaattTggatatttcatgagactaatctgacgagc

### At5g15960

gaaaaaacatgaaaaatacgggaggttcg**GCaaACAC**aacatttaacttgcc**aaacgta**  
**t**atctaact**TtTCCAC**cttatacaaggaaccattTTTTcaataataaagTTTTTTTT  
TTTgtcttcgcaaataagagcacgaaatgTTTgccaacgcatatgcaacaaacc**cacgt**  
ta**c**ataattctgTT**ta**cagcca**ta**gagcaagctatattgTTaaagacctaaaaaaactt  
tactataacatatagaggcttcgagataTTTcgaaagactcaacttatataataaac  
tcaaaaagaaaacacggaggcgagaggatcactctcacacagaaagagtcacattatt  
atatcctctaaaaaaccaactaaa**acGACACGT**gaagtcttgatcagccgataaatagc  
taccgacataaggcaaaactgatcgtaccatcaaatgtaat**ccacgtggt**TTTtagatt**AC**  
t**CGTGGcA**ccacactccctTTtagcctataataataaacattaagcccacatctcttctc  
atcatcactaaccaaacacacttcaaaaacgattTTTacaagaataaatatctgaaaaa

### At1g01470

tgggcttatggcctgtggcccatttaagTTTgaccttaatatccatcagaaaccatacc  
aat**acgggtc**at**ta**agtgcatTgtccatatagtgaccgcaat**gc**at**gggag**tactactac  
attccacc**gacgtg**cat**at**ggggggacat**ggtcgg**tcattaa**ttccc**tt**gc**gcatcttat  
tccttacgcaataactTTTTccctctTTTtagTTTTgtataatactTTTccattTTTTTggta  
TTaaatttatcgtgtgactatctaaaaaggtatttaattatctagTTTtagctataactgc  
aaacaaaatatctattTTTcatgaatgatataTTTTgaaataaaatattgTTgtcatgta  
acgaaaaaatcaaaaatcaagcagaa**GACACGT**at**ta**accacgctttcactctc**AC**t**CGT**  
**GGaAaA**cc**ctcACACGT**acacaaaccattataaaatttaattccattttacat**cgaccgact**  
tcataagaacatcgtaatcccatccgTTtatatatataTTccaagTTaaacttcatatca  
tacacacaaacctaaaacaccgaaacaaaaacaaagagatttaacaagaagagttatta

### At4g02630

attgcgatgagggcagagttgcgagcagggatcgtagctctccagccatatttgattca  
actacacacgataaacaattccagaacaaaaatcaatccagcgaagaagacaattatcga  
aatgggtaaaaaccctgatcaattcctgatcttagattcgaagataaaagcaaaagctca  
tagattttactcattacctTTTTctctgTTcttctctccttcttcgatttgatttgat  
agatagatttTgtgtaaatcacaaccaaagaccacgcgcaaaaaaaaaactTgttcaga**ac**  
**acg**att**ca**aattgacaatattaccctgactatacctTTaataacgatactaccctcctt  
aataattgctcattaacagtaaaa**GTGGcAaA**agtgtaatatataactaaaaataatgat  
gagtgcaagtcccatcaaagccagcttgctctctcga**gggtacgt**ttgtcttttcgacat  
ctTTTTctTgtctctacttcagaaaaacctcctgtgatgattattatatgtgaagcaga

acaaaagcaaaaagagagagt cagaggaagaagaagaagaagaagagt cagtgagctgca

#### At4g23600

aataaaaatttagtattaactattacgtcacattaaaatataacttggttttaaattaaata  
taaatttatgcatGACACGgataaccttgtaaagataataacaacgagtaaattcatgaaa  
tcgtacgttactatatttatatttttaaattgggcaaaacataacaaaaaacatgggtggtt  
ttcctcctctcgtcggtcgaagacagagacaaaaaatatttaaatacgtagaatctttg  
cttcttcttgatgctgatgagtgatgagtaatcgacagagttattttgtttcttttgat  
aataaaggagattgctgactctacaagagagggctaataatagcatgcattaagatcaatca  
tacagtttacttaacaagatttaagatcaccgaaggctcgagattcgagatacattatt  
ttctttttgtcttctatggtgatgtaaTaTCCACGtgagatatcaaatgtttagaaca  
atgtgaaaaccattggcaaaaaatgaaaagtggttgggaattttcactatatattcgac  
ttcgtagcaatgagagtttagtcacccaaaaacaaaatctaatagagaaaaataagtagat

#### At1g23200

gaattatattaactgaaatagttaaatttttgctaattggttataactatttcaaatcacat  
tttctgtacgtggattggtcttttcttctatgatatggttatctttcatttggagctctcaga  
ctttctgacatgtggcattacgggaaagggtgtgtgtctctcaaacttcttACaCaTGTgg  
caggccattagccaaatctcatttgagtatctataactaatttgattattagcttgagttc  
ctttcctacgtagttgttttaatttacataaagctctaaattatgttgtgttcaatggtt  
atgcaataagttcgaaccaatggccattgctaacttggattctataacatataatttggt  
cttaattttttatttttttggtcttaattttcgtttcatatgtttatatacaacataaat  
cagacgctttgACGTGgCtGCatACGTGTatacattttcatttatgagattgaaagagag  
tatccatacatttgttacttatacatgcatttatataactctctacttccctaagaaa  
acaaTaTCCACatctctactcatccacattagtc aaagatctctattggtacttctcaa

#### At2g21560

gttatttacaagacaACAaGAGTtatggtaatgatttttgcttggttaaataataagcttt  
atattactaaactattatgatttttgcttgatgatacaaatcatatatcttacatataaa  
cgtaaatacaatcttaaaaatacaacaagacaatggagctatggagtc aaatgaaaata  
taaggacacaaaactatgatttttattagattttcagttcaagtagattcataatttaag  
ggtgaaagatgaattaatttttctggttttgcaataagaacataataactgtaatcca  
attgaaaaaagaaatgggttCGTGGAAaAagaaagcaagcactcagtgactctttataaa  
tactctcattgcaaagttacattctttcaagctaacaaaaacacacaaacaaagagaga  
gagaaaaacagacacacactcttctctgttttttttgctccacaaacttaaaatcaaat  
tctcctttttctctacaacatctttgttgatcttcaaagaagatttaagcttgaagtta  
caaagcttctctctccttcagatctactgtttttaagttaatctttttccttcaacgcaa

#### At5g25610

aaataactcga aaatatactgaactaagttagtagttttaaataataatcccggttggac  
cgggcagtatgtacttcaacttgtgggttttgacgattttggatcggattgggcgggc  
cagccagattgatctattacaaatttcactgtcaacgctaactccgaacttaatacaag  
attttgagctaaggaaaactaatcagtgatcacc caaagaaaacattcgtgaataattgt  
ttgctttc catggcagcaaaacaaataggacccaataggaatgtcaaaaaaagaaGA  
CACGaaacgaagtagtataacgtaacacacaaaaataaactagagatattaaaACaCaT  
GTccacacatggatacaagagcatttaaggagcagaaGgCACGTagtggttagaaggtat  
gtgatataattaatcggcccaaatagattggtaagtagtagccgtctatatcatccatac

tcatcataacttcaacctcagctccttttctaactaaaacccttttactataaattct**acgt**  
**ACACGT**accacttcttctcctcaaattcatcaaaccatttctattccaactcccaaaaa

#### At1g17740

aagtcttggttctttcatgtttcttttcatat**ACaCtTGT**taatgaataaagttgaaaaa**a**  
**ttcgtg**aggaaaagtcggaatctatcttctctgcaaaaataaaattaagtaaaagaaaca  
taaagttatggtttaaagatgctttcggaaactccatcatttta**GTGGgAgA**atcacata  
aaagattggtcgtcaattatTTTTCTTTTattaataaggatgcacatgatgatgaatatt  
aacgtaataactaatatagatgacaatgtatttccagtgcataattatagtaacaatta  
attgaatgcttaaataaatccttttattatataactactttatagtgtttttttgtttta  
attgagacaatgatgatgcacctagacaagaacgctcctactctctgtg**catgtgct**tctc  
atTTTattactcTTTTaccaaacaaactgttcaacttaatacataatgttggtagcca  
caatgtgaaagattaaattaaaactcatccattacctcctgtaagctctatattaaccac  
tttagctcttct**GCacACAC**tcacaacaaccaatcatatttattatataaaaaaagagtc

#### At1g58360

ttagaacactataaattagttttacaagttcttagaaaatgtatctgtaaatttcaaaaag  
gaaaaatatagcatttaattttgaagattttttctacattatatatagataaaaatat  
tgtattttgtactttgtagttacaaaagtcattatatcaacaaatctaaatataaaaata  
TTTTCTATATAactcCAAattaactgtcagaataaaaaagaagaataattattacag  
aatctgaacattaaaatcgt**ccc**ccat**at**gtgggtctctgtctagtccaaaagcaattta  
cacat**cccc**aagcgaactatattaataaacattttttttctttaaactaaaacattta  
taacatttaacaataaaaagttaaaat**cgaACACGT**ataacgtatttttt**acgtatacg**  
**tct**gtttggcatatatgcttaaaacttccattacatacatatacaagtatgtctatata  
atgatattat**GCaaACAC**aaatctgttgactataattagacttcttcatttactctctct  
ctgacttaaacatttattttatcttcttctgttctctctttctctttctctcatcact

#### At1g53580

agtttttaacaattatctcatgg**at****CGTGGtAtA**accgttacttaataacaattataaa  
ctgtaaaaataaaatatttaataaaaataaaaatttgcaagttttaatatataactttt  
aaaaataaatcgtcccgcgatatac**g****cggt**taaaatctagtttgatatttatgaagtt  
gtactcaaactcaaaggtcaaaaccaaagctataaattcatctttgtaatggacctaca  
aatagaatcataacgaagatcctgactggtgacctaaaccgtggagtccaccagacatat  
gacttggt**GTCCGC**aacactttggtttttagttaagattaagcccaatagcccaatataa  
gccatta**GTGT**ag**GC**cctattaagtccatctacactcgaaaacttcatcatcatcttca  
aggtttaagattggcttcatgaatctccaatcactgttctcagatgattgtttaatctta  
tctgataaaaatcatttgcttccataattggttact**ga**at**cg**tg**caga**actgatcaat**CAC**  
**GgGT**ccaccacattgttggtttcaagaagctatta**ACGTCGGC**tgattccaaatgggtga

#### At2g19810

aatatttttcacaataatttttacaattgacatcaatgaaataactaaataattttac  
tactattttaaatagcaaaaataaacgggtatgagtgattttatctaaaaatgtagatta  
tgtgttcccttaattttctaatttaaaaataaaatttttagttttgtcgtttatcag  
cgtatctaaaagttttcttccaa**TcTCCAC**tgcttccggaactcaaagaaaattaaaat  
caaatttttagtaataataacagccgctcact**cacgggg**ctgtcacctaaaagtctatcac  
aatcatc**cacgtc**aattaaatatccttgtggaaaggtctcaagccgctgtccttaacct  
ctgcatca**cacACACGT**cactgtagcttctcactttcgatttt**taaccg**gggtgataaaa

gcagaaatattttaaccatggtttaggttttaaccCAAAGGTGGTTAAGTA**TATCCAC**ta  
ctcagcatcagtttataaagaagtaaagctttgccggagattta**GCaaACAC**aaacacaa  
aaaacaaaaccaactcagacgaatgtgattttttcttcttgagtgaattggtgtaaaaaa

### At2g04160

caggtcataaattatcagtttt**ctgcca**aatatagcatcaatagaaactccattattgg  
gacgcaatgtg**accactg**agcatcttatcatttttatttcaaaaccaccttattacact  
gagcttcctttttttcagcaacaaattaatgtcaaatacaattataaaaatacaataa  
attctgggagaataacaagtatttattagtcattacacataaaaaaccgtattttgggtg  
ttcgtagaaagtgatatacactagtctataatgtgtttcacaaaaaaaaaaaaaaaaact  
tataatcaaaatcaaaatttcatgttcttgaaaagatttcaataatattttttttttg  
aatcgatattaatagactcaaacgacctaccccaaaagatattgtaatttcaatatt  
ttattaacataaaaagat**cgacacg**gtacaaccaaataagttttcgaaaccaataaaaa  
ggaaataaaaaccgatttcttttttttgcaatcccattataaaggagcaacgcacaagcc  
acaagtaaaaagtgaaagtcacaacaaagatacaagaagaagagagaagaagaaga

### At1g35720

aaaaaaaaaactgttaaagcatttttagataatgggtcattgtgttactcctcacat  
gaacattcaataaagttttggatactgtctatctgtatatcgccagaattagtaagaga  
tttcttatgcatagtaggagattaaaaaaaaaatagcatagtaggagatttgtaagaaa  
gaaataagttttttttgtataatgagttctaattggacat**ACGTtGCaagtgat**aata  
aaaaatcttac**ACTCTGT**actctgta**ACGTGT**taaaataatacaaaatggattataat  
aacgaaatctaaacacttataatcttgccgatgattttgtgacaaccaatgaaaccgta  
atgcgagattacgatagtttttatgaaatcatgatttgtgcataaagttaagcaaatgc  
taaataattcataaagtgaagaa**ACACGTGGCAgAa**gaattaataattcgtttgggata  
tttttggtatatacggacag**GcCACGTCGTGTC**taaacctcttagcctttcctttata  
agtcaatctt**GTGTCGGC**ttcgact**cccacat**acacaaaacactaaaagtagaagaaa

### At2g22470

taacagttgaaaattttgatagacatactatatatgaatatgaacttaataatgacca  
tttttctgataatgttaatttactcgtaaacgcgttat**TtCCACG**aaacattaggca  
aaactcaagtttaatttacg**ctggca**attgtaa**g**gggt**ta**accaaaaagcaattacgca  
gagtcaaatcataatctaaaaaccaataataacata**ACACGTGT**Caataacttaactgatct  
cagaattaacatcgtttaagagaaa**ACACGTGGCAgA**gatctgtgtatccgtttgggtgct  
cttcatgtagatgattcttcaagaaaacttcaaaaact**caaACACGTc**aagtttaagaaa  
gaaaaagacaacaattattttaaccgccattgaaaagctaagccatggtgtattttg  
tatgtggttcgcatgattagtggtcacaccaataattaattattaactatttccaacat  
cgctatataatagagctctcttctctcattgttctacaccatcaacaaaaataagaaga  
gtttataacattaaacagagagagtttcaagattcagacaaagaagagataatctaaaaa

### At1g70300

ctttttctttcttctcaaacattctctgtttctcaactcttcaactttccagtggtaag  
atttgaatcatgggttttctcaaatcttaacttttcacaaaag**cccacat**ggaaatcga  
atcaggaagtatcaaaacgccaaggtaagtcacatcagatttgatcaciaaagttctta  
cctttacgaaaactctcttctcttctcctcgtaatcatcgatatctgattttggtgattgc  
agaaggaatcatggagaacagtattaacattagcgtatcaaagcttaggtggtgtatagc  
gagacttgagtatttccctctatatgtatacaaaagcacattcgcctgaagacattcatc







ctgaaatatgtggttttgcgataactaatcatcctatggaatacctcatgcttcaaaagcaa  
actcaaaaaacaaatgctctcttttgcattctcctaaagatttcctctccagaaatagca  
cttttcagtttccaaattagatgacgagaaaaatcaaaagtataaaattacaaaataaag  
accgaaacgaagacttaagctcaagacttggtgaacagaagtcacACACGTGTagtGTGGaA  
aAacaagcacaagACGTGTCtttggagtttgtatataaccgttacagtaaaaaacctctt  
ctttaagtaacaacagcaacaacaacaattcctaaatctctctctctctcaccatcaa

#### At1g23040

atacacattttttcaagataaaccatttagtacaacaaatatagtatgaaaattacatac  
agttatattagtgaccactataatatacctctaaaacatgtataaattaatgtatagtt  
taagccttttgttgtggtggacaacggtgggattttaatcgctaattaatgattctacac  
aaaaaaaaataaaaaattaatggcgataaaaacccaaaatagttcatgaggggatccacct  
aacatgaaaaaatacagaccaattagtggaaccgacgacgagtagtgccttaactaac  
cttcttccctaatttatcatttacgttcaactagtgatacttttatttaagtataattt  
cgtttaaaaaatgactagaagcttacagaaaaattgttatatacacaatacactattta  
ataagtctatgactcccatgacttgacttacgtaacgagaacgcattcatcacctc  
tcaattcattttcacgtctcctcttaattttcaactctttaagctcacatatatacaaa  
actctgtttttgattttctctttgatcaaaatcaaaaaacgccgatcacaagttcacaac

#### At2g16990

ttgaagtgctttatttgaactgatccttattttcatgcatgtgagtgatatacaagttgt  
actttgttgttttgaatgcctagaaatgacaaagcgtgtgggaatggacataatcgtt  
tttcaaaaattgtgggaatggacatgatccttatttatggtttgtacgagcggataaat  
tttattttaattacgtaatcgtctggatttatatactttaatgcagattgaaataggg  
agtaaccaatttttgcatagtccttaacttcaaactcgatcgtagttattacaaaatgtca  
cataattcgtaatgtgtaattaaaaggactcctacacaagagatggtgactaatgatc  
gaGTCGGCagaaaaataccaaaaaagtcctcaaaagtcgatgtgatctcccatgcttca  
accgaatttttggataaagaatagattggaaaaataTcTgCCACattgtagtttttca  
agtaagctttctttgtttgttcaataatcaaaagcaaaaaacaaaaacaaaactctcaaca  
ctttttgtgtttattttctgttattttgaaatcgaaGTCGGCaagcataggctaaaagggtg

#### At4g37980

tagacttgccaaaggggatgttagatatcgatttgtcattgacatttctaatacattggc  
tgctactcgatcttaattaaagtcgatgttctatagtattcaaaataatctggatttca  
atcccacaaaacttaaggatataatataatataatataatagttctattttatataaatgg  
agtatagtcaaaataaatatgcattatcaacgatataatagttcttctattacatagataCGT  
GGgAgttcaccacaacgtagatacgttcggttgaacaagtcatttcatcaatgcctctt  
ccaaaaaaacaaattgcattattgatgaacacatgcatcattatcaaataggttggg  
taaaatgaccaagatgactaaagccaatcacactactaccagatcgagtaaccattaggg  
accattaattcacgtggacgtagtgaatatggctcttgtgaattaatgagtacgtaatg  
tcctcattcatatatggatcgggtccacaaacatttctctgtataaaattctacatctttc  
ctctcattattatctctacacttctcatctctcaatcccattcgcttattattatccat

#### At1g54100

attgttggtaatcgtttagtgacgagattgaaatcaaaaggttcaagtggtaaatcgttttc  
tcctgacgcaaaatcgaaagaaaaaagatcggtagcgtgcaatcctaatacgggtgacctg  
gaaaccaatagttgattcgtttttagtggcggtaaaaccgggttgatgaacaaatattaa

tgggcctggcccatcacgaggatgatCGTGGCAatgtcgatgataacaacaactcctctat  
tcgggtttatggtgaccgcgaaaacgaaagcatagGACACGTGACaCaTGTgatgtgagt  
gaagccaaaaataataatattgggaaaggatgaacacagcagctcagctttcgtcttctc  
cgtcaatccaataaaaaaatcagcaaccggtggttggtttttaagctttttttacaaaaga  
cgtACACGTctctctctcactccctctttaaagatcagaagctcatttcttcgatcga  
tcaaccattaggtgatttttttctctgatcttcgagttctgataattgctcttttttctc  
tggctttggttatcgataatttctctggattttcttctgggggtgaatttttgcgcagaga

#### At2g23120

ataTcTtCCACaattaattataaatgcccgtcctctgattttctaccaattaaagaaga  
atcactaaattaacatggtctagctcaaaaaaaaaaacatgtaatagtctcaaggatg  
ttctaaatgaaaaggctcaataaaaccaataatgaatcatcaciaaagctatgtcaacg  
aagacaaaatgcaagtgtggatatttttcagaaactgctgtaaaacaccgtgaaaatcatc  
ttcttcttttttttttttttgggtcaaactctctacagagtttatcaagtgatttttaccg  
gtacctgtttttccttggttgggtcaactcaattattcgccttaaacaccctttaagaaa  
agcccactgaaaagcctacttttaaattcaaccaaaggccataagtactacaGCCGAC  
atcagcagacaacaaGcCACGTcgatctcgaggaaccgctgaattaACGTGTCggaatca  
cacgagccaccgtgtactagatagctccataaaaGCagACACatctcatgaagcagaacc  
taaacctttaatagcaaacgaaaaataaaaaagaagaactaacaaaacaaaaaaaaaaa

#### At2g23220

cgtagagatttgtaatctatttctattcattgtctaacatttactagaatattaacagatt  
ttctatttagtattttatacatatctcacacaataataaaaaataaaaaagagatcaca  
tttaaattgataacatgcaattaaggaatgcactttggttggttttcaatcaatttacg  
ggtaaaactaactctgatactaaaaatctctgcttcaataaaaaataaaaaatagtaca  
tgtttttggttacgaaacaagtttcggattctgaaatagtgatgatacaataaatttgtag  
ttaactacaatgtattttatataatcattattttaccgccacattttgacctctcatttt  
tttgggtgcttatttttcttaacttagctgaattcttgaactcaaagatcttgaatagc  
tctatgctacttggtgctggccaatctgaatttattaataatggttgatataatACACG  
TGTttaattgcatgggacgtgaatatacttttagtaacggGTGGgAtAaactccatgaca  
ataccaaaatttgaactctcgcGCTtACGTtataaactaagctataacttctaaccctcc

#### At3g19100

ttataacctccctagtttaattagtaataaaaatatttaatttagtagtatcacaagatgg  
agctttaaaagttatctttaattcccacttttgaaaatgataacgtccataaaatacattt  
caaacggttttatttctccaataagatatcaaaaagacaatatcaacaacaaaaaagac  
aagaaaaaagacaaaaaataatgatagataaaaatacaaaaagcaaaaagaaacgtatagt  
attgcttagagaaagaacaaacatattgtgaattaaaaagaaaaaaaagagggacaaaa  
gtagaaagACGTGGCAaAagcaactaaatttcgaccaatccacatctaaaatctaacc  
ttcttcatcagatggaaggaagctacttcaccaccgcagattctgccatgtggcttctc  
tctcttctacagctcacttcttctctctctctcttaactacattgaaaccaaacc  
agagtgttcaatgtcattgctgtgattctctttaaagtccagacataactcccatatctt  
cttcttctgtctttttttatttctttgaacgggagaagaagaagaaggagaaggat

#### At4g19810

accatacttgaagatgtgatttctcaaaaactaaatagtagtatcaaaattggtttgaagaaa  
aataatattcaaaaattggtaaaaaacatatttaaaaaaaggcagtaactctgtagacaga

gactctccacaaccattattaacccaACACGTcaacatgcatggaaacttggcagcaacat  
acactttcactaatgagtcattaccgctattagtagccattggtttcttgttagacaaga  
aatcatataatatacgattaaaattgatatataacaaaatctttcgtaagcaattggata  
ttctataggatACGTgaGCTgaatattcaactttgatataaatgaagttgaatatgtgtc  
tcttggtccttgccttcgcattcatattacACaCTTGTgtggtgacaaaataaaatgcaa  
aatTTgccccactaagactttttctcgttttagcaaaaaacaaaactaagacttttct  
ctttcgtaagatattattcatagattttctcattttcaaagttgaattacgtaagaaagta  
aatatactttttcaataaatagacaacaaccatctctgttttttcacagcaactcgaaaa

#### At2g02990

tctatcttttttgtcatctgaaattattatcgctcaaacgaagtaattctgaggaaagt  
tgtttacaactagttatttccattattgtctacttatataatagaattaaaaaaaaattat  
tgcttaatgcaatttagttagataaaaatcattaaacttaatagattatataagttaga  
tatcaataattgggcttgcttaaaaacataaaatataaaatattattgggcccgttacgtgc  
atacaaaacgaaccttctaacaACAAGTgaacgttacgacttcaaaattaaaaaaaa  
acacaacaactatgtcACACGTaatctcatatgattcagattccaaggagaacaaaatt  
aaaaacaaatctcgtaaacatacatacacttcacataaaacaaaaggtacagtatatacc  
ataaatctccgagattctttgatgtatctgtccatttctatttacacaaactaggaaa  
ctgatatctctattcacattcctctgattctattttctctttatataattcaccatt  
aacatctcaatcttataaccctcaaaatcacaatcttctctttacaaaaaactttgaaag

#### At2g46270

ctctttttcgcctcggtttttttagagagagagaaagatgaaaatgcgtttaattgctgt  
ttaggttcgaattcgcgatttaaatttctgggtttctctctgttttaagcttcttctct  
tcatcttctGCTtACGTtcttcttcaaggagcttctcggattcttgtaggtattgcgtaa  
cttaaatgggttcaaatagagattggttggtcgaatagtttgtgatttggtttctctatc  
attcattgatcttctaagttttgtgaaaattttgccatttttgatcgtttgctttgcat  
ttacttgaattgaatgaaaaattataagttttgaatttgaacaaaaacagctaaagcgta  
gagaagaacagagtttcttttttgggtgcatgtgatgtttcaggggtagaattgtcca  
gtagtgtctactttgttgattccttttgccttctcctgaaagtttctgaacataggatgtg  
agagagaaatactattttacccttctctgtctctataatttctcacacaacaacccatc  
cccatgattttgcgaaagagtcattgttctcttgaGTGGgAaAccttgaaaccattct

#### At1g76180

tcttactctattttaagtttgaatcagttttctttaacttgataaacccgatcattgaact  
acaaagtcacataacaagattaaaacaaaacaaaaaacttatgaaagtctaatttta  
aattaaaaacagtacacgccttgaacaaaccatttagtttctactacttttgaaaa  
aaaactatctagttgccattcttatccattatTTTTTaTCCACtaaattgatatcagat  
cACGTaGCaaactattaacaattaattaatgaattcttcttaatccaatataactttat  
ctaattaacagaaaaatgataattaacgtggggacgaaggagaagatgccataaaaagcg  
ggtcattttgtaatttcatataattagatatatgtttttaaattgcaaaaaaaagtgta  
caaagagcgtgaaatccgcgggtggcttgaccctcccgagtcctcaacactatataaca  
cactttcttctaatctccatcacctcttattttcatctgcttttgaatttcaaacctt  
cacataaaaaaataacttttgaatccgtgttctattcatcgaatctttttccgataacta

#### At4g17550

cagcaaactctcagttactcggagaaaatggagggaagacaGTGGaAaAgagccttatct

gcttttcgcttcctatTTTTG**GCACACGT**at**GC**catcgc**ACGTGT**gaatTTTctttatggg  
ccgTTTgttattgtgggcctTTtagtataatcaatattaataataatagatagtactatgat  
ttataaaaaatcaataaaaaga**GTCGGC**taatgacacagtcTTattatgattacataaac  
ctataaTTTgggcccaccac**caagtcggc****CGTGT**gg**GC**cgtcgcttcatgcgtaccaaag  
tggtcac**CGTGGc**Atgacaactgtt**gttctgccc**TTTTggctctaccgtaacaaatag**GAC**  
**ACGTGTC**gc**gtctt**cacagtttatgtcgtgttctatctctctctgtctctctctct**cc**  
**cgcca**atatctctctccctTTggctctctctctctaatcgctctctctcaatcaaatta**a**  
**ttcgtg**attctgatttatcaaactataaaacaaatggattTgggtatttcattTTgatcc  
gtaaaggTtgattctTTTTTTTTTTTTTgttatcattgaaaattTTgTTTgTTgtgagaga

**At1g62510**

aaaaaaaaagattcataaTTTTattaAAAattatagctgaacttactggatgTTTTtct  
taagaaaactggacaatatatatt**ccaagtggt**atatgTTTTatcttatagaaaag**ag****GTG**  
**GgAaA**ActaaaggTgcaaaacttcttatttacTTTTtaacaaaaaaaaaacttctt  
attaccataatatacaaaatggacaatatatattccaaTTTTgctTTTgtcaa**TtTgC**  
**CAC**cacagagttatct**agcacttga**atttaatcatataaattgTTggaagaatcttctcg  
aaccagTctagaatcagcactaacatgctctgTTTtacacaggacattcatatatcaaat  
aacctctTTTTatcagtaatcaaaaataattataaaccaaaaattcagaatttcaccgat  
gTTTTcttaaataatcacatatatgaggTcataaacattctcggcatgTccttcaaact  
actataaaagcaacttcgaa**ccc****ccat**cttctccaacatcccaattcacacataccaa  
agaaaacagTactgTTTgTTTTTgaaacctctcctctataaaccaaaagTgagattaacaa
