# Supplementary material
Source: PubMed Central journal article supplement (PMC1203392)
Supplement: plntphys_pp.104.058412_2.pdf [file plntphys_pp.104.058412_2.pdf]

## Motif map of ABA dependent (ABD) class

Significant motifs from ABD genes were mapped on their promoters (600 bp 5' upstream from putative ATG).

### Legend:

p<10<sup>5</sup>    **acgt**  
p<10<sup>6</sup>    **acgt**  
p<10<sup>7</sup>    **ACGT**  
p<10<sup>9</sup>    **ACGT**

### At1g09500

acttaaccagtagttgtccaataatthtagttttccaaaatgaaaaattattggtgtcatc  
tatttttaggtgtttttagttcaatgtggattcctcgtcctaacaatacttgacgaatata  
tctagactataaaaattggttatgagttctactttttttgtttgatgaaattatcaaaatt  
tggtatatttatttatttattctcattaatthgagtactaatttttaattatttatact  
aaaaacaattactaagatacaaaaatggataagagcatgggtgtatagatatttaatggga  
tagaatatttcccataattgtatgtgtgtgagagggtttgttttcgtaaggaaagaaaca  
aaaaccatttgaccaaaagaaaagcaaaagaaggcaaggaatcaacaacaaatggtgcaa  
ggcagaaataat**ggacgt**tatgttaatgtag**TGTCG****CACACG****Gac**ttaaaagagacga  
gtc**tgcggtgt**caactaaaaatgtatgcaactataaaaatgggatttgattatctttta  
gta**CCgaAGCC**taccaaccacatgcacactaattctactcgc caaataaagtgaaaagag

### At3g12500

tcaacattgatcatagttaaatatttag**ACACGT****C**Tatttttattttctccacggtatac  
atthttcttgactattcatgcaa**C****CTGTG**atcttgtcttagatatagtcaagatttggt  
tatacatcatagggaaatccgaatatgtgtgtgtttgattaatttagtgcacactagctc  
agatcatcgatttagtccgca**actcgagt****AaACGTGT**ttcagaccacccaaaattttacg  
acthttgtgtcccactatctacgtcagatagtaactttagaacaaaaaactcaaaaagagt  
gtaatttgttatgctthttggctctctaaaatttgattcttctaccaacatttagcacag  
thttcatacatagaaagttctcattacttggaattaacatgataatcccccaaaaaaaca  
atcaatatctaacctagcaacaatgacggaaggaaaataataatcaaaaacaaact  
accaataactgthttgttcc**CC**at**AGCC**acactccatagacatacaacaataaactatg  
gaaaagatagaatttgatgtgataaaacattcattaattggatctatatatatctttca

### At5g66400

gtttggtaaaagttgagtaaattttgtttagggcttagtttttagtccatgggctaattagt  
aagtgatttacggccca**CACAT****GaG**cccaaatgthttcagaccagccaagthttcttcaa  
thtccccaatcaacgacgatg**tacgtgt**gtatgaaaatca**T****AaCACG**acgcacgcctt  
cgaggaggagcat**tacgtgt**cctgtagctacgataatgtagtaccgccacaaagaaaa  
ggatagatattthgtthttccagcaccctgtcatgggattgata**TgAaCACG**taacttgga  
tcgacatgaaagctcaaaaataaattcaatccgattcctthtagtgatcagaagthtcat  
thtaatacga**ACACGT****A****Tg**ggcgaacaccac**G****CGACA**thttctgctg**ctg****ccacgcgt**  
**ca**ctthtccaaatattgattcattaactaatagttgatccatataccgaaaccggactata  
aaactatcttcaatgcgttaacgaatcttcatcgatcaactcatcaaagtctaataatca  
caaagaaagagthttthtaactagcttagctcaaagthttgcttaagacaagaagaaca

### At3g50970

atcttttaacacccaaaaatctgaaacaacagcatgaaaaaagcattaggattcagagata  
aatgagagctaaagcttcaaaatcatacctttttcaattccttcctgatgcaagaagaa  
aaataaaaaaacacagcttgagaaatcgaaatcaaagcttttttcttttactaaca  
atctcaaaaaatcaaaagatgaacaacaaaggtggaagaacataccaacgcacatcggt  
tttagttagttaaagatatgcattattgggcctttcatatctaaaggccacaggccc  
atataagttaaaattacgtcggtcgctaaccactactacaccgacgtcttacttgccatg  
tgtgtgtgactcttaatacgaattgaatatattacttttacgaTGTCTGgCcaACA  
CGTATtgagtaaataatctatgtgatgaattcctatccaaaatgaaatttgcacatc  
tataaaagatcattcaagagatcattaatcttcatcgatcaaagctcttgaatatttcat  
ctatatatacctaagaaagaaaagagttaaagaagtatattttcgattcaaagaagaaaa

### At3g17520

catcgtttgcaagtagtcttccattttgctagggacttcgcccgaaccctagagagatt  
tccgattccaAatCGTGTggaagatcggaatcatcattttctttctcattgtttttgat  
atgatagctggaggaagaatggaagatagcgtagaagagtgtatagaaattagggtttta  
cttacaataagcccttactattcattgaaaagctcactaaactgtttatgaaaagccca  
ctggttattgtatacaagcccattagcttcacagatgtgtttcagttgaagcctctcttt  
gtttttgcgagtcggttttccgcaaaaagcaatcgcttgccctgctgtgtttgtgtgAACACG  
TGTcaagaaccacTAAACACGaATccaaaatcgagaagccaaaagaagctggctactcgcc  
acgtacttagccacgcgctcctaaacctatctctttttcaactaatacataacagagaagc  
aatcacagcaccattcctcggagaacacatcacagtaaacagaggttttttcttcttct  
gaaacttgatataagttatataacatataatattttgtgttcgattagtgtaacaaaa

### At2g19900

ctctaccCCcaAGCCttggcactctacaacgctcgtttacgattatgccattcaggaaggt  
gttgcgaaatgtacatttgccctggaatggtgagcaggaccggtcctgtgcaaattttacctt  
aagaaaacgaaggataaatcagtagtggcttcaacgctcgtgcttaaaaagcttttgggt  
tgaacagacttacttgtcctggtgtgtcttcatgtatcataagatgagcttagacaagt  
atctgacctaggtaacgaacttataggcgaagctatgtggtgacttctttgtttaag  
ttataacttaagatttgtcatctagtgtacaagtaattcgtgtgtatgtttgcttatgg  
aataaataaagaaaactaatgcttatatttaatttcaattaattgtacgtggcactttca  
gagtcattttgggtgtacaaagctgtcttcttcagtgtgacacctctctgcacctcaagc  
ttccatttgtcttttccagaccttcttctttccattaagtttcttcttcttgtgatccta  
gaaaaatctacttcttttctgctttttgtttttgggattgttttcattgatcctttcaaga

### At1g05340

tctttgtagtcctgattttgaatatttctgtttttagctaaatcagctccaatttttcccag  
ttatcgtttgcgaattcatattactgttaatttagttaacttccgaagactattagtac  
atgattcttcaacaaagcaataaagaaaagaatcttgatgtcgttctctcaacaattca  
acaaaacttggctcgcagcactcgaccggtgagatggttgagaagtcagaacacCACAC  
GTCTGACAaaagcccgcaccacgcacgcttttctgctggatataatccaaattacttta  
cagaaatcatttgtattgtttgttaataaaaactttgaaccactttgattactatattat  
ttttttggaatttattctggtagacttaatgttctatcctccacgcggttctcataaacc  
gacttggcttctttatttttctttatctttctctatatatttacacacACACGcaTtg  
tgcagagatattcaaagattagaacattccttgatagatacaaaaaacatttttccagaca  
caaatcataaaatctttgccttagtagatcaaagttctttacattaatcgtagaaga

### At4g24000

aaatttaacttacttaagtgtagtagtatatgtagtaattttctcaactcgcgagcaaacttc  
agttaacttgattttgataaaaataaataacacatcaattatctgaattcttttttaaaga  
aacaatatttcatagaattagttttttttcatttttagaattctaattgaatattacag  
aataaaaacttttacttactaccacacaataatagactttaaagttagttattgtaagta  
gaatgtattattttgaagttaa**AatCGTGT**atttatcgtgatgtaaaaatttacggttct  
ttcttataaactagtcaggctattctgggttgaactacttcac**ttCACACGTGTc**tttt  
ggagaagtagtttcattaataaacacttatctttaattttggcttcaacttttcaaaggc  
acataatgatcacactgtactgtatcatcttatctcataaatgagaaactcgaccataag  
aactgtctatagtggtatattcagaaaagttatcaatagttcaataactaagaaaccggc  
ctatatatatatatttggtggtcactaattttctccaaaaccagttgcttccgtaaaaag

### At2g45570

ttgactggaagcttcaaaacgg**TGTCGtC**cccggaaacattgacatgagcgagactttcg  
gtcttaccttacacaaggccaaatctctttgtgccgtaccggtcaagaaacctacaatat  
cgtcttcttattaataatcgtatcaatataaag**ttcgtgt**acggatcaatattaataatt  
gaagagaatgaaattataaaagatactgctttttatggtttcaagtaaaaatgttaatt  
agaaagtcaagaaagaggaaacacaatgcaatttgataagggtgttttatcgtctccggga  
ttgaattgcgtaggtcaaaaaagacatttgccatttgatatacagacataatcactcat  
tcacggatacgtat**CtCtTGtG**aatgggt**gtcgg**caattacaactttactgctcggctt  
taactgacaagtggcgcctcctggtttcattcagaccctaccggtaggatgtaatttgga  
ccataagtaagaaatatttgtaaatatttact**ACACG**a**T**atctttacgtatttaagtt  
ggcttttgaagctttgataattcactcatttgaaagaaaat**acttgag**aaaaatta

### At4g02360

tccagcacaaaacccaaaacgtaagtacgatcccgtcctttgtgttaattatatgattgc  
tttgtatttcattggttgatgattcgttgggtctctcaaaaagaaaggcaaaaaaaaaaca  
ctaaaactgatttcacccaatattgtttttttttttttttcttcttccattaatagcat  
tttcgttaatgagttcaatagtttgattttgaattgcaaagttcatgtcactgcagcctt  
tcactatgccgtagctttttaccgcattaagtcatcaatcggatccttagtacggtttta  
gttacgatcatgaaatagtaaaatcagtcagtggaatgcaaacttggtgagtttcttt  
atccaatcaaggttgggttgg**TtAcCACGtg**atcgtcgtttttcccta**TtAACACGTGT**  
**G**ctctctctgtcaatcaaatcgtcaccgtacatctaatttgcatgggtctctcatcagac  
agtccagaacacacaaaacacctaacaactgttttcgtcttctgtacttaatgagacactt  
caaagcttatgctaaat**tagACACG**a**T**cataagagcaaaaacttaagaagtaagaacc

### At4g02280

aagtaatttatatagattagaggcccaataaggttcacgtaggcccaacatattaaaag  
taactcagaagagatccatcaaaattttgattcacacatctgtttaggaattaaaaatat  
tatttgatcggttattcattccttttcatgaaatcatgcaaaaatcaaaaatcattttt  
ttctctagaaacta**cgtggcg**agaaagcagagcaccagttgtcttcttgctctgattatc  
tcgttgaaaccgctttcaaagcagagcaaaaga**GaCGACACC**gg**AGCC**tccactgcttta  
cttttcctttaaactgtgactgctttcatttatataataaaaatacatacactctcagagt  
cacatgtactctcctctaaca**TaAaCACGt**ca**ct**ttgtagcgaacagatcaagaaaa  
gagaagatca**aACACGTcT**tcttttctctctctctct**TGTCGc**Ctaaaattccagaatc  
actctgctttttacccttttaataatgatttttcttttagtagcaatcgttgggtgatt

cgaaaaaccaaacttttctcggactaggattctagggtttagtgatcatctgaatattc

#### At4g34650

tccagaacaaacagagtttaagcatggtttagtctaaaacatggattctattttagtta  
ctaccttcgttatctAaACGTGcatttgttcatctatttttattccttggtgtaaaagtt  
ctttctttggttagttgctgtttcttctttcgttctcttttggcatggtttaagattaatt  
ttaccaacaacaaccagataaaaatccaaatgcaataagaaagaaagaaaaatgacaatcg  
aagactgaaatctcttctttcttttaggtcggcaaaaaagttcttcaaagtatataaa  
acaaaaacatgaatcaagattagatttatcttttaacgttaagtgtgtagcacgctgca  
agcaatttaaatgcaaaaaatagaacatagttggaccagtaacatgtatcacctgggcaag  
cttaagagcaaggctaatagcgattctgtggaagtgaaggtatgcaaaggcctgggggt  
ctattgatttattaatagggccatatttgttgaattatagcacatggcctaccattttgt  
tccccaacaaatcctccattgtttcaaacgagttctgtttttctcctctgtttctaaaa

#### At4g31860

gtttgatataatcaatttactccataagactttgaaacatataatacagttgaaaattgca  
atacagctaaaacaaatcataaagagtcaggtaatacattattgtattagtgtaagtaa  
aaatagtggtgtgtgctggcaagtaagagaacacgaaacaaaatcttaagaactttcgttg  
cttttctaaggcaaaacaaaacagactttttctcttcttcttcttttggggctacgaca  
atctgaatttgatcccaaatcaaaactttcttcttcttcttcttcttcttcttcttctt  
tctcctaccaaaaggtctttcctttctccagccagatatgtgaggaaaccaagcttctcgt  
acaacttcatcacctacttcttttgacgttttcaaactcttggatgtttaaaactctta  
tcgattcagccctctctgttttggtttctgtttgtagattgatttcttaattagctctaa  
aagattaagatCACAGGGtccattgtcaaaattctcttttgattttgttttgtaatca  
agaatagtttcttttttgattcatgaagaaatgtctaatttttctcgttgcagagagaga

#### At2g33590

tggatgaacactgccaaggctaaaccggtcgcgagacggttaatctgatggttgggatt  
gacacatcatgcggctgtgtttctcCACGtaaacatttgagaccgctcaaatatattg  
tgggcccggagaacattgttttaccatatagggcccatagactttgaatatgtgtaggtaa  
ataaaatacaatctgtggaacaaaaatggcaaaaatatttgaagtacgaggattgggta  
acaatttgagcacagaaatacatttggtaaacatctgagcatatcattcatatcatatcgc  
tgtcgaatttgaaggaaaaaaaaaagactaaggaagtggatatattggatgaatgctgatg  
atgagaaaacttattattatatacgaaaaatttactaaagacagcaatattccaaaataa  
tgatagggaaagattctgagatgggtgtgtggcagtggtgagcactacagatgggtcaaac  
agtagcataccacctggctatttggacaaggacaaggaagaagaaaaatcgagaacat  
cttctcagccgattttagtaaccatcttcttgtttgctccgaacaatcaagagatcgaaa

#### At1g23800

ctataactccgaagattatggatgggtactactaagtaactaagtaaaaataattctaaaat  
aatatatagaatgaatgattaaaatgatattgtagtattattagTGTTCGACACGAGTt  
tgatttgaCtCtTGTGtaGACGACAagtggggaacgaatgtgatatttttattcctgaaa  
tggttctttcttattgttctgttaaatgcgaaatcattACCGTGTGcttccataaacagag  
ttctcacaccaatacaaaaagagaccatcacctgagaaagagaagaagaaaaaaagtt  
tagccatggcatcaagaagagtttcttctgctgctctctcgtcttttcatgtctctctcac  
gttctatcttctctcttagaggatctaaaatgcgatccgatccattttgtagagccattgc  
ttctctgtcatagttatcttgataatgatcgagatcgttctgttttcttctctgtt

actttcatacggatcaatgatctccgagtttttcggatthttgtggttacttgtc gatgga  
tttgatgatcttgggtctcatttagatcgaatctatgcgcttcttgthttcttttaggca

#### At1g20440

tgacacaacatcaaattcaaattccaaacaactacataacatatatgccaaagtccattga  
aactctttaaattatacatctgttatccttttaaatctgataaaatgcaatacaataata  
gattaaaaggatgtacttcaaccacgtaaccatagaccattgattaatccaaaacaaaac  
catagaccatagttcgatacagcttctgttgataaaaagtacatgactatgcgattatcta  
atattagtttaactcttcatctatatattaaaaacatatatcgthttaaattaagaaaaa  
gtggtgatactgatcatgatattcatctaccgacttcaagaaataagaggggtcatta  
tacaattcaagaaataaataatccatctttttggatcattttaaaataattaatcttta  
cagcgttacctccgcggtggcctggacccttctcttgacactataaaaaccccactctct  
cttatctcatcacaacattactcattcacaacacatcttaaagcaactacacaagtct  
tgaatthttctcatatthttctatthtactatataaactthttaatcaaatcaagattaacta

#### At4g33550

aaatcacaaaaaatattcgactthttcacaagcatcggatgcatagttgthttatthtgataa  
gggtatctcccatagctagttaaaaatgthtttaatatattcgthttgggtaccatagc  
tacaataatcatattatgcagagatcatcgaataacatcacataaggtaagaaagttcat  
gtaaaaagaaaatgcaactaataatcattcacaaccttagcagtagattagcgcgcgaaaa  
ttgatgtcaccaaatthtaacaatctthtaaatgacatctthtaattaacgcgcttcatc  
ggagacaaaatgaatthcatcaaaaatgagtcactaaactatthttcaaccactccacta  
aaaaagthaaacctcattcaaaaactgccaagaaacattcccaccaacaaaagataacaa  
ataatatagactccctcgccttgthtgcttcccactacaaaagtaacaagaaaaatthgta  
caactaagcatagthtaaacgthtatgctatataatacaaatctctcgtcgggaccaaata  
thcgcattcatagatthcattacaaatthaacgaactatthcacagaaagaaataaaaacgag

#### At5g13170

gagggcgataaagcctaagaaaaatgtacaaatcgtaaatgtaaatctagtgatgatttctt  
ctatataggttgatgthgggtagactthttgggtaccatgatatttatctatcgtctataa  
agtacaaaactgtggtaactaaatgtgatttatgaaagctaatthaaaagaaggcgtgaag  
aaaatgaaatcgtaatagacgacgagcgtacgagatgagagtagtgaggaaagaagtaa  
gattgagtgaaatgataaaaatgcaaacgctacctaataatctccacttgtcatgcaacc  
agactgagthcgtthttctthttcgagcttattthttgtthtttattctacTcAaCACG  
ttACACGctTctaataaactctaacaatthaaaatcaaaaatthttgactacaatggtht  
thttggagctatataaaaccaCCtgAGCCtcctcagthttcctccatgaaataaaaagaag  
catcttctagagagagacatatagagaaagagagagaaagctthtaggthttcaaaaaaaa  
aaaaaaagagaccctthtagaaatctcctaacaggaaagthttctcaatthgctatagaaaa

#### At2g33380

tcaaattagggatgatcaattgatcatcactacatgtctacataattaatattgatt  
caaccggctcggthttgthgatactcatagthtaagtatatatgtgctaattagaatthaggat  
gaatcagthcttgcaacaactacggthttcatataaatatgggagtgthtatgtacaaaatg  
aaagaggatggatcattctgagatgthtatgggctcccagtcattcatgthtttgctcgc  
atgctatctthttgagthctcttctaactcatagaaTaAgCACGthggthttthttccaccg  
tctctctcgtgaacaaaagtacaattacatthttagcaaatthgaaaTaAcCACGtgag  
gacatattatattgthgatcatattgctTGTCGtctctcgtthttctthtaaatgthttacacc

actacttcc**ctgACACGTGT**ccctattcacatcatccttgttatatcggtttactttataaa  
ggatcacgaacacccaaaacatcaatgtgtacgtcttttgcataagaagaacagagagca  
ttatcaattattaacaattacacaagacagcgagattgtaaaagagtaagagagagagaa

#### At2g41190

tttacaagaacatgatttttccataatattgaaactttatatattttcttaatattctag  
gcatttataaattattctatgttttgaaatatttatttttaaatttttggagaatactagaa  
catataactttccaagtcctagtgatccc**GGCTacGG**caacacatccctacgagggatca  
atataatcgaaccatctcaacgcaacact**TGTCGT**Cgatcaaaagtctaaaaacattgctt  
ctcaactttgatctctttcctctagctctctatcatcac**cgccacgtcac**tattttcccgc  
cttataactaggggcaatcaactctcgcgaacagagagagacggagaacaagagcaatca  
aatcacacaaatcctcgaaaaagtaaaattcttgattaaaaaaaaacggacattttgtgc  
tcagacactcagctttccttattagctcttttgccacctctctgcaaagttctcgaacca  
ctctgtaaccaaataatcaatcataaagatttgatcttttttttctttttcggtgagatt  
taatcctctaaggttcttgatactctctagatctattcttacttgggtttggttcgaaata

#### At4g14040

tttgtttattcaaatttcacttaccaactcacaagtcactgactatagtaacaaca**aACACG**  
**TG**catggacttatgctaataatgaatgatatgaataaaaataatgaaaatgtttggtgga  
acaatttttcacgattagtaatttcaaatttttttcttaattatataatttagcatgcta  
tagataattgcggaagtaagttttgaattcgtgaaatttgaggaatggtataaaatataa  
aaccaaaacaaaaatgtaccaacaaagctctctttatatctatatcttaattcaaacac  
atccatatacactttggttacaacttgcaagaaatctgtttcaatttcttaatgtacaac  
taaaccctctttagcaaaagtagaattattaacgaatattgtttcttgtcacatacttt  
atatagagacataaaatagaaacatataatgtagataacaacgacacaagtc**caatCGT**  
**GcT**Act**CACGT**a**T**tacgtatagccaaaagtttctactcatatata**CACAaGtG**tgct  
tgcgtttgagatatactca**gAgACGTGT**agcttccactaattccacatactcagagagaaa

#### At1g08890

tgagtgggcttttagggttttgctcttctctatatgtaggctactaagattgattgtga  
tttgtttagacttttagatc**ACACGgAT**tgccaa**cgtaggag**atcatctaccctttcaatta  
ttatgtgatctatggttcgtacatctccttttactttttgaaaataatgtacaaacgaaa  
agtgatttttagtgaaatagtcctccattattaagctttctataatttttagaccctgaatc  
ttgatctgttacaagttcatatttttaatttacatcaatacatttattgtggattgatca  
tcccaatgtattgatggttattttaaagatggccagggttgatcgattcggttcatatg  
attttagttctatg**atgtaaco**tttattgatcaagcaacaagaataaatcaataatttat  
acgata**GcCGACA**taaagagatttctattatcttactatataatagtcacaaatatctat  
aacagttgtt**CACAtGg**Gacacgaccaatgagtcactgccaaatacaagcttcaagagtg  
aagactattaaagaacagagaaatacagggaaaagcaattaggagaaggaacaaaagaag

#### At2g42530

gtgagtttttgtttttgtttatttaacattggagatttaggttcttagaaatataatctat  
atactattagtagtttaactacagttttgacttaattgaaaaatgtaaaagttgtttt  
aacctagctaatgctaaaaatgactaaatagacatacacaagacttgtaacattttcag  
cttaacgactaatacatttttcttttatataatctctatcgagtctagttattaatg  
ttgaaagttgcaaaataaaacagaaatgctaacaatgtaaatatcgtagccaaaatgctaa  
catgtgtataacggttataaccacaacttgat**ggccgac**ctcttttttcttttggttaacc

atagaaatgggttacacgtaac tagtacgaaccaacgaaaactcttcttattcgatagtta  
aagataatagcaatgcgcaaaaatatctagcactCACACGTGT agttttggattctcatt  
ggtcgagagatctataaaacgatactatggagggttagatTTTTctcatctcactttctc  
catcttaaaactcttcttgtatttttctcctcccaaaaaacatctttaagagtcctca

#### At1g04220

tctggagactggaggtataaaataACACGTATggtatgggtatttttctcatagctagtt  
ccttaacagttggaagaatttatacatgaccgcccctttaaaccctatccctactacia  
gacatttggttactttccatcgacttttgaatgtgcatcaggcatgaaaatcctttaat  
tatgcatattttataatcaatgcttaaattactataaacacaaaaattgtagtgatata  
tagaaagataatttaaattggttacattgaaaagataataaaaaattataaatagacatct  
gatataaaaatggatgaagtatagcatatataaaaaacatattgttttgggtcaaacaga  
atcaatgcatagttagctcaccgctacaacaataacatagggactacgtaccatccata  
actacattttcttaaattgcatcctctttctaaaattttgcctataaattcacaataaca  
cttcaacttttttaggccataagttatctctttctctacaataagcaataaatctcacctc  
ccttttttttttttttggctcgtacttttgattatcatttaaaaccaaaaaacctacca

#### At1g79520

ataatagagtgtgatattgttcatcagagacgtccacgtaagggtaaactaatcagtata  
tggacaaaaagggtactttgtttatctacaccaggaagaaaaacaataaccagttttccggtc  
cacaacttttgcacaccatgcatCCGcAGCCaCGTGTGttcttatgaatattaaaatct  
acttatttctgttatacgacaaacgaaagatactgctttgttgcgtagacaaacaaacaaa  
atctcttgataataccagatattcttaattaattagtagcttttaaactcaacataacca  
taagaaaatccagttagctcatggtttcatgttttccaatagatatatgtgtatataatt  
aaacgctttgcatcgtttgtgatttgcatggttgaaataataatgttttttttttggctaa  
tcaaggtttgattaaggaaaaggagtttgactttggacctttctactacaaatacatgt  
ggccctttttggccaacaccaaaaagttccaaaaaagaggccaaaaaataagcaacaactt  
ttgattctctcgtaacctccccacaaaatcagcagagcgcgagagcgagagcgatcggtta

#### At4g21630

tcaactatcCGTGgTcAaccattttataatctataaagtataaagtgtgtaaaaaaaacia  
attcaaaacgatatacacattaaaaaaaatccggaattgggttgctgtcctgtgatcct  
atatttccggtgtagagtcttctatatttcaaaagttcagaatataatcattctataactaa  
attgagtaattcagtcacatcatgatctaccaactctttaattacagttacctaactact  
catttagttagaaattattgatatcctcttatagttcttataactcatttgaattataatta  
ggtaatatataattaggtacactattcgtatatctataataagaaaGACGACAattgt  
aagagttaaaactgagccaaaagttatgggtgggaatatcagtaacgctACACGAGagat  
aaaaccggtctgattcgggaattaccataataagttgaataaaccaataattgaatccgaa  
ccaaattcgaatctaaccacaaattttatttgcttaagacgaattatttactatttatatg  
tatataaaaaagcttctataccacacagtcacacatgcacacacttctcacttcagacia

#### At2g39800

taaccattcaaacccttaattatttcatcagataacattatacactaataatcattgacac  
tcaaatatgtcacacaatcatataataaaataataacaatgattaaaatgaaaaaattgt  
tgtggcgccgcataaaatagaaatcgtgagagacgacgtcatctaaaaattgccttgctg  
tccacttttcaactttgtcctctctctctcatctccggttcaacttccacggcggttCCTcAGC  
Cgcccgattttattttttcccaaaaatcccatcacctatagcgcacaaatcctctacatc

acaccctaattctcattaccatacaccacccaacgaACACGCGccacttcatttgtagta  
tctaaaataccaaacctacccttagtccCACACGtGgcgtttcctgggttgataacagag  
cctgagtcctctgggtgctgctgggtgtttataaaccccttcatactctcctgggtgatctcc  
acctttccctcacctgatattttattttcttaccttaaacgacgggtgcttactgagtc  
cgactcagttaacctcgttcctctctctgctgctggttttggttagacgacgacgacgataa

#### At4g34000

ttttattttctcaaagaggaattattgattttccattttccaaagaaaaaaataaattcga  
aggtcaggaaaattaacaaaaaacttcctttttttttttggttagtttggtgactgagct  
gcttcattttttttctttctttttttttttgggttgatgaatcgatttttggtgctcatt  
actgattgggtttcttggtcagattcactgattcgaagagaatcatgattttttttccc  
gctgaataataagcatatgattgggtggtttgggagattggttactgattaaaaggagat  
tcctttccattttcaccatttgctctggttgacttcattgctgcttatattttcatttagat  
cttttggttggttttagctttggaactgataaaaatctgattttgctctcacGGCTttGGA  
tttggttcttaaattttggtactttaaaactggataaagatcagtgcttttttagattct  
tcggttggtgatgaatttatggatgtatgtataattaaccataatctctctgcttggtt  
gttttcttataggtaaatatccagaagcttgatcctcctagttgtacgaaagcttgagta

#### At3g61890

aagaaaagcaaaataatcgagttttttttttggttcattataaactgcttcatttttct  
taggaacggccaaactgttaaaaagtaaaatagtatggtgattaattgatgtaCCaaA  
GCCagttcgccggttgattgtcaaccacggtatcattcacttgatcacttccatgaaa  
catataaaagctgataatacttatattataaaaggaaaaaagtatgaaaatattatcagt  
agttagatgattagttcacatctaaatgaaatacgacttaaactgaaagagacatgagcc  
aAttCGTGTcga gccacaaattttggacgtatatttttagccggtgggtccacaatattt  
gcaggtctttttattcaatgagtttattttgcttgggtgaataatgaaatttccaaata  
taaaaaataatagaaatccgaggccctacacaagcacacatagtaactcccacattatat  
ataagcggccaatatcagcaactcagagattccagaaagaaagaaaaaaagaaacaaat  
aattccaaaaccttctctcttaatacaaaatcaagaaacttacaagatctggtgaaaacca

#### At1g20450

gtttatatttcaacatatagtatgcaaacttaaatcgtgagaatgacacaaccactaatt  
caaaccactacattatataattctaattcaattcatttaattatacattatataatca  
tatctatataatgttataatatacaatcaacaataaattagaaggaagtaccatgcaac  
caaacttcatacgtctcccgtagactaaaagtagtactatgcaaatatctaataa  
gtaactctatatcaatataatataaaacataaatccttaaatagaaaaaatatggggt  
gatttcattgatattcatccaccgaccgaccgacgtaaaagaaaatgggttactctgca  
acttaagaaatagtaaacgtctttgccataatttaaaaaactaatgaaatctttaacag  
cgtgtgacctccgcggtggcctggacctctacttcacacactataaagtcccactcatc  
acaacaatattcatcacacagctcttgaaaaccatcttaagcaactcaaagctcaaatc  
gaaatttctagtttctctttatcattcacgctaagtgttcaatcgaatcaagattaagta

#### At1g27200

ccacgcaacgcaacacaaactgtcacgggatcatcggtcctcctttttcttcaatcccaa  
acattaaaaatgaaaaaacaagacgagaatatggtccacctcatcgctcgcacttttg  
acacaagtcgcaaaaactagtgccctcttctcgtcttaattataaaacaaaaaaca  
taaaagccatataaaaatcactttaatctccttaattaatcacacttttaattaagccaa



aagtaagacaatgattagtgctactaatcttcggtggcttacaagattacgagaacgact  
cgtaaagaaaaaacgcgctcttccttgcttcttcttcttcttatacacaacgattatttct  
tttcttaacaaatcaaaatcaacaatatttcacaaattaaattcctttatatatttcc  
tttctttaatctctcttaagaaaaggaacaagaagaaggactttTGTCGgCcggcgca  
aaaaccagatctcttcttcacgagtaaaaaccttctctagatcagtttattaagcaacca  
cccttttgctctgcttcttaacaaaccagaagaagaaaaagtttcaattttcttgaaga

### At2g22510

atttgttgggttgaccaaacaaaatattagttgtaaaaaagtaaatatttccaattaaact  
gatattatttgcttttcacctattctcatcagatattgtcgccttgatatttttaaatta  
aaccaaaaacaaaccgaattgttttcgctatacatagtcactcatcgaagttcaaacaaa  
ggccaaaccaaaaggcaaaaccatcggattataaatttatttattgatataactaatttct  
taaatttgtttatcaaattatttttctcacttttttgtagttcttttatttgtgaaaatt  
tattttattttataatatttaaaaaataataacatatacattaaactagggttagctg  
aatctccatgtgtcatgggtgttctagttagaacttagaagtgaccaatcttacttgt  
gggtgtggaacaagtaactctaaataagttgcaacaacaaaacttcttcaaaccctacttc  
tcatcaaaccctcaaaaccctaactcctctataaatacacacaaaactccttcataatctct  
ccatcatcactcacaatcaaaccctcttccagtgacaactcaaaccctaatccccaaaa

### At1g02200

cgtatataaattgtggcggtgggagatggagttactaaaaacgaaacgtacaagtattat  
tcatagctctcgtataaggggttagtccttagatctagatattttcacttttcttctcatt  
tatgtcggagcaacagacactagctggcgcttcaacgtgcatgatcttgattggctagta  
aattccaagcatcaatacctaacacatgcccacttggttcatttagtattcttctcattgg  
taaaatacccttaccttcaataatataccagaaataaataatgaagccatccatcaacc  
gggtgcatttctcaaggcatggatgatgatcagaacatcgatgaaggtgggagggggta  
atagctgagtgatcataaatgaggatccatgtggagatcatcgaatggtagtagtacatg  
tttggctcttagctggccccaccacaaggaattggactgggtgggaagataggggtggttac  
gtcattccacatatctaccaattaaggagtttaataataaaccttgctatataatgtacct  
tggtcCACAAgAGttgaagagacacagtGACGACAcaaacatattacattcgacggtata

### At1g56650

agtgaagatgcacattctaaaaactggtaaaatggtaagaaaaaaatataaaaaaata  
gccttattaaaatttataatctcctattttctctatccaaactACACGgaTgaagcttattg  
ttattcatccaccctttttctcaattctgtcctatttcttgtgcatgaaacttctccatc  
ttgtaatcggataaatcatacccaaatttttcttctgaaaacatataatccgaacat  
taattactatcgtcctttctcctaattttggttaagaaacatggttggttggttttagtac  
tgaaaaaggatggagatacttgctagatcctatgaaccttttctctctaggacaaatcag  
taaccaacaataacttagcaaatTaAgCACGacagctaatacataaaatgtggatatca  
aacatgcacgctcacttcttttttctcgtCACGTGttttataaattttctcacatactca  
cactctctataagacctccaatcattttgtgaaaccatactatataaccctcttcttga  
ccaatttacttataccttttacaattttggttataatattttacgtatctatcttgttcca

### At3g11410

tattttgacctctgacttattttaaactcttaattaacagcataaactgtattaagcgtat  
ttaaatagaacaaaataaaagaaaaaaagaacaaaacgaaagagtggacCACAGCGTGT  
caagaaaggccggtcgttacggttaagggtgtgctgaactgtgattgggcccacggttaacgg

cgtatccaaaagaaagaaaggCACGTGTatagatctaggaaaaaagaaagaatggacgg  
tttagattgtatctaggtaccaggaaatggaacgtcacaccaaacggtacgtgtcggatc  
ctgcccgttgatgctgacggtcagcaacttccccttattcatgccccctgcccgttaat  
tacgtgtaaccccttccatgCGAAAATCAAACCCTTTTTTTTTTTTgCGTTCTTCTTCAAC  
TTTTCTTTTAAATCAAACCCTTTCTTTTAAAATCACATTGCATTTCTAACGCTCAAC  
AAAATCTCTCTACTAATATCTCTCTCTCTCTCTCTCTATTGTTGAAGAAGACTCATAA  
TCGGAGATTGTTTGTGTTTTGGTTTGCTCTGTAATGGAGAAGTTTTGTTAGAGATCAA

#### At2g28400

tatataggaattgacaacaaaaagaaatcacttattagtaatatcaaaaattgtacta  
aatttatttttatgaaatcggatccggtatgcttgcttagattataactaatactttata  
actaataccattgtcaaaggaggaaaacgggtgtctgagaaaaaaaaaatctggtttgta  
ataaattccatccatgtaagagttattattgTTTTCCAATTCATCTTCTACGAAATTC  
GAAGAAATATAATAAATTGCGTTCTCTTCTTTAACACATGATTCAAATATTCACAGCGTA  
GTTAATAATTGAATAAACCAAGTTAAAATAAATAACCTTTAATCGGTTGCGTGTAG  
GAGCCCTTGACAGTCATCGTTTCGTTTGGATAAAATCGCAAACCTCTACGAAATTTCAA  
GGGCATTTCCGTAATTTCTGAGAAAACGGTGACCAAAAAGAAAATAACACGAGGAGGTGA  
AGTCTATGCTATCCATTGACCTCACCAATATATAAAGAAGCAAAACCCAAAGCCTAAA  
AGAATCTTAAAACCTTGCTTAAAACCAAAAACAAGTTTCATTTCTTCTTCTTCTTGAA

#### At1g72770

tttaaattcatctttctattttctgggtaagctaaagcttcttttttaatttagatccaa  
ggaaaccatgttctactatatgattatggacgttaatggttcgaatttttagggcttt  
cttgtgattgatttcgctgattttccctccttttctggTTTTGTGTGAATTTCTTTG  
ACATGACCGTTGGATAATGATTCGTGAGTTTTGATTAGTGCTTTGTGATCTCTCAATA  
GGGTTGAAATCAAGATAAGGATTTGAGAAAAGATCGACGAAGTTGTTGCGATTTGGGAT  
CAAGAGAGTGATATAATCGAGTGAGGAGAATTCGTGCTATAGATTGCTCAGATCTGGTTA  
TCTCCGGTACTTAATTTCTCCTTGATTCGTCTGTTTTAACTATGCTAAGTTAGTGATGAAT  
AAAGCGGCATTTGGGTCGCTGACAAAACCTTATTTGGAGCAAGGATTTCTCAACATCATG  
AAACCATTGCTTAGAGTATTCGAAGAAGAAGATGAAAACAATTGATTTCTCCTAAGTCCA  
TCTTTGAAATTTAAAGCTTTGTTGTGGTGTGGTGTGGAAATCTCTGATTTGGAGAGCTC

#### At4g28040

agacattattgaataaatgtcggattatctactatatatgtgtgCGCaTGTGatatagta  
ctgtaatagtgggctacaggccaacttcggctttccaagaacatgggtgcatcgagcata  
tctttgctagattttaaatataactacaacttcttgcttactttgtgatgcggaaactca  
aaaccgtaatcactcatgttatatttttggttggttctcaacgctaatatctgaaacc  
agttttcgctgggtctaagatccatttgcaagaaatgtcaacaaaataaaaagctcttatc  
attcccacgagtttagttaaggtaatctattattccaagacttcacgaaccacctata  
tatagaagcttacatattctatagacttaataaatgtatagttcaatattatgtcactaa  
cgtacgcggctaacaggtttgtaatccttccatcacatgattgacatacacacacaca  
cacacgcaCGACACATTATTGTATTCAGTATTCACATATACGATATATAATTACAAGAG  
ACGTGTATTAGAGAGATTCATTTTTTAGTGATTGTAGATCTTAAGAGAGAGAGAGAGAG

#### At4g39210

aaccagagaactacgaattattcgggtgagttctctcattgatacgatcctcttctatata  
tctcCGTGTtcttctagcttgaaagcatttttaaagtttttacttttggaggtttcacat

tctctccctgaacgatttttgctttattttgttcagcttcggttctcgtcgaatcttctgt  
ttctctgctgattcattgatctgaaaatctaaaaatggattcattctgatttaacttta  
tcttgttcaaactcatttatgatcccaaatttgttcgtttcattctttataaattagaat  
ccttttttgttcttgtggcaattatcttctcctttttctctgtttgaaagatttgttac  
ctgcagaagttaattccattgatttcttgaagatgcagtatctcttgctacttaaaagag  
ttagattttttgtctgatacgttaaaattatgagaggctcgttcgttcctttaatctgtgt  
ggtaaagtttctactttccgagaatttctttattggtgtgtgtggttactttgcattta  
taatagtttttactaacgagctttacgattctgttcttgtctcattccagctaaaaaag

#### At1g69490

attgatcatggtttatcagtaatcatgaaagacaaagagtggtgactattgtaaaccaaatt  
ttagaataaaataaataatttatcatactatatacagtattttggttaagtatatgtcatc  
caatagtaacattatcattttaaactgaaaaatgtttcagctactttaaggaattatagct  
ttattaaaagtataactttta~~gg~~**CACGTGTT**A~~g~~agggtgaagaacaataaataattact  
caataagttcaccagtcacactccaacatcttattcaaattccttttaaagctttttta  
~~cg~~**gtgg**~~ct~~gtttgatgaccatttgacaaaatttagtatattagaaaaaacaataggata  
gggataatataggacatttagactattagatggacaaaatgaagtattatttaattttcca  
atgtaccaaccaataagaaagaagtgacgcacagtaaacgacaaaaagctcaagcataaa  
aacccaaacttctctgctttctaaacatttcaagaaccttgagaacatcaaaaactaac  
acagaaagaaaaaaaacagttcctggttctatttagattgttttctaaattgtctgaaaatc

#### At4g27410

aaggacaactggc**T****AACACGTGT****cg**a~~ta~~aaacttttagcttttctcgtgacggttcatgcacc  
cgaacggcaccaatatagtcgaatatagaataataaagcttcattgctttctcagtgga  
aaaaaacttactataaattagaatatttctagtaaatatttagacattttacatgtcacga  
tgaataagaaaaataaattactgcaatcactcagcggacttttctcataatcgtagta  
caciaatttcttactcatgagaaaattttc**C****CGTGT**tttttgacatttatatcgtctgg  
aaaatattgtacaacacatcgataag~~gt~~**cg**~~gc~~**ag**tttcat**A****g****ACGTG****g****cg**atctaaat  
ggtaaacgggtccacaaagaaaatcgtaatttagattttagaacagtaagacaaggacga  
ccgtacttatccttgaagaaccttggc~~tt~~**CC**gt**AGCC**tatataaaccaactacttac  
tatattgtccaaaagatcgacgaacataaaaaacaaaacatataatttgggttttttagag  
ttcgaaacttgaaatctttttttttttgggtgctgaggaatcgaagtagaagagtataaa

#### At2g34810

aatcacgccacatgcaacaattaactaccaaggggtcccaaaaaagaaagaaacacatac  
tactctatttaatttgataataaacaataaagtcggttagtagattatgttttacata  
taaaaacaattaaagtcggttttggttaattatgttttacctataaaaaaaaaattcacca  
aaaacattaatcaaatcatatcctagttgatcattgggtgaggtgactgacaggtcgtgg  
aattctggcatcctatc**G****CGACA**aatctttaaactaaagtaactcttactgttacttttt  
aaatattgtca~~ag~~**ta**~~acc~~aatatcttctacggaacttatatccaatttgcatacttttac  
tcatactatacaaaaatacaagcggatataaacaacaaaataagaaaactacactaatatc  
tatagaaacttcaaattgaattgaatattatcgtgatataatataatataatataatcgc  
cgaatattccctggaaaattaaatacaaaagactatactactctattggctataaatacac  
acacaaaccaacaaagctatttcatattcaaaaaccaatcacaataacaaaacgaaa

#### At2g30360

tgtagatcgattgtacaaaatgaaaaactatatgatttaaggaactagatatacatatg

catcgactcaagaacagttgctttatgtgaagactatcaattacattatcgggctaaattt  
ggcttcatgtgttgaatagatggattgtgtgctcaggtagttgtgtcagttaattataac  
agtaaaccttcactgcttcacatatataaaatttgggttaaaaaaactttaacattttat  
tttttaattgacaacaaacaaattctgtaacggttacatataatagtgcttcagttaaa  
ctccttttttaggcaactctaattcctttatacccttaatccattattattctatcgaac  
ttatcttttttaaagcttcgcggttacgccatcacttctccaccatttaatacctaaac  
cactttctttcaaatttcttattccataaaaagtaaattcacaacaaaacccaaaaaaa  
aaaagagaagaagaattagcttaCGTGTcAtcacatctgcattacgcgcaaacgaaaca  
gattcaaattctcggggaagttttcttattcatcaatcaatctctggattcatcaatca

#### At1g49450

attgtcatgtatataagctatagcatatatacggatggaatatcgattaaaccattttct  
ttttcaccattggaccataatcagataatatacatagattgggaaccccaaatattttca  
cattttgacatatttagtagcgacattaaactacttcgtgaaaatacataggaatattatg  
tcaaattgtcaacgaaactttttatatttaataagaaaacgaaattaaataataataac  
agaaaatactCACAAgtGactttcaatgattttgtcttaacgttttcaatgtttatttt  
ttggtctctgactcttcaaggaaactggtaaaaccgggtgtcccggtagtcatcactcaca  
tctcgtccacCACGTGTcactcttaccggttcataagttttcccacctttctacgtccga  
ttctgtatttatataccctaaaccatcgtctttctatacatgctcttatttcacaatccc  
acaaaaaaatctcaagaacatttcaagattcagaaaaagaaactcgcgaaactttttt  
cttttgttctgtcaacgttcaaataatcaagcgattgttttttttaacctagaaaaatt

#### At2g27310

agaattggagatattcaatccaagtccagatacatgaataactagctaaaaatgtaacaat  
agaaaactacaaaaacagtatataatcgcagttaaatatgacattttcatcaaggacata  
actaaaaatatagaaaatttcttctatacaatataatggatatctaaatattatataat  
ttattttaaaactttatataaaacactgatgtaacatttctcgtcggatctttgttctct  
gatattttatccattcacaagaaaaaaaatactatattttatttttctttatcgacaaaa  
agaacctttttaatcttatgataaaaatgaaagacttcataaaAgACGTGTaAaaaaa  
agaagaaaatggagcgtgtgtgtACgCGTGTctactatgtatagaaactttagaaa  
attaggaagaatcattcaacttgaagtagaatagttctcaaagagccatgggtgactgatc  
aaccatcgccttcttcatcctttctttattttctacattagtcatttaattcattcatt  
atatatacttctcttaatttcttaatcatctcttcttatagttttaccctaagaaaa

#### At1g45145

ttctatcatttagtgaaagaacattactagaatttgatttatttagaggaataaagaagatt  
gatcaaaaacagcttgcattattattcaaacataaatctagcatattatagataatatt  
tttcttattgtcttagataaaagtttccattcaactttgCACGTcTaaaagctcggaatag  
tccacaaattatcacatagaaaaaaacttatattcgtGcCGACAaaaaaaacgttactt  
ttttatatctgcaaggacgagaaaagaacggataaaactcatatatcgtgcacacaaaacA  
tgCGTGTcttctacatctagaactgtcgttactcgttaccaTcAtCACGccggttgaccta  
gactcatgcctattctttaatcgtttaataaaacogttggatcccttcacactcctacg  
cgtcaagatcgaactcatttttaggaaaataattaaaaaaaagaccgagaagaggtagag  
gtataggtgggtcaagtcttgctataaaaagctgatcccaacaagaataattctttcattc  
acaaaaaaaactcatcaatcaacaaaactcttaaaagcttaagaacaaataataaaaa

### At1g79270

ctaatttaataattcttgagactttttaaaaccctctgcgaaacagatgattcagagttt  
ggtttcttcatctgtggttttgatTTTTCGTCTTTTattcttagtcaaacacataaaattt  
cttttactactcttcgtagatgacttctcatgttccaaaacatcctcgtaaagtactct  
ttctctctttctttcctacaCACACGTGTTAatctgtgttggtctttACACGTCTTTta  
acttttgcggttgaccttttatctgaatcctgtggttggtgctgtaaatatataatg  
tgtgtctatgtgtatagtgctctggttcttgatgtagactcatatgtcttattttcaat  
attaactataaataataagtcacgcctagttattagtttttatcggtagcactaaatat  
tcagacatcagttCACGTTCaaacctgtctcttcacatagttaagaaaataaaggcactc  
aaaagattactagtaatggttggtctactttatacacatataatgtcttggttctttgt  
gttttccagaatctgatctcttcgggaacggttggttaatttggttcagcctttgaagat

### At2g37900

gaattcatgtttttcattttgggtctgtcagaaaaaggataagatttaggttagcgggata  
aaatcttttagtagaagaatgtaatgagggaaattttctttggtggttttgctgaaaag  
gtgaaaagaatacaaaaaccatcctgtaaagttggtgaaggacaagttcaggataagat  
tttgatttgagattcactttgggtttggatttaataaaaattagaagtttaaagtaagt  
ttatagaccaagttggttgacaagcaatcgaattgggagctatggtatgtcttgattat  
gctt**acgagtt**ctttt**atggtacc**tataattttcacctatgtgaatacggcctgtgtg  
actcatcatcctcaacatgaatgtggaaaaaattaaggaaaattagaaaatgaaaactgc  
ttgaggctgaaaataaggcaatgtgaaaaacactgtacaagatatgactcaacacagtg  
gcttacgcctatatatagaggaccaagtggtctctctcttaacacacacacactgacac  
acacactccttaagatcatct**ctCGTGT**agtgtattttgtcaataaaaagttgaacaga

### At4g34410

gatctcttattcatgactgtgaaggccattgatgatcaaatagcatgtgaaatcataat  
tttg**caagtg**atttat**CCtaAGCC**aatcagta**agttacc**tagctacttattccatt**AaAC**  
**GTGTTA**aatttatatgtaaactgtgttaaaaaggaaacaattgataagcgaatcataat  
aatactaattaaattaacaaaacagtaaaaagaagttcttgaaaatcgatcatgatgatg  
aaatgattaactaataaataatgtttaagaaatgtcatgtcatttaaaccccccaaaaa  
aaaacaaagacgtcacattcaaatgtcaaaaaatattcgaggaaataa**cgCACGTGT**ttc  
caaaaacacagatcagaat**acgtC****CGTGTG**a**aa**agagtggtggtgagtaggca**cgcca**  
**cg**tagatacttgacaaaa**acacg**gagccatataaatagagcttctttctcactttcagtt  
tcccaaacacaaaacaaaactcatattttcaatctccaggtgctttacaccaacagagtcg  
caagaaaacaaaaccaaactcggatttagtttgacagaagaaggaaatcgagagtcgggt

### At4g27260

taacaattcaacaagtgagatttttttcttttgtaaattgcaacaaagtaacaaactggt  
ggttcattacaaaatcttcacaattatataatgcttaagtcagctcaattatagctaa  
gtctaaaatcttcatagcaattatagtcacatggaattctctattaaagtataagaagaa  
agaaatggtatgaatgaagaatgatatagttagagaagtcattattatagagtagacca  
tctttatccatccggtacaggttttgaccaatacggaaagagagaaaaagagtcgcaatc  
ctttttttttggttacgaaattaaaattatataattagtgcaatttaaagcacgaatagt  
aagcgttcaacttaattcctcgattaactgattagcatattacgattataacccttcatctt  
ccttatttggtctctactctctactttcaccttctttcttccattctctctatataat  
atcgaccctttctctttctttcttctcactacacactaaaagcttgcaaaaaccataagctt  
atctacttactcatctctctcacaatcattttctcagacttctctctttctcttaaac

**#At4g26080**

tatgaattaaatagtttaaatttcaagaacgaaacatctccccttattacaaaaataa  
ataagccaaaaaaagtatcactttaataatgtaataaaaataaagtgatataaagt  
atacatacataaatagtagattcgaagcaattggttgattagcctaccatttctcctt  
ctttctctcttctatctgtgaacaaggcacattagaactcttcttttcaacttttttagg  
tgtatatagatgaatctagaaatagttttatagttggaattaattgaagagagagagat  
attactacaccaatcttttcaagaggctctaacgaattaccacaatccaggaaaccctt  
attgaaattcaattcatttctttctttctgtgtttgtgattttcccgggaaatattttg  
ggtatatgtctctctgtttttgctttccttttcataggagtcattgtgtttcttctgtc  
ttcctagcttcttctaataaagtctt**CtCTGTG**aaaaatctctcgaattttcatttttg  
ttccattggagctatcttatagatcacaaccagagaaaaagatcaaatctttaccgtaa

**At1g52030**

tgagtattaatcagcgaaaaaacgtattttgaatattttatgttttggtttcttctcta  
actagtgactacttctagatttcaaagaacttataaacaattattatatttttctt  
tttctttccaattttgtatttcttcttcttaacaatagctttaagctaggcttctttt  
ctctttataacgtcaaaactgattagttgttaggaaattgcagaggcaaattaaagtaa  
tgatagtgtaaaccatgaattttgtcaaaatccagaaattttttctaatgatttctcttg  
ttaagtatgtaaaaaataaattatgtcaagactcaaaagaagacaaagatctgaaaa  
gtatttctgaatcatggaacctgagaaataattcaacaaaaaaagtaattaattatc  
tagggttataacgttttttgcttcacagttgtgataagtaaaaaaaaaacatagttgtg  
ttgcttctcttattctgtttttcatatgaggagaccattcggttctttgtttcttagtg  
tgtttctatgaaaacgtttccatctttcaggtattttctgaagttaaaagatagaaataa

**At5g42800**

ttaatatgttttataattttacaattttgaataagaaactcctaattcataaatctaaa  
atataaacatatttttcatttaagcttttccaagatttataatttttaggtgtctgat  
tttagatttcaattaaatataaataattacttaagtaaaatgtatttctgtatatattc  
tatcaaaatgttaattttggttagacaaattttgatttatttctgtaaaagtgggtgggaa  
caaaaacaaaaacaaactgaaactg**agtcaccACACGTCT**accaaacaatcgaagtc  
aacgtatttcaaccaccggtacaacaacaaaatacacacctaaaggaaataataaatcaa  
cttaccagattgttacgtaccacacatctcttttagtccttcgtcaaccaacggtt**cccac  
gtg**cttctccggtggta**ctcacgtgaccg**gcagcttctcgttcttattatctgttttct  
tcaataacgattcataatctctagtgcttatttataatgtcttcacatcacaagattt  
gtaccgaacatacatagttgaatctttcccaaagcacaatctatcatataaccacaaaa

**At4g14020**

atgatataaagaaaaatacaattaaggagcctgcgatcaaatgcataatccccgaaact  
aaccggacagatgacaagatatccttgaaactaaactcaattgaacaaaagcaaacaaa  
caataacactccaaatgaaaagcaatggtaaaacaaagcagctaaatggggatctaccgt  
caacaacgaataaatctaaactataccatataaccaacatcaataattcaaccagtata  
taaattagccacctaaagaataaataattggattttttcggaaaactccttatggttcta  
tgcttcaagagactaattacgaactatttttttttttttttgttaaagagtttgcatcac  
aatcactcttattccaaaataactaagaagaacatatt**acgtccggcggtaact**tttt  
gaaaaggagaaaaaaagattttgttttcgatataatgaattatctttctagtttaa  
agtaaaaaagattcgttaaacattacatttacaagttacaacacaatcgttactata

aataaagggtgtagcccoactaataaatatataactcaaagcataaagaaacatcaatca

#### At4g35060

aacatttatatttgttgcataaacaattaacatgtcaaggggtggtccaccaatacgtaa  
catgaacagtcctgtccttaagagattccaacttccaatcccaaaatattcatcaattctgt  
aattggttagtcagatttgaataattgcaatagagatatcttaaaaacttcattcaat  
agcaaacatgaattgtataacaaatgtctatttcatctatctgtcaatgtttaattattg  
ccacactggatgcatatataacaaaagcgacctatagattaaagtccttttataac  
aggttcatatacaccagtaaccaccaatacacat**acacgta**catatataattattgccc  
gtttgagagtcacactcat**ACACGact**actgaaggttgatacaaaatatacagcatataa  
taactaaatataatggtcgaaaactacttatagagtttggtaggtcgtattttcaacattt  
taaactcaattttttatggtgacaataacaaaaaagaaaatcatatcatatatactcaaca  
tatagagtcacttttttcgccaacccaaaagaagaagaacccaagaacaagaaaa

#### At4g36290

gatatttctttccagtagaggaattagaatctggcaacactagggcctaaacttcttttag  
tcggttggtttcatttagaactttatttttttttgttttcttttagattacgtattttgt  
tttctgctggatttttgctgttcttttatttacttttagactttaataaagtttg  
tggttgatttttccaactctcaaaatatactcggatcagcttaacaatttttggaagta  
ctatcactatcattaacacttttggttcagtaattaatttatgttcgatacataatc  
tccagacattatataatctaatgggttatagccttataggcttttagcatagttg**GGCT**tg  
**GG**cttttgaccaactaggatttagtgatctgcaccgtaagagcaaagcctttttttttt  
tttttttttcgccataagagcaaagctatatacagtatcggagattaaaattttcttact  
attagttaaactgactcttaaagcaaaagctctagtgatctgcacac**aacgcgtt**gtttt  
agtttcaaatagggaaacatcacgctgttttggtcgaattcgttt**TGTCGc**Cgtcggtaa

#### At1g62660

ttataattactcttaaaatatagaaatagaaaaatggagtggaatattattatttagaaa  
gatataatataatataatataatataatattgtttgtatgcagaatgtagaccaata  
taattagtggacatttctataaaaaaacaaaaatgtggaatggatgggataaaaaaaa  
aagagagatcaaagataacattttaagatgtttttctttctttaattttcaacaatttta  
ggcaatttagtagtagggggaaatgtatttctatgaaaatccaatatatgctaattgtat  
gcaacaaggaaagatatagtaacccaaaactccacttcatattacaacaataattatttt  
tataaaagtattgact**TGTCGt**Ctgc**AaACGTG**At**A**cgatgaaccttactggtaataata  
caaaaatcacagctctaatttgccaaccaatccagatctctctagttctcaacttctca  
tataattattcattaatataattttatgttggattttttgatataataaata  
ttggacttgccattttctattacaaccatcaaatctcaataaagcaaaacgaacaagaaa

#### At2g02710

attagttactaaatgaactattaagttcacttatcttatccaatttgtgtctaccctaca  
taaacctgtacttatccctaaatcactttagataaatgttgaaaatttaatttataaa  
ttttgtatttaccaaattaggaaaacaaatatactgaaaatatttatttttaatatcttaa  
caactcgaagaactgagaacgcgacaaaaccaatcgtcctctccgatagccacaaaac  
aaaaatcagacaagaagaagaagaacgtttcttctaacagatagagattacaatcaaat  
tgactcttaattttctcaattccgatatctctcatttcatcttcttcttcttcttcttact  
taaggatctctggtttctctttctctctctgtcttatcttctccaaagttacgcttttt  
ttcaatgaaaacattttcttgattcctgatttcaaatccacaatctggatt**tcggtgt**tt

cgaattcactttgaagaaaaagttttctcaatttcgcctgaaaaccCACATGgGattggaa  
ctaaactagactgacaagaagaagaagagtaatcatcatcgagtgtttattacgatta

#### At4g22880

gataaataattagtcccccaaaagaattattgatccacatacaattgtctatgtgaaat  
tgaaaaccagtc aaattgtttttttagtaattgatttccaaactacaaaaagaaaatgtg  
gttagtagaagaacttagtagaggTgAACACGTGgagACACGctTaaagcacgcgacgaag  
aacacgttgatagcgattatgggtttaattctattgggccttttctgggagtctagaCCc  
aAGCCcatatagtagtaatcttttgaccaatcagtc aaccaaccatcctctcccggtg  
accgtgaagtgagtcacgcacttacctcacaacaatagcactaaccaccggtagctctac  
aatgtctcttagtccggaacaaactcttctaactaaaagtatagtaaaaactttgctat  
ataagaaagagtccttgcacatttcatttacttgcaaccaattacaaaaagagtgtaag  
aagaaaaacaaaacaaatccatttttttattactctgtttttcccctgtttttaagtt  
tatttacttcttactctgtttttctgctctgttttagctttaaacagaagactaagaaga

#### At4g21650

aggattggtttttagtggtaagtttttttgaaccaaccaaattgaatacaatgtact  
tcagtgataaaaccaaataattaacccgaaagaaaactgaaacaaagtgagattgttttg  
agtttgacactactctcaattattaacccgaaaccaaaccatccgagccgaaattcgaa  
tttaacccaaaagttcatcccaaattgggtgggtgagtcatagAaACGTGaattgaaagatga  
ataatagatgaattatttactatatacaaccatagaggcttctatgccaccacacact  
tctcacttaagaaaatgaataactctttacaaagttctaaacttgtgcttctattggcta  
ttgctttggctcctatttctTtAaCACGgagctggattttcttacagctgctggagccttag  
acagtgatagcaaagattcaactaaaaatacctttctctatttgcaaaaatctctaaga  
gtaaacggattttaaatgttggtactctgtttcgcggattttataggtttatatag  
tgtatcttggcgaaagagaacacgatgatcctgaacttgtcacagcttctcatcaccaga

#### At4g23690

cttagaagcaaagctagaacgtgatttggtgatttggttttacagttaccctaatttttagc  
catatggaccgcacatgaatgatgggcggtctcaaagcaatatttccaaaatggctcttt  
aataattgggtcttttttccatttctgcgtaacactttcgtttgacgttttggttaaatt  
tatttttcagataattagatatacacttgctgttacattagctagctagccttcgacttta  
tgcttttaggttgactcaccataccggttaataatagtttcaaatcattatataatata  
atataatatacttttctgtcaaaaaatattaatctatcaagaaagtgaattagggt  
gtagcttagttaccaccaaccccgcttccgcatggctgtaaaccttatgatctttctaa  
tttatatcttaaatataaatcggcaaaacatcaacaaccattagatatgtccctcaaac  
tttgaaacgattatccaataaattatttattaaaacaagtgaataataacttctatata  
aatgggtttaagcctccttcattaaacacatctcacaactcactaatctctagctaacca

#### At1g21400

gaatctttaataccaattccaccatcatcaaatcgtttatgggtgattgttggtgtaactt  
tcaactacactataaatggaaaaatgttttctcgtggatcaataaaaaagcttttttt  
ttctttgtttttcacggacgtcatggaaaattcaagaaagatataaatgacacgcaag  
aggtgactttacaattttgctatcgttggataaagatcaaaattcaataaaaagcacaag  
tacagtttgggttgggtgttgaaaaaatctttaaatgatttgctaatgtaggtgttacia  
cttctgtcaatatttcattttgatttttttaatttttcaatagattttgtccactataat  
tagtgtaaaaactaaaaatcccaaaaagagaggaagataaataatcattttaagaaaaga
