# Supplementary material
Source: PubMed Central journal article supplement (PMC1203392)
Supplement: plntphys_pp.104.058412_3.pdf [file plntphys_pp.104.058412_3.pdf]

## Motif map of VP1 dependent (VPD) class

Significant motifs from VPD genes were mapped on their promoters (600 bp 5' upstream from putative ATG).

### Legend:

p<10<sup>5</sup>    **acgt**  
p<10<sup>6</sup>    **acgt**  
p<10<sup>7</sup>    **ACGT**  
p<10<sup>9</sup>    **ACGT**

### At3g51810

taattattacatggtagatatgactttgtcgcacaagtaaaccaactaatcctcgaagcta  
ccttctctt**cccagtta**ttatgtgtgatcgattataaatctcttcttctaataacacct  
atatttttcttatgatgtgaataaataaaaacttttaactttaaacatatttatccga  
aatattgcacttagatttcaaatagataaataatagtactatctaactgatattgaaaag  
acct**aacacg**gaaaacagttttataaaaaatcccaaagtgggtaattatcttgatttct  
tgggggaaacagaaaatggattaagattaatcg**gagtcgTGTCaaGC**agctcgtaataa  
ctgtagcaagttgactgagtaagcat**caaCGtGtCAT**ctc**CGTAAaGC**ccattatttcta  
gtct**CGCCgCGT**cttctctt**CACGTaGCAc**ttcacttttctctccttttgtttctt  
ggaacacaaacgtttctatttataggaataattacgctcgtccgatatctgtgt**cggaac**at  
agatccaaattaaagcaacttacttaattacatatcgtt**cggtgtt**tttttcttcaaaaa

### At5g40420

catctttgtgaactaatatagtaaatggggattggattggcacaaaactttatttacgg  
aatcattttcttaatttgatactaaaagttcgaaatcgaaatttgaaatccaaatgtgg  
tgcaaaactacatcgtcctatcttcgatttcccatcttctttataatttaacatggata  
attcaaaagctattgtctagattacatattttggattcgttagtcacataaccaaaaatg  
aaactcttttgatgaattatgtattttcaaatttgattggagatccttttagacttcgg  
actcaagtatacatgcataggatagttttctt**TGTCttGC**tttaaa**tcggtgca**gcgg  
agaaagcgaaaacatcttttaaaatctcatgaaatgaaataaaaataaaaactaaa  
agaagaaaaaagttgaaacttgaaatcatgcaaagccacacctctactacttaacatc  
tcaccgtctt**atgtgtcc**cttctctcatctctccaacttcttctttaaataaaccttctcc  
aaacttttctagttttattacaaaagaaaataggtaaaaacaatttctcattagcttacia

### At2g35300

atatacatttatattcataactcggcaagtcatttgcttcattatactagctaattattg  
acaccaacttaggcaatctatgaaacaatccctaattgtagatttttgggcaatttagcg  
aaggagggtcgaaggaatctctct**cacgttc**catgcatcttttt**atgtgacc**agttgttt  
tggttaaaaagtaacgagttatggaactacgtacaccgcaaataccaaaatgtgtttagc  
caaataacatcaacatttttttttcaaacgtataatatttcagctttttttttgttaa  
acagctaccttaaataattatgtaacactaccgacaaaaaaaatattatgtaataacttga  
gaatctgacaagataaagaagaaaagataatgcaaaatcaagaaactattgt**cggtgtt**c  
gtgtagatttgcttttgcat**gagcgcaaccacgt**agata**tcgtagc**ttgt**gacacgta**  
**tc**tacgtatt**acacgtggtga**taaccagtagtctgtaaatagatcggagagcatataa  
accattaagccaaataagtttatagtttgataagaaaagtaagaagaagaagaagaaga



### At2g21490

tatttatatggttttgggtttatttgggtgtgggatcgtattatacgattttttatatacttct  
acaaaccattttctaacaacaatgtttcagttcaaaaccaatctaacaagattttgtattatg  
atccaacgttaacttccatgggttcggtttggttagtgctttatgaaattagttaccaacac  
aaacttgcacttaccaatcagaatacgtcaagaattttaaactcggaacaccgaccttct  
ttagcgggttctaagccctgatcaaatccacatgtgtccatggaacatagaaagcaccgta  
cttaaagataacgttatctaccgaatctatcaaaaaaggcaaaacgttattactatgtc  
ggattcgtgacgtacacatttcaaagtacacacatgacacatggaactctaattctatcc  
gTgCGTGGCAaacatttcacattaatAcGCCACGTAtcaatccatgcagattaacatg  
tctaataatataatgcatgcctacttgaatcaatcccaaaccaagttttcttcaaagctgta  
tttgaagggtatataatctcacacacaaaacagatcagaagctaaaaggttaataataa

### At2g36750

attttatttttaaatgaaattttcattaagagttttgatTTTTcggagaaaaaaaaaaga  
ggaaacaaaaaacgtttttaagaaaacaaccaagtatttcacatatcctaatttaata  
tcctatcaaaatcagtcgtcataaagcaaaaaaaaaaaaaaaaaaaaaaaaaaagactagaat  
agctagaaatctagagtacacactttgatttagtttgaagacaaatggtgaggcttgttt  
gtccatacgacataaaaaagaaggagagactgagatattccgaatttgatttttcttctt  
tattcgtttatccaataactaatttttacggctataaaacttttctactatcttttcgacgta  
cctctagctaaaagatattttctcttaaaattttgggcttatatgaatacaaaagaacat  
atgagtgccGCCACGatagtactgtgaaccacttagtggttttgaactattacgaa  
taataagccaatttcttttgttctttcttacctcacatcttaataatgtaggcacaga  
gaaacacacacattatcggaaccaaagcaaaaaataaaccttagaagagagtttctca

### At4g36600

cttcttcacctctctcactttcgggtgggctcatgctgggtttcttgttgggcttagttt  
tggttttttatggttttaaatcaattttcttgggtgaacccccccccccccacagtttctt  
aaaaatgagatgacaaaaaaaaaacattggattaactaagaaaggtaaaaaataaacac  
tttctgatttaccttttactggattatccgggttgtaaccctgctaagcgcacggcttc  
ggttttctaaaccggttatttttaatctttccaagtattgaaacttctctacggaacgG  
CCACGTGacctcgggtcgggagacactaacctacaaaatcgaaccacaagtgaCACGT  
cGCAagcacttccagcataaccgcctctttaaTGCCACGTAaacatcgaataaccacgt  
aatcatcgaataaccacgtgtcttacaataaccgcttatctagtgaagaaaggaatgtg  
atctctccctctctcgtctatctataactagaaacttctccatgaagattggaaccaag  
aaacaaaacaaaaatcggaaattttaaagaataggaataatggagagaagaacgttgatg

### At3g15670

cttggcctaattgtcacactatttatgtgaagggtgagtagttaagctaataacctcgaag  
ttgcttgggttatatgagatcaagtttggtctctgtaagtgaagataataatttaaagag  
tattttaatcgtgataatctaaatggttagttgatagttaatacgtcacggaacatgtacc  
gaccgacggccgatttccatgatacaataaaaaaatgaaattagcaatctcataacaTG  
CgACGacgatacttatggtgtTGCCACGTAGCAagcatcttctcttaacctgaggtgt  
cgcaacctcagaggacaacacggacaagaccgagaaaccgcatactaaCGCTTGCAACGT  
aAaGCacaacacccctaaactcctatttttttaattttcttttaacctcaacacacCACG  
caGCTatacacggttcaatgtgctaatacgtgtcttcttctccgcogaccaagacacact  
acaaATGtCCGatgggttggggagacaaatcacagtttctactacaacaacaataactt

ttacgaaaaaagccttttaaacttatctagtttcgtttgatacacatttgaagaaagaaa

#### At3g54940

aatttaatatattaccattgagccttgccaaaaattaaaatcttaccaaaattcttaata  
ataaaatctcacaatttattcattaaaaaaaataaaaaccttagctaatagactacca  
ttaaggatggtctaacattcttcttggttaaatcccttaactaaatataatagggcgaag  
ccctctttggtgggccaagaatcttgaccatctgaccaatattggtccaacaagagaaaca  
tctatggtgctgtagtctgatttgtaacattacaaaacaatggaacaaggaataaggt  
tttttttttttttaaatccagtacttttatgatctatgagtttaaaactaaaccaaacctc  
tagttttttctagactcaaagactaaaagtctcattgataactttcaacaCGCGTCATG  
CagcttcatTGTCaGctctacatgcaaacatccacgtggttccactctgcatgtatct  
ccaacactttcgttacctcaaacttatgtaattcatctttataaattacacacaaaGCCA  
GCGattctctagggactcagtaaggccacctcaaacaagaccatcgataacagcgcac

#### At4g14690

ctctcatttctcaaattttattgGCTACGTGtttttggtggttagcgttcaaccctaatat  
cgatataattcttctttttttttcacatttttaacgatttcgagcaaaaataattcgattta  
tttgataattttaatatggttagttttacaaataatgaaacgaatgaccaactgatttgt  
taggtgttacaataaataatggaaaaaatctcataagtttgaaaacatttattctgaggaa  
actttttcttccccaaaagaaaaaaagttaaagtggaaaaagaaaaaaaggaata  
aaaagtttgaattcagtttttttcttttctttgatagatttcttctacttatttattac  
tctactacacaccacacaaaaacaaaaataaaaataagtaatcatagtatcccataaatca  
gtaaagataaataaaatccagaaaataactgggcctatcattttcttcccaactctata  
aatgaagagataatcctacagttacacctcaaaccaactccatctcacttctcaagtctt  
ataatttattcatttctctcttcttcatcgatcttcggcttttagaaaacctaatacagaa

#### At4g16160

ttctcctactctgaaatattgaaaeggcacgaggcaattgcttcgacggagagaagcaaa  
acgcttctcgccggagtcacagaaccggagatttctcggcgtagaaggagctgcggttg  
atgaacaaagcgtacgattcgctaaaggaagcgatgcttgtgagaaggaaagagaaagaa  
ccgattgcattgtgtacgagagagtgaatgagagatctgtgtagagaaaaggagtgac  
ggagatgacaagtctgtactagtctcactcgacgagcggaggcggagatatcaaagcggg  
gATGaCaCGtgccacgttctcgtctttaaccggagatttcaaattcccggctataat  
atccaactctgagcccattgggccttttatttctCgGtCTGCcTgACGttatcttgtgag  
aGCCACGTGgggaaggagaacggcgaacagttcaaacggcagactccgacacgtgtggaa  
aagcagaacacgtgtcaaaagaacgctgttctgtttcacaatcttctccttacttgttgt  
tgaagagagaagtattaacagagaaagagagaagcaacaagtgaagaaagaaagaaaaa

#### At4g10020

atctgtctgatcaaagtttcttggttaagtaagattaacagtagagagaaccaacattaa  
ctaattaagtataaactaggtcttacttatggccgcccatagaccactaaaagtgaggt  
tcaaattggagcttgtagctatgcataaatcaatatccgactaagaccaaggaaacataata  
ttaaaaacgttacaggaaaaattggttaataacttttggtgggttacacttataagaccaa  
gaaaccaataaccgaatctttatttcaaattggagcatgtgtACGTaGCACgaacttattg  
aaccagtcaaccagatgcaaacagccaaccggattaaacgggaacatgaGCTTcACGG  
ttttatcttatctaaaactcaaaggaacaagCACGTGGCctgtacctCaGtCTGCatgc  
agccatggtgttccaccatccatcactatacgtcaaaatccgccccacaaatattaatatt

ttcatattctcaacaaagaaaaaaactccattttaatttaactgcattcctcctatcttt  
cttcttcgtttctatagcctcactaaacatctcttgttattttcgaaagtgaagagaaaa

#### At4g34131

gagaaaaaacaatagaagataactcaaagaagtatgtagagagaaagagtgaagaaaagg  
gaagaagaatgacgaatgcaatgacgtgagattcaactcctacccaaaattcctatcaact  
gtttttgttgtaattagacatgtcattgtcattgctgacaaaataaggaagacaaaacaa  
atccgacttggagataagccggttagatttattcaactcctatcataaggatatcaaat  
tttcccatatcatcaactttagaaagtttctcaaatatcTGCaACGattgatctcttta  
cttctttaaaaaacattaggttatgggtccggtttgtgattgtaaaagcgacacgtgatt  
gattagcaacatttaaatccatatcttggtgaacaaaacgggtgcagtttcggactttcgt  
taccatatattgtagttgtttgttatactgtatatataaaGCaAGCGttatctcccaa  
cttactctcttaccttGCCtCTTGcttcaacctcctaagcacattcttatctctttctg  
aaacgaggttcccaaattagctctacaaaaccaggatcttgatttctcatcagttaaaca

#### At1g03120

gtaatgagtgctgcgccagaagctgtgagagcggcaaTGTCcaGCcttttgatgaagaag  
caatactctgaagagaagagagaggttcagaaaaagaaccagaaatgataagaaaaccaca  
cgatgattgcattttgccaaattgttttttttttaggcttattatcttctgtttttctgt  
gactctctcgttgtatcttgatcattatgttaccggtataatttctctgttactatttca  
aaatttttatttattcaagcatgtactagtacaatttgatgactttttgtgtttaattaaa  
aaaaaaaaatctcaaaataaaatttaagtagggctcatataattttttaaggtccacatc  
aatttaactaaccaatcaaaagaaaaattagcaaaatcaaaaatacctttttgttaatt  
caaatccaaaagggtcgatccatgtcatcaaCAtGCGCaaagacaagtgtggagttaa  
catccacgtgtcaaacagacatcgaaaataaacagagaagctcctactttcaagatccaa  
aatcccattaataacaaaccaaagaagctccgAAGCCtCGaAataaaaacaaaacaaagca

#### At2g40100

cctaccaagtatagggagaaatagacaccaattcgggttgatttactcaaaccaaacac  
caatttgaaagctgagaggcatttttagttccagttatatgataaagtactaaacacaaac  
caaaaccaaagtattggcctaaaatataccaagccaaagttgtagaccaaactaaatgct  
ggacttactactagacaatatcggaaacacgatttaagaggcattttgtagtgcattaat  
gggcttctataaatgggcttttagggggacagaacttcaactgggaccaaataatttctc  
ttttgtgaaatcgacaaaagaaatccttaaaaacgaaagaaaacaaaagaaagaaatac  
cttaaatgcaaacactaccataaggacgaaagagagagTGCaACGTcattagaaagtag  
ccaggccacaaaagaaaaaaggtaagagagagaccaatcacaggagataacgctaagat  
aaggcttcttacatttaccatcacatataacataacgttactatttctaaaatccaaa  
aaaactatatgttataacattggaatcatcagttcttaagcagtatcacaccaactcaat

#### At4g20410

ttgaaattgacattgtagctgattttggagtgtttaacaagagatgggtcttctttttgt  
tttgaagttgtttgtttgttcgatgatgtttggagtcaaatgggtgttgaatttatagag  
tgagagattgtagagtttgagaaatgtgtaggagattcaacggttgatttctacttcttac  
ctaaaatcatagtttcagaatcatgcttattgtcatgagcttgacttgtagaatgaacc  
agaacatgcttattagttataacgtttgtatttttatatagaaagttgttaactttcatct  
aaattatgagaattagaatctcaciaaagaacagaaatcgtggaaatgggtgtaatttgaaac  
ataacaaaagtatgggtttgggtttgtttgaataagaatgtttcaaggagttaaaataaaat

atctgattttattatatactctggaagataaagtcacaataatttcaataataaaattaact  
aaaaatagaagatttgcaaattcctttgatcagatagtgaaaacgattctctctatattg  
ccgatcgcgctccaagtttgctaaatcgccgggaactttactgaaatttgagagctagtca

#### At2g27690

atcatcacctcaatttaagtgtgtttttaaaaatcatcacctcattttaatggtgatttt  
ttcttttaaaatttatacatttactttaatcaactatcacaatattatagtcagatctg  
aattaccaacaataatGCaaGACActataatcataattgacaaagcttattttcgt  
atgtacgaaaatcaataaagaatctttttgtcgcgatataattaaggacttcatgtcgac  
aacataaatatataaacaagttgaaatggtggctgaaaatgaggaatctaaagatcaa  
aataatgcaaaactgttttttaactttatcaaaaaaccttcaaattttttgtcacatga  
attgttttcaaaacatttctgttaatttctgcgctcttcaacttctggtcttgaaaata  
tgttttaactaaatattagagaacacatgtctctgtccagaataaatgagattaagaaaa  
aaaaaaaaaaaaagaatctctatttaattgactcaaaagtttctcataacacaaactca  
tctctttctctcaccttctcacaatcatctctctttctctttgtctctcatcaaca

#### At4g21680

ctataccgtaatttatggttttattcgcataataacagtggtcatttccgttttttccac  
aaagtcagattctcttcaaattaaaattttacataactacttttctgattaaataaata  
ttttagaacgaaaaagatcatttagattatctcttttaatttttattcataaaaactag  
ttaaaaaattaaaatagcatatgattattattgagataacaaaattctgtcgagaaaaat  
ccaccgaacatatattttaGCAGCccGtttcaaaacctttacaattaaattgattaaatt  
aacaccatagaaagaaagagacgtcaaagaaaggatctcttctgagttctctgactcaa  
tttctgagctctctataaatataagctctcttcttcacacttttaattgcaactctcaata  
tcactattaaatatctttctcttttcaacttcttcaacttctctcgattcctgagttttcga  
tccttttgttcttaaccaccggttctctttaaaccggtctctggataatcatcataat  
cattaggatcatcaagataaggaatcttttttgagtatatctctacaccaaattcgaatcta

#### At4g25810

cgagaaccaacaagtgatgtttttggtcaaacaggacgaaacatgtatacataaaaaga  
ggtaattatgttcgataaacataggtataaataaactataagaatttgttacaacattct  
ttagatttgatattaactgctgtttacatttgaagaactcagttagttatttaataatttt  
atthtatagggtctagaaattacttgctgtgtgggactgatcaccgattctaaagaaggc  
tcatcctttggataatagtatgaaacttgctcaataaagataagtcatacaagtagggag  
atcttagctgtgtccatacgcctatctagaaaaagcgacgatggtcaagattaataac  
tgtatttgaaaaaccaaaccgctcaccaactccaaagccattaccattagccatcact  
ttccatcttccagctgttcgaatcaggacgcccctttttcttcccaaaccatcggccg  
ataacgaaccttctctCTGaCTGCctctgctcttactataaatacaaccaatacgcact  
catccaaaaccacaacctaagctcaaagccaccaaagaaacaatcacttagca

#### At5g17330

aaattctgagaagctttttttattcacatcacatagtcataattcaattcaatgcatata  
aatttcatgtaaagcttcttttttctcggatccattcatttttacttaccattgaa  
tactttcacggtgtagtcttttttttagaaatcgttgaatatcaaaaacaagaagaagaa  
aagaaacggtgttttcaatgtgctgtcatacagattcatgaccctttatgaatctaataca  
gagtttgaaacataaactaaacttggagtttgccaaaaaaaaaaaaaaaaaaaaaactt  
ggaaataaaccttctcaaaaagatattgggtcaaagctctaaaactgaaaacgaaactaga

ggcattattctctaattcaaacaagtttagggcttgggaagaatattcacaanaagga  
agtttccgaaaattcttttatatttccccagcaaccattcaatatcattgattatt  
gatataaaacccatataaagggtgtctctcatcatcctccattcccatacatcactttcct  
cgatctcacttttctctctttatcatcatctcctggatttctctctctcatctccgtg

#### At2g19800

ttgattggatcaatataaataccatctccatttctcgtctccttccaacaacatctttcac  
acaacaattcacacaatttctcgttttttttggttatcatcaaaagtttaatactaaat  
ta~~cg~~ta~~tca~~aattccgagcaagatgactattcttggttgaacattttgttccctggtaaggt  
ttcattgcttcttttaagatatagatatagataaataatcaaatattggagattagat  
tgatattagtgcacgagaatatagaacaatcattacaagaaaaaagctatgaaaataa  
ttttgtgggtgacgattatagattcaagagtggatgaaaagaaagtgatagaggagagggga  
taatgaattgggtgttggatggaggttttgggttccaaaatcaaaggaaactgatgcatt  
cgatgctcctgatatgaatttcttgggcatctcctcaggttggtttaattggattgatcc  
atatatttatggacataaatgttgttttggatcaaaactaattacagtctctcttttctt  
ttagggattatgagaatggtgaaagcgagagacaacaaggtggtgaggaattttacagga

#### At4g38540

ggaatagcaggagtaccgagagacacgggtctcatcacagaacggaacagctgtcgatcag  
tggtttctatatggggcaacgacgagttcctgtttcagctgtctgttccagaactggcg  
cttctgtggttcaaagtcgaactacgacaatgacaccagaatgatttcGCagGACA  
acatgtcttctctgcccgaactgaagtccggagttagagccgtccgGCTTACGatcga  
acaggcaaggcctacaagaaCACGAAGCTTctcgtcagcttgccttggatcctccttat  
acgtttcgttgaatctcgtttttcttccgaaataagccacacagtggtatctctgttg  
cacgtttataaattataatgtacaattatttgcgcccctagctagaacgggataaagtgt  
gacaacataaataactattaaagattcgatatttgatgactgtaGCCGCTGCctaga  
cgggggtgccttgtttgacttgccaacttcaaccacatttctttttgttacttgaaagt  
aaaaataaataactagagaggaagaaaaacagagctttcttcttaagatcatcaacgcacc

#### At2g41230

gtcaacataatcataaatacctaaccactaaatacaattcaactaaataatttggtaaa  
taatctggatgagaaagaaaaaatgttacaagatatattttttggattttccttaaaa  
atttttttttttttttctagctaagaaaaattaaaattttggtgggtgtcaaaaata  
tacaagctatacat~~acacgt~~atacacaataatagagatagacatttcaactttcccaatt  
gccagtataatacaaaaagccagagacaaagggagaaggatcctaagacatttatcaaaa  
acaaaaagagttgataaactacagtaatggaaaatgagggttcatgatcaacggctgaga  
tttgatgtcaca~~cccaagcc~~gatgggtttgaacggaagtctttgatcacggcaagattCC  
GTGCActtcttctcttctctctctgcttcttctgattctgccaccgctcctgcccgcg  
cttccaccgcctcggcgacactcctcctccttctctactcctcatgattctcctcatt  
ttcttggcttttctccttcta~~atgagc~~ccagcctcgccgtgaaacctctcgaccctga
