# Supplementary material
Source: PubMed Central journal article supplement (PMC1203392)
Supplement: plntphys_pp.104.058412_4.pdf [file plntphys_pp.104.058412_4.pdf]

## Motif map of VP1 AND ABA dependent (VAA) class

Significant motifs from VAA genes were mapped on their promoters (600 bp 5' upstream from putative ATG).

### Legend:

p<10<sup>5</sup>    **acgt**  
p<10<sup>6</sup>    **acgt**  
p<10<sup>7</sup>    **ACGT**  
p<10<sup>9</sup>    **ACGT**

### At4g26740

acaaatccatcggccggtgccggtcactgaatTTTatatctaactct**aTGACAC****TGG**ggt  
tgatgtag**tgcggtgtgt**gtgttctcaacatttgtggggttgtttattaacttttcaggc  
tcagacttcgtttacaaagaaaatttgtgtgaattattcttattatcataaaatttt**cct**  
**tgcaac**tt**CGTGTAC**attcatacatacataggcaatggagttcctcttcagt**CttCACGT**  
**AaAgagc**gag**gtgt**gg**GACACG**ca**ctCA****tGTaGC**gggtggtgtagt**actcgagg**ttgggc  
ctatataaaagccatagaggccgaattactgaattagcagacaagaatagaaagagt  
gat**gaaac**at**tggaagAAaACGTGTCT**ctagagtc**ATG****CAAGTGT**aagacagaggaagag  
agaag**gag**a**TGTgCGT**caaagacaaggaaagag**agatgtca**atcgctgctttcgt**cggcgc**  
**GTGCATGTCCGCCACGcACA**tcaatcaaatcgattcttattattattacctcattatact  
cttactctaaagacaa**ACACaTACA**tt**TGC**actcagtcctagagacaaagtgagagagaga

### At4g12430

aagtaacatattgaaggttacgacaaatTTAACaggaga**atttgtca**acatataaaact  
tactttcgcttagaaaaatgaaatttcattt**gtgtcGACTCGT**aaagaacagaaaacat  
tatttttttccactacttttgtgtttaaagcatgaaagtttggaaatcttataga  
agtaattttattttaatttccaaataaagcatttaatttttttaaatttacattat**a**  
**agtgact**ttggtgatttgtgt**GTgCAgGTG**aatttctaattgaatctgaaagtttacga  
tgaacaatttgatgatgataaggtacttagtcaagaacaaaatattcctaaaagtaa  
aatataatcttatatttttttcttaactgaattgtgttttttttttactggtaatcag  
tttggttgatggagctttcaccaacaagcag**tgacaag**aaaacaatgaagagatggttt  
ttcatagataa**acgagtGGAT**ag**AG**gttattgaagataaagaaagcaaaaaacagaag  
ttcttgcattgaagcattggtttttagagtttattgaagcattgtttagagttttgattaa

### At2g28490

tagaagttaagagcttccgggattttgttttttattttttcagtggtgtaacaaatttaa  
attctgt**CGCACTGTCT**gtaacaacgatattttttctttgaaataatttaacattaaat  
taaaaagaaaaactaaataaatttttgaagttaatatattatggttattatctttgggt  
tgcaataaatagat**cgagtcaag**gtcgttatatgaccattgtttagt**tacgacgct**actt  
**ca**t**act**tggaatctaaggagaaaaaatgtaacatagttctcagtacttaatcacatagtt  
ctcagttcttaactctttattgtttaaacttttcatcgaataattaatgattgatctc  
caatctcaattaattatattttctaaagccaaaagagataatgaaag**gagagg**tgtag  
aaagaaaacgtaattgatcaactctaataaaaagaaa**ctg****cggt**at**AGACACG**aa**ggc**  
tccgatct**ttGCATGtCtCGCACGTGTCTG**ctcttttcttctact**taacac**at**at**at**g**  
**catgca**cccttcttagaaaagttagcaaaacattgtgaatcatcggagagagtgggaaaca

### At4g25140

ttggctctggagaaagagagtgcggctttagagagagaattgagaggttttagagagagat  
gcggcggcgatgagcggaggagagacgacgaggacctgcattatcaaagcaGtgACGTGG  
TGaaatttggaaacttttaagaggcagatagatttatttattgtatccattttcttcattg  
ttctagaATGtCgCGgaacaaattttaaaaCTaaATCCtaaatttttctaattttgttgc  
caatagtggatgatgtgggscgtatagaaggaatctattgaaggcccaaaccataactgac  
gagcccaaagggttcgttttgcggttttatgtttcgggttcgatgccaacgccacaattctgag  
ctaggcaaaaaacAaACGTGTCTttgaatagactcctctcgttaACACaTGCAgcggtg  
catggtgacgccaattAACACGTGGCCTACAatTGCatgatgtctccaTTGACACGTGaCT  
tCTCGTTCctttcttaatatatacacaacactcctacctcttccaaaatatatacac  
atctttttgatcaatctctcattcaaaatctcattctctcttagtaacaagaacaaaaa

### At1g48130

agagaagcgttaagcgggagcgagaaaGAAACGAAGagaaagagagagcttccagatccg  
acagaagttttcggcttcttcttttctgtttaaagaacttctgatcctcctaggctctgtcc  
gaagaactaatctttttgaggtaacgacgcggtttttctcaaacatgggcccattaacc  
atagtctcggcccaaacgaaacttaatacgacaatgtttgggtgtaaaccgcaaagatttt  
gtcgattatcacaagtaaaaaataaatacaaaACACtTGagtctctctagacatcgtgcy  
tcgccttagctttaagtttttctcgaaacaaaagagtattttatttgaactttgaaga  
ttatacgaAGACACGTGGCGTgaACccaattcataacaACGCCACGctatactcttttgc  
atgcaacctcaattgaacatcatcaaggtctctctctctttttctgactttgatccag  
aacctaaccagcttgcgatctctatttaatcggctcctcgacgcaacttcaacttctaCTa  
cATCCattcacatcaaatacaatacagaaagtttttctatataataataaaaaggtaaa

### At1g73190

aaacatttttgttgctcagttacccgccaaaatcatttgaagcctaagaagaaagaagccg  
aaattttaccagggttaaagtgaaaatCAttTGTCACaTGttatgcttgaactaagaat  
aattattgacttgcagaaattatcaaacgatcaaatacaaaagaacatattacaatttcat  
taacttccgattaatctgcccgtgaaaaccgtgcaatctcacagttttcccaactctagaag  
gttcatatgcttgtttatctACTTGGCACACaTGCAtgcttagtcaacacaACACaTACA  
CaTaCataAACACGTACACGaGGACAATGTattatataatccogaacctaaaggttcgct  
caaaaataactaccaagagaagataagaaagcagcACGaACAccaactcttaaggaaaa  
catctaagttatggtaagtaattgcatgcaatttaaGCTACGTGTCCAgttaagaca  
ctcaaggtctcaCActTGTCcctttttacttgcacttgccttcttttggtttcttttaaac  
tctctctctctctctcttcttcttcaacctttgttgttaattTCAAGTGTttgatcata

### At1g59730

ctcattagaaactctccTGCCAtGTGaCAtttttatttttatagtaattaatagcattaa  
tattatataggtattagatccttgaagtggtatggtgcatatatttttaacaaaaacaaa  
ttttaactacttttaatttatagcgttgacaataactaattaatctaaactaataaatca  
agtacctaggctaccattttttaattagaaaatcgatcggcggcggttggatccacc  
acaaaaataaaaaattcgtttGCAaaTGTgataggcaagctagttccttgcaaccagcta  
tatttttatgtagtggagaatatttaacaactaactggaatttttaaaaacacaaagcgaa  
actaaattggtataagctatataattcttgaaaaaataaaaaaatcaacggctagaactaa  
agaaggatagcaaattgaatcatattcctttgcatttacttatttattataaccaacaa  
attaagttctccgattaaaagctatataatgctcctccttctctcttttgcatatc  
agtatatcactagcaataagtgaaacaccatttcttcatacatACACaTtCCgaagataa

### At4g25580

cAgACGTGTaatttcgtggggcagttctcgataaacgactaatggtTCGCCACGTGgAta  
ttgtagtagctgcatctactagttccgcttccgcGCttCGTGTCTgtttcttctaccacc  
aaccaaaccattaaaccgcgatagagcatactggatcttttttaaggcccattatgtaca  
tttctggtggaccaaccattgcgcaatggaaactattcatatgatatcatttcttgtcg  
tttccggatttcagtgactgtgttatgctgtttttccaatgatcgaaacggcatggtggtt  
ggaatgggctagtgggctaacttgtgaaagaaggtaacatcgacggttcttctcGGATaa  
AGattaggctgagagCGCCACGcACAcaatcaagagccTGATACGTGGCATGACACGTGG  
Tatttcgtaagataaagtacagaggacacagccatccagaggtagtccggctatgcggtct  
tctcctctttccatactctctgactctgtataaaactttgaagaagctcctcatattt  
tctcagaaacaatttggtatgcatagaaaggaaaagaacaaaatcaaatctagcaataaa

### At1g05510

atcgtgattcctaagcttaatcggtagaatcaatttatcgtgattcctaagcttaatcgg  
aagattcacaacttcgaatGTaCATGTgtctagtagcgtcaaacGgAtGTGTtttgta  
aacaagACGAGTctgCATGTaGCccagaagctgtggactcggaatatgagtttctct  
tttttctgaaaaccctagacaaTACtCGTGTACGTttgcctcataagctCAgaTGTCat  
aaggggtttgatctttgcggtgcatcacaatccttcaataattttttacctttaccctaa  
aatctcgtCTACACGTATCaccatatttgtcttccaaggttgtttcactatcataatc  
agcgatctctTGACACaTattgactaggtccttgttgccttattatcctcaagtgaagccaa  
atAAGCCACGcACActcggTGACACcTtCaatggtTGCCAtGTGTCAtagtccatgcaaa  
tgcccacttcattttattaagaegagagctatacaaacaccgtctcttcttatcacttg  
ctgctagttataagaatcagacagaagttgcagagaaaagagaattaattgatgggtgta

### At3g22490

cgatctttcttcttcttgtccaATGtCtCGgatataatagcttcttcacaaactcttcgat  
cccttcctttagcgttGCACA TGTgggagtagctctcgtgacggttctctcgaccaacgc  
ctagcctcctcctcatgcaaggagcatttctcgtattgggtgaaaggtttaattggcgttgat  
gaccagagagtattcgcctCACtTGcACcctcaggtttagttatattatattatgtTGCCAtG  
TtgagtaggtatgtattagctctcatCTCaTGGCTTcagaaatggtcagaacagctttg  
ctcattggtgttatggtgtctcaatattGAaACGTGGCCAatggtgtacgaaacatggaa  
aaaagtatthaaacctaaatgacaaaactctatctcagtcggctcgaatcatcatcttgc  
taaggttgctataaacctggaaacTGACACcTGCCtcttAGtCACGTcaTtgacaaaTG  
ACAaGTGTCAaaatctcataatggttgcctcaccactcatgcaactctctcttatctttatag  
gagttgtTGtCACtTttgtatgtaacacaaaacggaacataacataacaaaacagagaga

### At2g46950

ttcgttcagaaaaagacagtcctaaaatgtaataagttataacaataataaattgtcctct  
atgacttcaaaatattttattacagaaatggcaaaatgccaacgaaaaatctggatcgc  
tgtttacattatttgtggttGCCttGTGagacGAtCACGTGaACTtttagcttttacacga  
tttTcTACGTGTGTCAatataccaagaacaacatctacaacttctgtttctaacttGt  
aACGTGTaagcaagctacaagaagataaagattacttcataagcaatgacgGCActTGT  
tataatcgatgctgttaaagactgtccccACACcTtCattagcgataggcgattttaga  
atccgaagtttctttatTGTcCGTtacgttgtcttactttcttccatgtaaaataaa  
ttcccattactcctatggtattttggttcgggttagaattttattcattatcttcaaac  
agcttgtgcttatatcagaaacagaAGtCACGacgaccctcacactacacacGACACA Ta

aaattgaaagccccactgccaatccaccacaaagcaaaaaaatttgtttgttattcgaa

### At2g36270

gattaatattttactaatcatcaggtaagctctagattatcttttgtttaaaaccgt  
attaataaatgattaaagaggaaaaaatcttctgtgtgataagttcgccttaagaagaaa  
**acgagtgg**gtaagatattttcctcttttggtaacgaaaactttattggaagagtaaat  
attagtttattttattgctaatttttagtatcgtttgtcgc**TGtCACG**atgtggaccgttct  
tctttat**tTtCACGTGgAC**cgacttaattaccttctttcattcttgttatttcaatatt  
tttacgtcattttaaactccactttaccaaataattttatttcttcttggagagcatcaa  
ttatcaaataatt**CAatTGTC**ttttttcgtgatagttgaataagggacaactattaagtg  
agtttcgtgaatagctgaacag**gGACAaGT**aactgaagtttggcaaaaataacgatga  
atthaatatataagagacaaaattgttattgtcgtttagggtggtatccatatttcaatat  
agtttgtgtgaatacagatataaaaatggttattgttgtgtatgat**GCAgtTGT**taaa

### At3g27660

ctacattcatacctaagctagcaaagcaaactactaaa**agggtcgt**caac**GACAAGT**tat  
ttgctagttgggtgatact**aCACacGGC**tacggcaacattaag**taaacacat**taagaggtg  
ttttcttaatgtagtatggtaattatatttt**cgaaacttgg**attagatataaaggta  
cagtttagtgaataatttggtttagcgggttgaattaacc**GGATatAGgagtca**tatac  
aactgtgaaaaaggataaatacaaaaagggaagatgtttt**tccgacacacaagc**taatt  
aagtgcacgagaggaga**GCAatTGT**aaaatgaatgttttgtttgttttgtacggtgga  
gagaagaacgaaaagatgatcaggtaaaaaat**gaaacttggaaatcatgcaaagcca****cac**  
**cttcccttcaACACaTtCtTACGTGTCGt**cttctcttactccatatctcctttttatt  
accaacaaatataatttcaatcccatttata**TGTaCGTtctcgt**agacttatctctatata  
cccccttaatttgtttgctcttagcctttactttatagttttatatcatatcaatcgac

### At2g23240

aaacacaattttaccgttttgtcggaaaaatgcaaaatgcaaaaacacaattctttaaaa  
tcatgatttttaatttatcaataataaaaatgggtt**atacatggg**cttgc**ccata**t**gggaca**  
tgatttttatttggatcatggacatttttcggaccattgtccattatggaccgtc**caACTTG**  
**GCc**catagaaaaaactgtccat**ACGaACACGccc**aatgggtccctggacggaccatt**tgac**  
**agct**atagacatagtccaaaagtaagtaacaaaactagggctctgagaagggttataa  
aagaggagatttttagagcataccaaaaacaattcagctttatctaattctttttttttc  
ttttttgaaaccattttctttgaccaaataaaaattgtaaaattttcagtattctatttc  
tttgtcccaac**CGaACAtGctTCGtCACGACtCGGGAT**ag**AG**gaga**agtTGtCACaTGAC**  
**ACaTGt**tacctacatag**AGGCCACGTATT**caatt**ctcttgca**tcgctcagatattcttatc  
tatatgaaatgtaaaaaggatgagctagtggagataaaaaaaaggaagagaaaaacaaaaa

### At2g42000

ac**gaaac**c**g**aactctcttaggct**GCCcCGaGagtcg**tctttatgtatatttgagtttcc  
ttcatgactctaattac**cgatcatgtctg**ttcactctctcgcggagaccgagtcgactca  
ctgttggtaagttggtaaccctaaccctagatg**GTtCACGTCATGC**tttagaccatgtaa  
actcctaacaagataaaagtcagatgagaacaatcttttggtttcagacc**caactcgt**aa  
ttttccttatatgagttggtcggatccggatctaaccacacttcgttacatacttacacc  
cccaagttaggattaatggat**gCACtTGaCt**tgggggaattttttctactttcaatgaa  
**GCAaGTGTCAACGTGTTG**aatgttgttattgttaaaagtaataaccat**tgAGCAtGTGTC**  
**AaGTGT**tttgatt**CTgtATCC**ctggaacaagcacgctcttgttgggcttgataatatttt

tcaactagaaaatattgataaaccaaacacacGACTCTGGgatgatggttgggttAC  
GTAGCACGTtTgaattcaggatgctTTGtCACGactgaggttaagaggagaaggagccaca

#### At2g23590

tgtcgtattggtaggcaaagtttagaaaaaccttctcttattatataagaagatatatgt  
agttgatgaagagtagaaaaagtaagagaaaaggaatatgatagattgataagagtaaaa  
aatacaaaaagtggttaggaagaattataatagactctcgttaagattaaTGTCACTaata  
catcgatatataaaagaaaaagactaaacctaatttactcaatgtaaacatttatgtgt  
tatgtgtggatgatgaagagtaggaaaaaataagaaaaggggaatatgataaattgataa  
tagtatgaaacacaaaagtggttgaaaaaatattataatagactctcgtataattaatatca  
cataatacaccgatataataagaaaaagactgaacctaatttctcaataaagataaac  
ttaaagttaaataataactatTtTACGTGTTactaccgtaaacttagtcattgtgctctgt  
cttttttgttataaaggaatgagagaagaacggagagagattgtagagtcggaacaatGA  
CCACGTGGCTTaatgtttgGATACGTGTTtgataatctaaatcagaagagtaagaaaa

#### At2g23110

taataaatgactagatcatgatcgttctcttgaatgagtttagtgaataagacgtttgggtg  
agaagtggtgacatacaaaaatgaagataatTTGTCTgtttttcatgatgcattgtc  
atcatctaccattcatcgaatttattttatcacatataatgaatcagaaaaagaaaat  
aaatttttcaggtagatggaatgtccaatataaatttattgaatattagattatataat  
tgtaatagtgaaatgttataatatttctgtgatcatataactttatataattattata  
tttttagaataaatgataaaattataaagataggctttcttgcaaaaacacgtcaaaaac  
aatcgtataaaaacttaaaaacttttaaatgtttttttgttttttttttttaaatgca  
tgcttctaggaccctagtttagataacgtaaactttaacataaaAGCACGTATcagag  
aagcttactaattgccaccggtataCCGCACGTGTCAgaaatatacagagcTATACGTGag  
CtatataagcaGCAAGTGTaacctctCACBGcAagcatttagcaaacgcatacaag

#### At2g21720

tggttgagaacagagttaacttcaagctcagatacatgttgCtTGTA CGGATgaAGagt  
ttgagaggagagtgagagataaagtggagagaagagagagattcgaagctggcctcgact  
ctgaggattctcaaccgtcggatgagaacatctcagatcaggagattgctttctcagacg  
aagcggagaagaagagagatttgacagaatgaagaGGATtTAGcataatgaatagttctg  
tacagtttaacacaattataaacgaacGaAtGTGTgaatgagttctatattataaatact  
aaaatgagaataacttggtctttcatgtcctaagaattcgaaaaagcacttttacagttg  
tgaaccaaacgctcaatcgctctccgccatcttttctcttccgggtgctcttgattct  
ctcaactccgccgtatataatttcaaataaagagagagtcggttttagggtaaccagaagt  
gagtgatataattgatagattagagagattgggacttttttaactatagcgataacttc  
gggtccttaagttgaaaataattttcttcagctattgactgaaatgacatcgttttagt

#### At1g23070

AAgACGTGCAAttggttacacattgggccgtcatcatggttgggccttctcccaatcc  
attaaggctccatgatagataAACACGTAAaactaatctttaagaatacatacatcatag  
acaacttAGACACGTaCGcatacataaaccaaaataactaaTGACACaacaacgacaact  
tattatggatgattttgggtctatcttttttaagaccccaaatcttctgataaattt  
ctctaatttgctttcttgggtcttctaataattcttgcattagagatagtcgacatgacca  
attccgctttctctatacactgagttacttttcttccggcccacataatttatttcaagt  
tatttcattttaattcctctaccaatgttctattttacagtcacctagttatcaatc

ttagaggcggcga**gaAACACGTGTCAg**agaac**GCAacTGTgGCATcTGTCa**gctt**tAGCC**  
**ACGTGgAC**attacaaccttaaaccaccattgagatagaaagcaaaaaagaaaaaacag  
aaacaaaatgataatggtgtctgatctatatcaaaaaatgtctaaaat<sup>1</sup>tttggagaa

#### At2g36640

ccctcccaagaaccgtcaaaaactcaaaattatattgataaccgacttgatcaataaacg  
g**CTctATCC**aatgattaacttgcgtccttatttttctaaaatgcttgttt**ccaagt**ttt  
gatggtgaggcaataaacttccaataaactgtgtggcaataactaagtaatctttcatatc  
tctaaattgcttgtttccaagtt**atgtg****ctc**agtaagtttgaaatggcgaatgtgatct  
tcacctaacattttcctcgcaccaacacaaattatgatatcaaaagatttgat**acgaccga**  
ccatcgatgcttgcttgcttatgtcttagctcttaa**GtCATGCCAtGa**acactcaagaat  
catgat**ctcatgcatg**aaaa**GTcCACGTGTCA****TAcCACGTcCG**tagaagataaagctaagt  
aat**TGTACGTGGCA**gc**TGT**tgcgtccctctatct**AcCACGTAGC**gtctcaacagaaaca  
gagcattactataagaagtaacaaaagcagctcaactgatagcacaagttaagaattct  
aaaatcgtaaagttctaaagcggtttttcatcaattttcaagcaatcgagaaaaagcaa

#### At4g21020

ttctccgatcttagaacgaagactgcaactagggtttatcaatcgacaaagatcgaagaa  
cacactttat<sup>1</sup>tttcttactctatcgacgagaggataggggtgtggttttagggtttcgacgt  
**egggaact**gatgaattcttctttgcccagaccttcggattaaagatgaatataaataaaa  
ctgaacgtaaaagaaa**ACtTGTC**ctacaagaagaagaatattctag**tgggc****cg**tgaa  
gtcggtt**GGAT**tg**AG**gttgactaaaa**ACCACGTGGCTT**gaaacatacaatttcattcag  
gtaactttgtctttttccgtagtggttattacataacctacattaaaccgatgcgtttc  
gtatcaattcacccaagaaatcaaaactgtagagcaactccaatgt**CGAACACGTGTAC**  
**GTtcacCcACACGTGTCAg**atacttagggtgccagcttatcttgctgttgatctatag  
ct**GCaACGT**attaatataaaccgacctcgaaaataaaagagagaagagaaaaggat**CTca**  
**ATCC**aat<sup>1</sup>tgaatcatagcaaattaagtttcgcattcgaagtttttcttgatttgataaaa

#### At4g37060

aaacttcaaatttcgctgatgaaactta**AtCACGTATTacgg**gttttactat<sup>1</sup>ttta**GACA**  
**CtaG**attaagtgattcctaccaattaggttttctaatgtaaatagataactgatctccaa  
gcaaaccaataaactcattattagttatgat**tcCGTGGCAT**tagttgtagttccaattga  
tagatgtctttagaacaagtctgaatagt**GGATtcAG**aagg**GAaACGaGTCg**caaaaaat  
caaaaaaaaaaacaagtcagtttctggctgtttat<sup>1</sup>ttttgattaattgcaaa**GTcCACG**  
aaagaaaatatttgtttcttaattcaaat<sup>1</sup>tatctattgcaactatttctcgtaaattaa  
tttgtgacagcccaagctcgatgaccctaattaatgatagggaatattacttgctttaa  
attatcatattccacataaaacatatatcagcttgtatgaagaaaagtctgaccaaatag  
tgtaaattctatgcaaatgaaattgt**GCAtTGT**atataatattgacct**CTacATCC**aa  
aacttctaccaaat<sup>1</sup>tcgattcaaaatctt<sup>1</sup>gtagttcaaaagaagattgatcaactataa

#### At2g02120

tattggagactaattattcatagtagttaccattta**AACACGTAaT**gttttcatttagat  
acgataaaaaaagttaacaaaact**CtaGTGTCc**ttgactacact<sup>1</sup>tttcttact<sup>1</sup>tt**TtgACG**  
**TGgTC**actattattgtggactcccaatatctgactaactcaaat<sup>1</sup>ttacctttcttcat  
acgtttttttatctgtttgttaattaattcca**gaatgagttgtca**aaccagtaggattt  
ct**ctGCATGtCGTGTAC****TGcA**ttttaaaggacagattaacggttatgact**aggg****tcg**gt  
aaagcaataaatcgacaaaattagaaaacaaagaaaatgtggaaaaagcagtc<sup>1</sup>aaaaga

agaaaaatgt**tGACAaaTG**ttacgaatttggtttaaatcaaaagtgaattatccgagaaa  
gatgatatttacccccAAAatctaaacaaatacttaaaaatgcaattctctaatagac  
tatcaaataatcccgatacctctttatata**gtgccatCTtcATCC**ttagtaatgtacacac  
acacacata**aacactt**atttccaactctgtctctctcaattttctttctctttctccaac

#### At4g28520

ttggctactagtgtct**aaacatgca**accgaa**CAgtTGTCgaGACAaGTcGC**agcatataca  
atggat**caaacacGCCtaGTGTCGCCgCGTcTC**gct**CA**GTGT**CACcT**tgttt**cc**tg**gt**  
**t**tttttttaatttttcataagttctttttgttttatcttcaatacaaatTTTggctgtat**c**  
**t**tg**caaa**ctcttcgatcatatcgccaa**TATACGTGaAC**actggtgatctaattt**gt**tg**g**  
ttaattggttaaatttagattctattctccggtttaaagtgaattatagtatcatggtt  
aaaacattgtaagtaagatgataataaaatgataaatttagttgatgg**AtaACGTGaaGc**  
aaaaatgagatagatacattttgattttgtcgtatTT**tGACA**ta**TGC**ggagagtga**GCta**  
**CGcGcatg**aagatcaaga**GACACtTGC**tcgagctcacaga**GtgACGTGT**aaaagcttag  
actgaagt**ccccatgcaaa**cctaat**ccTACGTGGCT**caa**accacgagc****CACTTGA**CAat  
atataaactctcctaagtcccgttct**CTtcATCC**atctctcacaacaaacaaaagaaa

#### At4g27170

caaaaccaaattaaaccagacaatacttcaggagaagtcataagaaatataatTTTTgt  
tcaaagggTTTTgaagtaaaaaaaaaaaaaaaaaattatgaagaaacaatattgaatattga  
**tGACA**ta**TGGC**gggagtgatttggaaaagtttttcttgttcatccaaaataaagattgt  
agtatcaccttgaagtaattataatgatgactatgtatatcacatttagactatgtatac  
taatttatgctaataaaagattaccacaaatttagagttatttgggaaattttgttctttt  
ttggctttaatttcatgtattatgatagacaacattaataatatttcatggt**GTtCAC**  
**GACtTGTCa**ctctccaatttgagttcgaacaccta**atcgcgaca**acaaccttatagct  
tctctctctcgcacaacacacaa**tCACaTGcAtgca**atgtcttaaaaaaaaaaaaat**tg**  
**catgcat**t**ctAACACGTGaTC**tc**catgcaaa**actcctttcttgccataaatacccataa  
ccccttactactcttactcaacaaaaaacatacacaagtaattaactaacaacaa

#### At4g27140

aataaccaacatatgtatTTtaaga**GACACtTGGa**ataataattctaaatatcctaa**CTA**  
**CtCGTGTCCGT**atgTT**TTGtCACGgtGAaACGTG**agaggactagttttg**tcacc**cg**gtcc**  
ataacattcttagacatacattactttgggagtgaaaaacattaagcttat**CTttATCCa**  
tatattgtcttaccatcaatagacaatatccaatggaccggtgac**ctg**cg**tg**tataagta  
atTTTcaagatgctaaaactTTtatgtatttcagaattaacctccaaaacatttat**TG**  
**ACAC**actactactctttccgatttgactctca**actag**tg**ca**tttcaaaataat**TGACATGT**  
**CAG**aacatgag**ttACACaTGGt**tgcatattgcaagtag**acgcggaaACtTGTCACtT**cct  
ttacatttgagtttccaacacctaatacagacaacaatcatatag**ctc**cg**cata**caaac  
aa**ACAtaTGCatg**tatt**ctTACACGTGaACTccatgcaag**tc**ct**ttttctcacctataaa  
taccaacc**ACACcTtC**accacattcttactcgaacaaaaacataca**CACaTaGC**aaaa

#### At2g42560

tttgtttcttgactgaaacaactcttaaataagaccaa**cgCACtTGA**C**ct**gtgaaatga  
gaaa**ACaTGTCa**gaaaagattatacaacgga**GGATgaAG**aatttagtatgctaatagaaa  
ttttccgagtaataagctaaatgggggcttagagtaagatataattgggcctaatagagat  
gagtgggcgggctgaagaagccatatctgatgaagtggtcggctggttcgtagtagag  
ataaaatcatgagactatgagaggcaaaagtgcaccggaaga**CTcCACGTGCACaTGTA**

CGgaaaGATACGTGgaGgaaagcaagactattggctcgctaattgaaactgatctctt  
cccacaagctgagtcacCGTGcCTctcCTACACGTTCaataagtaaactCAACACGTcaC  
acaccttctccaatcttcatgaccgccccaaattttgtcttttcggttctatgattataa  
agcaggacttaagcagctcgataagaatcaacaaagataaagaaaaacagaaaaagcatt  
atcaaacatcatcttgaaagtaaaactgtgtttttggaagtgatcgttagcattaacia

#### At4g27530

atthaattctttttgggatttgaagttatatgaatttatccccgggaaaaacgcattaga  
gaacagttggttttgtggaagaatcggattcaacgaatcatatgcttccattatatatg  
agaataccgaaaagtctgaaatcttgcacaggtcttaattgcaaattcattttccattt  
gatatgagaataccaaaaagcttcaaccatctcgacattagtagacatattggctctgatggt  
ctctcctacgtatcttgcacgaaagaacttgcgaaactcggagagcgGTaCAgGTGgta  
gtccgtagtctatagtagatataACACtTGCAacattttgaacatattgggctgggcttat  
aaggttcgggccctttatcttctttagagttgatgatgataagaagacttagagtcac  
tttttttagcacaagaatctctgaatcagcctttgcttctgttgcctctggGACACGTG  
agaagcacagtgattAGCCACGTGTTCTtctccgacactaaCTcgATCCtcaaagtact  
tccatcgggtgtgtatatagatgagagcgagagctagataatgaattgaaagtgtagaaa

#### At2g33520

agtttcacaaaaaccaagtacagctcaaacatttaaagccaaaatccggatttacttggg  
gtttgattttgattctgtcaattcaagttctagttccatagtaattctaaaccaaattga  
ccaatatttaagttagacctatcaaaccaaaacttttagttttgtcgacacaaaagaaaa  
cagagttactacaacaagaaactatgatgggaccaaactactgtaaaccggaaagtccgaa  
ACACTTaCggagtagcggttattatttaaaccgaatataaagcaaggggacttggaaattt  
taaaatcaagcctaaccggaaggtaccggcctaatttggtataaaccggaagaactgcc  
atthtctTCGT CACGgtgtttggaagcCAACACGTcgAcaaaacttatTGCCAaGTGcCt  
tccgctcgataaaaactaacctctcgttgttagaccacaacttcagtttgttttcataaaa  
ataaaacgagagatcatgtcttgtatcttgtgaaagtaattctcaaaagatcactttttaa  
aatcaaacctctttcaactttccattgcccGAaACGA Ggttgcaaatctaaagattcaca

#### At4g31830

ataaaggtagaggacttggaaactagccgttttaggaattacgaaaaatataaaggaaaa  
atggtaaatgttaatgtatccgttggagagatgataaagGCaACGTaacgggttaGGATtg  
AGcgacaaaACTTGaACTctgatagagaaagtgatttcacggctctcttaggaagactggt  
caagctaagctgtttctgttttttgtttttgtactttactttttgttttgctaagtggaac  
tgggtttattgggccttgaagttgataaaagatgaataaaagacatctgcctaaagccc  
atatgagaagcagaagacaaaaacctccaactttgggcataaattttgattatagttaaa  
agtccagacccaattTGgCACcTGGCtTtagttacgattctaagGCATGACACcTGCCtaa  
tatgtttattacagaaaataaagagaatcaGCTAgGTGTCccttattgaacacattaaca  
aactccaacgacAcTACGTGTCtCGTGaCTcttaCTatATCCaaaaacctatagctaaa  
gctgaattttccatgattagtagtccaaccaaaaaaataactgaagaaggcataagca

#### At4g32290

tgtcattagaaagcttaccatccaacggtttccatcaatcCACtTGtAagactaagaacc  
CtcCACGTAaAatcgaatatttttatgactccttctttaaattgtagctttgaacacacta  
atcaaacgaataaattctttatacatacacaatcacattatgtgtggcctatgatttagt  
cagatttatgacaaactgataaagtaacaagaatgataaccaaatagaattcaattcata



tatactcttttcggataaacagtacagtgatcaaaattattagaattagtggccaaataa  
aactaagaacggtatgtatattaaatgacaactcgagagaagacgaatacttttctatat  
aaagatgtaaaattccaaatatgaaatgccattgaattatataatttctataattagtgt  
ctcgaattaaatatataatttcttaacgtaataataagatacaCAAGTGCaccaaatac  
ccactctctcactctagaaacCAaTGTCgttgataataatagaACACtTcTtttctctc  
tctaaaaagcaaaagtagtctagtcactgatttcttctaatacctccggtggagtgagaga

#### At4g20820

ctcatacaactggttaaccaacaaattattaactcctatatatgaatcgtccttagcacaac  
tttaatatgagatacaaaatgcttTtTACGTGAtTtacaatcatcagtgaaaactcatg  
ctaAaattggttaaagacgaattaTtTgCaggattactaatcaaactagcaataatgtaa  
tttaggtttagattttttgtaacattaaaataagcccacataaccgocatacctaataat  
actattataactaacaacaatatataaccctctaccaattgcttaacatcaatccaaaata  
gtcccacttaatgattcagctcctacgacgactgtgtagGACAaATGCattcaattatc  
acatccatctaataattatTTGGATCAAGACGTGTgattctatctatccacaaacttttca  
tatactacaaaaatctataaattgTTTTcactttcaatttcttatacttactccaca  
aactaatttaaaattagtaaatattttgttcacttctgtctagtagtagataaacttca  
ctcttcaatcttctacataaagtcaaacttcatttgttgcagaaaacaaaacaaaaaat

#### At4g12130

taccatattgaaatggcgtCGTACAtGTtatcataataaagaatgtaccttCACaTGcAt  
acaaaaaaataaaacatgtatTaaacaaaacaaacatattagtgtttattacaaaaaaa  
aattatactttcgtttcctagaagACGACAAGgtcaggatcattctcttaaacattgat  
acgaaaaaagaaaatttctaacattctaaagctaataatgtaatacaacaactttattt  
tcttaTGTcCGTaaaccaaatttctttggaaaatttactaaaatgctctgttagttataa  
atttagattattggTgactggtcgtcgtaataaacgggaagaaacgaccgaatcttaaaa  
aacatgtTgattgagaaaaatctctctttttgtggtttggttcagtaatttcatcgaAC  
ACtTGCTaagcaaccgcataaaacttccgtacttttTACACGTGTCGcaaaccaaagat  
agttcccaTTGACACGTATTcGAtCACGTGGCTTgtcctgagcttttctttctctaacG  
CAaTGTttaaccacagTgGCCACGaaagaacgataactaacagagccttcacagagag

#### At4g18210

taagtttctatttgtctatTgCgtatgggGTtCAtGTcctccacatagttgcagaagaaag  
tctgaatgaatattgcctacacataatttctccttagacttaactcatctcttggtcaac  
aatagaggcatctTtTgcatgtagaaagactacagataactaaattcatggaaagagaagag  
atatgggtggcatttactgaatgtggggccaagaaacaaagaaaacttagacggtgaccga  
ttcctaataccagaatatataacttagcatatctcaccatatacaaggagcaatCACTT  
GGtagcattatcaaccaagagaattgataataagatacgttagttcctccttgtccatct  
ccaagggtggtgattccacatccacatgacggcGGATcaAGaactacaaatcattggtga  
gtaagcataaaccagtttTgtggtgaacgtcctaattctttcatcttcaaaaaaaaaaaaaaga  
tggttatgatattttataattcaatatatgaaacgatcgacaacaaataaactaattTtT  
gcgttattttcactcacttaccagttcggcagggaaaagaaccaaataccaacagttcaag

#### At2g41070

tttctaaggcaaaataagctctcttttctactatttctcttttctcttttctactatttctct  
cctgtggagaaactcaggagatagagagagagagagagaagagaagagagacatgtatggt  
tggttttataatctctctactcatccaagatttTgtctcagaccacCACTTGGACaga

gagaaccaagctcctttctctctttttctcgatctactccttcttaatctccttttttg  
aaacttgaagccactttcaacatcatccttaaaccttttgttcccttattcacaatctccT  
GcCACcTctcatttctctagttgagttggtatctgcggtttttaagcactcgaatactgca  
tgcaaatccctgattggttggttagtaccttagagattctcgatttttttagttggttaga  
ttgaaccaggattactaaattggtattggtttctggtgtaaaggctacatatatgggttct  
attagaggaaacattgaagagcctatatctcagtcattaACGaGGCaagaactctctctat  
agcttaaagctccatgaggttcaaaccacttaggaagtctcgaaaaccactaggaagc

### At5g12030

atcgatctcggagataattagggaggaagttagatttgagagaaatgaagcgagaaaga  
ggattaggggttaaagattcttcgaattgaagaagagtgacgatgaaattgctgacttc  
atctcacttttagtccgatgatcatataggttaggttagatgatattgatacttcacctcaca  
aAaGCCAtGACTCaTGAatcctctgcggtttgcggtttcaaccgatatgacgcggttcaatc  
aatttatacactaaattcgaatgaaatcgtaccaaacggataaatttaacatccttaC  
TaaATCCaaaacagaatacatatgggctgaaaacgaattgggtctgggctgaccgaat  
caatcgcttttctctacattcgtctagaaatatccatctcaactctcacaacgatcaaga  
cgtttctcgaacgtagagaagcgcttttaagttctataacaccgaaacaatcgctctct  
ctacattgctctagaactatccaactcaacttctatttaatactttcttacatcaaaatc  
aaaatcaatcaaaccaaagaaaAaGCCAaGaa gcaagaaagttaacacaacagctaagaa

### At3g46230

ttagattaattggtattaataacttggtcatcaaaccactaaaaatCcCGTGTcATcttc  
gacttcttggttaaattcaataaagagtgtaacttttcattgctataacttaataat  
gttgtgagaagagaactctagtttacagggaccaacaccaacaatcaaaatttagata  
atgaagaatagttgctgatgcatgatgaagattgaatttatcaacaaaagataagtggtc  
attataCAACACGTGaTtaattgcatgggttattaaggccattaacgaagtcctatggta  
aaatgaaacgGCATGGCgTtcaactacccacctaataatgaactGCATGTcgtctcaaccatc  
aacatagaagcttcttgaaGCCACCTGagaaatctggtagcgcgactcttgaaAGACACG  
TtaTaaagaaacggaagaaagaaacctgaaatttcaagaaacttgcaagagctttctatct  
cttatcctcttctctaccatcatttctcctataaatacgccaACGcACAtaagtgtttg  
cattcgaagagagttctagcaaaaacaaaacaaaacagagcaaacagagtaagcgaaacga

### At1g03890

gctatataagttcattaatagatgctataggtttttcttacaaggcacacatttgattgt  
tattttctttcatatacactgaatGTaCATGTGTACACtTGGCATAcATGGCAagattat  
gtgttaacaatatagactgtgccattGcCATGCaATGTGACTcCTGTggccatttctatca  
caAtGTGTCAatcttgagatccggtggttatcctctaatttactgattaatttatgaa  
catgtataattatttatatcatatgatctcgtaagatatcttagcattttccaccatag  
ttattagtaaatactctagatggattgatgtaaataggaaagttaaattaacacacccaaa  
aaagtaactgattaaaagcatacaacttaataatcagattatggtaactaaatcagtcctc  
atgcaaacctccaaaaaattatACGaGTCa caactcttgatttttttccgggttaacaaaa  
tacatattttcatttgatgcaaccagaataaaaacactaactatctcctttaataacat  
tttcctACGaGTCTacgacgctctctaaacttcttatacaaaaacaaaacacacccaaat

### At5g54740

aacttttcttgattatatgtaaatatgtcatatctatgacctaagaaactattgagaatt  
aatgataatatagcttatataacttgggACGTACATGTaGCgcattaggataagatcacia

tgatttatttatctaaatcaatctattagTGTgCGTttacttccg~~cgatcaag~~cctaate  
cgaagtagat~~gtca~~attacaaaaagaacttcaaagaaaatcgaaccaagaaaataaac  
gaat~~tgacata~~tacctataccattgtaatgtaataataaattaagggttgttgttggatt  
aacaacaaaataaataaaaaat~~acaagtcaagagcatgcatgct~~gttgttagatgcy  
~~gaGACTCGTTC~~catcat~~tCACTTGACACATGCACA~~cattactgaacttcgaacaccta  
tccaaacaaaactccatt~~cggtgt~~atggtccaaatgctcacacacaa~~ctcatgcttatt~~  
~~ACACGTGaAtGCCATGCAaaTGTC~~ctatctcctccataaatatattcattcccactttca  
cttca~~CTtcATCC~~atccatcactcgccaaaaaccttgaaacctttaaaaaatcgaaacta

### At1g03880

cttctcattttccgttcgtcattactattttaaattactagtagaacagcaacaaaacg  
agaatacacattacttagagggtcactgataatgatgtcttccaaaaatgtttaatg  
ccaaaagtagaaaaacgtaa~~TaCATGTGgAGTGTC~~acc~~cgatcaag~~agagctatttccc  
ttaa~~cca~~at~~tgGTGTCA~~aattagtttaattatctaaac~~CATGgGTC~~gacaattataattc  
gatttcattgtttattgaataaatcataaccaagactaaactgtagcgaatataaaaca  
attggtctacactatcattttgttacaaaatgttgaataatttatttttaaaaaataaata  
ataaaatcttgacccaaaactaaaataatcagacctaattatcgaatgtaagtatgtta  
ctgattattggattattggat~~tatgcggtct~~atttgttttcgattattggatttgtctatt  
tttattgggtgttatgggtgttatttttatttttaaaagaactctttaca~~caagctctc~~cta  
taaatacataaactccataaccacaaaagtaagaaagtaaatcaataaagaggaagaaaa

### At3g60140

aaa~~gaTGACAC~~acatttgaaatcgtagccgtactacgcgaa~~atACaTGcAC~~tcttcgta  
tgt~~taaacactt~~taacagtg~~ACGTAGC~~cataatggtgaccacattcaacagtcaacacia  
acattactttacacacaaatataatgattatataacatat~~GTaCATGT~~aagtgaatgtga  
gcaataatgacgggaatattcagagaagacgatggtgaatggttagcagtgat~~CACGgGcA~~  
~~cattcaaaactgactgtggacaaaaaaagCtCcTGGCcT~~taaatatgattgtgccccaaaa  
tagtaca~~aaaactaagaacc~~caaaatggaatt~~cgagac~~ctatataataatataatgtata  
tagtctttccttggaagaaatccttatgttattaagaaaaataactataagttatctctct  
atctagatatgatataatgtccaaacatt~~tcCACGTAG~~atgacgtatattaccgaggat  
aatcctctatataaggaagagaagctcgagtaataaatctcatcactttgaaatctcaa  
~~agacac~~caagcaaaaaaacaagacagacaaaaaaaagagagagagagagagagaaaa

### At1g54860

aacact~~cgacacaACACaTtCatggc~~catatata~~caa~~catgctacattgaagtagcaata  
tatctcaacataggat~~cTGACAtGTGGCAgGT~~tgagga~~ACaTGA~~CA~~tggtcg~~gaggagga  
~~TACACGTGTTGgTAaACGTGGCCA~~gatttgtggtgatccgatg~~ACaTGgAC~~aaacacia  
tgtctccttcacacact~~tgacaaa~~tttcttcgtaagaagatttattaattaaaattta  
tttactatataatcggataactataccttatatgaaaataaaaaaaaactataccttata  
tgtatataacatatataattttaactcgaatttgttgt~~gtgcatGCATGACACGTGaAG~~  
aggatgtgcatta~~atACACGTcgT~~cttttgcaaaaacgaaacctcctcg~~GTGCCAaGTGT~~  
~~tTGtCACtT~~tagcaattcttatcaagagaagctaatcttagacctttaagatactata  
acaaatagagtacaggaccaacaaaattacattctctttgcctttgcctatcgcttaatt  
ctgcttttattaccagagaaagcaagaatataagaatcagaatctgggtgaagaagaa

### At1g04560

cgttattaagataaaagagaaaaaagaagttctagat~~actcg~~gtggttaatt~~CACtTGTC~~

ctctttcattatccccaaccttcctcagataactttttaccaaagtgaagaaACTTGGC  
Aaaattatgaaaattttaagctaataatttcataatttaagcaatatgaataaatgatattc  
taccaatACaTGGCtattttcattgatTCCAgGTGgattatcataagtaattaattgctg  
acccaatatatggttagctttggaacatttattatgataaaacataaggagataataa  
agaaagcggtttgagattcgagctcaatgacaacactggCTatATCCaacactttaaaa  
caacgtcaAGACACGTGTCCcacCACcTGtAagtagctaaacacaaaaggtcctcttCGCA  
TGGCACGTGcTCcttggcaACGACAcataagctcgggtgtatataactatgtctCACaTa  
GCccttccatatagatcatcaccgagcaagtttagTtTACGTGTGttgcaaagagaagaa  
aggtttcgagtagcaaaagagtaaaactagatctttaggagaaggtaaaagaagcaattg

#### At1g60680

accattctctgtatagtcttagtgacctatcgccatcagcatgaggttaagcgtcccagct  
gacttaggttttagagtttaggcaactaatggctaatagccaatgatgagtcctcccatcat  
at ttgaacattttaccattagtttagagccaatgatctggaacctgcctacaagcttccaa  
tgagacaaactatAgGTGACACaaattgtagatagaacatgaagaccaaacactaccta  
ataagacaaaacttgctactcaagaagatcgacattactcattgactcaagaccatgaa  
agaaaacaaatatcgAtTACGTGaaGactactgaacacaaattgaTGACACaTctttgaa  
gaaatatcacttaAACACGTaCGtagttttttgtttttggttaaatctcatgtaagaaag  
atattttgtaaaagcacttttgtaaaagacataggcaatttgagagtttttttaatacaca  
ccactcatcaaccaacttcaacaactactccactcagttctaaactctacaaaagagag  
aaagagagaaagcaggtgtgacataaaaatccatggctgaagcttgcaaggttaggagga

#### At1g15550

aagaaaaatgttggatataacttaattccaatgactgaggaaataaccaaatcaacataaa  
caaaacaaataattagactacaattttttttgtctctttctttcttttgaatacttattg  
tccttttatatacgattaatcactttcttaatttatagattatattgtaatggataga  
tacggtttaacttctacatatgaacacaatataccatattactacotcaacttcaatttg  
aattatacatagtttgacaaccatCAaTGTGTatgtatcttatcttgcaataatcaataa  
gaaattatattttttcttcaaaaagaaggaaatggcgggacctctataattttctaga  
ggtttggtTGTtCGTattgtattaatccaataaacaagtagaataaccaataatattgg  
accaaACAagTGCtttaACAaTGCttttgctcctcttggtctctactccaccactat  
aaataaaactctctaactcttccaatctcccatcaccacacacacacttctcataagaa  
aaaaaacacaaacatctatcaaatttacaagttttaaaactaattaaaaagagcaaga

#### At2g41260

attgaaaaactggttcaatataaaaaataaatataatcaaaaaatgaaaaagaatataa  
ttagtttctcaagtggagaactttaaaaaacgcataaaaataacttgatatacatctattg  
atcaaatattatattttattttaaactttaattatataactaatattttatataactaa  
tatttttttttttgagaaaccatgaaggtattttactgatagagatgtttttagctaaa  
gctttaacttcttttttgaaaaacaaaagctcgaataggcgaaaaaaaactagaaaa  
gataaaaaagatttcaagaattaaagattctatataatctttctcaatcaatttatgag  
acttctcgatcatatctaattagcatggaattatagtgatcttttgatagattttctttac  
at ttatatatggtgtatatatatatataatccccctaaataaatatgtcaattaactatta  
tcttccctcactcgacatagttagactggtttcttgctGCCAaGTtttgctgccaactat  
aaatagtgctgtgctcatgcaactcttcaatataagtgttttgtgtaactaaaacaaat

### At5g64210

ga**TtCACGTGCGC**tctgtctgctgaac**gccactt**caagattcggacaaacttaaaaaatg  
tgcattcgttttttttaaaaatagttatctttaaagtaagcaacagttggatatg**AGCCA**  
**CGTGTAt**tcagcagtat**tcGCCgCGT****ATC**agctgataacgtcattttttatttccttctt  
gtttcccctact**tACACtTtC**tttcgagaaaaaacagagttgaaatcattttctttcagtc  
agagaacaagcctcttatct**gag****aagtga**atctataagtatacagagag**agtggtcgt****ta****aga**  
**tgagtca**actcattacgaaagcagct**ttacgagt**tctgcttgtctgcggcagaggaaact  
gtaa**CaTGTtCGT**gagttctgtttcctccacctctgttatgaaaagtccgtatgagataa  
cggcaccgatgcgaatt**catgactggt**gcccgggttttggcgatttcaagatcggctc**ta**  
**agcatgtGCaAgGTG**tgcataatctgtagatgatcctcacaaccttataacaattgtac  
atgataattaggatttgtatatttctaaaatttgaataggaaattttaacttgaggtgga

### At3g12580

agttttgagtc aaattgggtaaattttttgggtattttgggtcataaaaaataactagatta  
tctcttataatcttatgagttaatttggtaataaaccatttatttgggtcaaaactatttt  
tttccccatataatataccaatcaataataaattcataatataatttcattaacgcgattg  
aaatactagtaattaattgaggactaaagaaaaagtaatttctttttatctttaaatag  
tgcaaaaaaaacaaaaatgtaattgggtgatgaaataacttgttttcaaaacgggagtt  
actatt**tgaca**at**tt**aaaaaa**agaccat**ctcgaaggagctagaagcgataacaaaataaa  
aaggaacaatagtaattagat**tg****gcgca**aaaaataagatccaacggctgagatct**TACtC**  
**GTGaAC**gttctcgaaagctctttgccgaccactcttcatc atataataacaaa**caact**  
**ctct**gccttctcttctcacacaatcataaacacacaacactcacaattctcttaaag  
ctcacagacgaattctttctatttttaattctttccggcgaacaattctgatctctaataa

### At1g71695

agaagcactaaaacaataactcttttttaaccggttaagtatttgaaatagtgcacacaaaa  
ataactaaaaagttt**cg****tg****ta**ctctaattagtagtagtactatataataaccattgtc  
aatatagtcctaactgatataataggtggaccac**TGtCACG****aa****ct****tg**aatgccagcgggaa  
aaaaaaatataactcgat**cg****CACGTATT**tatttgctttaatggttgatccgaaaaagaatc  
tctttggtaagaaaaaaagaagcctttttctattgacaatagtaat**tg****gt****ac****gt****tg****aca**  
**ca****gg****gt**cacagga**ac****ga****cCGaACG****aG**accag**ac****gca****aa****g**ctt**cCAC****tTGA**tatttttt  
tctttttgaaaagcaagaaatataactctcctttaatcacaataaatatataagaaggaa  
aagacttcagtatctctttgccttttaacataagaaaaatataataacttaaaagataga  
aat**aagacacac****aa****gg**actgaaggacaaaattgcctataaaagcaaagtccatctattc  
cacaagaacaagaaaaggcagagaagagagaggctctgataaaaaaaaaaacaaaaaaa

### At4g32920

aagaaagagttgtgag**tg****ac****agt****t**cttacaaaaatagagattcatttggtaaaaaattggat  
agaagatattttatttagcatttccccttttgtttttc**GTtCAaGTG****a**aggtttcaacaaa  
attaaagagaagatctcttaatcacaacaattaaagtaaagtttaaagactaaaaacaaa  
gcctaataaataatcagtttgggtggtatataaact**AGCACGTGTCAA**aaactaattggtag  
acaaaaaaag**gt****ctCACGTGTAA**acgcgaaagcctttctaaaaaaatttcttcagcat  
ttaccaaaactaaa**gc****gc****cc**tctcgttcttcttcaacctcttctttgctcatctctc  
tctctctacaagaccaaacttatcttttttttctcttctctctgtctttttacacacag  
agctctgttttcaagctctgttctgttt**ct****ct****gt****gt****ta**atctctgtttcttcaatctgtt  
tttttcttctaattttgaattctcgtacagacgcaacggttatattggtggttagcctc  
tttgttcttccaatcgaatgtctcgttgttttgtgtaaccatggattctcatctctaga



tccagctcaacggttataaaatcctaattcgtgaggtttctctgaagaacaaacacaaaa

**At2g45290**

tcgcccaattgtttcataaagc**ccaaa**tgggcaaataattcggtaacaaaagaaggtcata  
agaaggccactaattgcaaacataacaagaaaaaatgagcaaaata**aAGACACGTGCTa**  
**tGCaACGTG**ggaatggttgagagaaaaaaagggttcgctcagctacgccgtcaccgactgggt  
caataccggagttggtgaattggtgactaaaatgtatttcctaaatctaaagcaattttg  
cccccaaaaaaaaaaaaaatctaaagtaattaggttcttcaccaacccttgtcataac**Ca**  
**TGGCTT**ttgcttaacacacc**aac**catgcgcattgtcaatctatTTTTTacttaaattaa  
attattatTTTtaataattagcgtaaaaagcaatgattagttgaaaattaaacaaaagaat  
tagattcgaaaaattgtaaagccatagagcatcacagccgtcaagatt**gtgtcct**tt**CT**  
ga**ATCC**aacggtcagat**cgagatct**cattggtttattaatagcaacagctctcctaaaaata  
ggtttgagagaagctttctcttctatTTTctctctctcagttaaccagagagagcatca

**At4g24120**

aacttogaagtcaaaactagctataatggttatctttgaaaagtaactcaaatataagga  
gagtagaaatt**CTACACGTAaT**gctgtc**CGaGaCAT**ttaattatggacgatgtgattgca  
gaaacaatTTTgttttcaaaccctctcttgatcaaaaaggacatttaaattcattgcatcc  
acttcaaccac**ACACaTtCA**tt**TGGC**tgtaataacatttcaaagattcttaca**aacaag**  
**tga**aat**gtca**ttaaatgtcTTTTtagaacaagatgctaacgacaat**ctACTTGGCCACTT**  
**GaC**tt**gt**ataccaaatTTTctcccaactTTTTgttcacagaa**tttgcgt**ttacaactttgg  
cgtttgtgttttgacggattcgtctaagtgggacaa**TgCgCGTGT****CGGACATGC**gca**ctt**  
aagagggtagagacagtgagttctttagctttccttatattctctttcaaaccaaaaaag  
agactactatTTTTgtacttagactaaggaaagcaaagttcatttctctaaaaaatt  
ctggTTTTataagtatcaaagacaaattcagctctccatggaaatagagcaaagaaggatc

**At4g28390**

cccagaaa**GAAACGgGTCa**aaggagtcagtagcattttcgtaattgtaccttctcttct  
gctcagtttcgctTTTTtagtttaggaccagaagtcgagaatcatgtagaaacctactctt  
ctcgcaatTTTccacagctctctctctctctcgttaacgcttcggcgaaaaatccacg  
gta**agcttc**cgactccagaagttctagctttatcattaatgcttctctctctagctctctc  
tgtTTTTgttctgc**TtCtCGTG**aattctgttttctc**gacgcc**a**CTCGTGC**ttgatct  
tttagaaacagaggatttaattgagctgctgcaactaggttttaatttgtgctaattagg  
tcgcattatag**tgacaga**ttgaaat**gtgtc**tttaacgaagctaactaggatcgtat**ga**  
**aatgtg**ttgatgatgtctctctgtTTTTgttccagttttggttatgatcattctTTTT**t**  
**aagcatgca**aatatagaaatTTTcgagaaagcaagattttgtggtgtttaatttgtatTT  
ttgttttgttttgttttgttttgcagagtcagcttttactgatttgtacaaaaaa

**At2g16660**

tacgac**CGtACG**a**Gtate**caaaaccctaattTTTTTTTTctccaaacccaatttttagta  
ccaaacatccaattcgtatgattgctaaaaaaaaaaaaaac**ACACaTGCA**ttcgtatca  
gctagtaaa**ttacacg**atctctctgtatctaaatTTTccggatactaaaaaattgcaga  
attgatcggaaattaagtaatactagatctaaccgtatataaccagaagatgcatcaatt**c**  
**caagtggccac**atacaattatTTTcaaacgaccggaacaaaaaaagaaaaagaccaaac  
cat**tAgCACGT**cg**T**atTTTtaataattctTTTgtcataata**cat**acacggtttatactttat  
acat**ACAC**t**Ac**tt**taacCGTACATGTC**gg**gtcgt**acTTTTctggtctcattccaca  
tcttataattaaaatatacaacttgctaattgttactaattgttcacaa**aaatgtca**aaa

cctaattaataaaaacaaaacacgcaagcataaaaacccttttaccttttctcttctataa  
aacggtccatACGgACAAgctccacgaccacacACACtTtCtcatcttctttctacaaa

**At1g05560**

tattgtttccttcccaagtaatctatagttagaaagttcctgtaactttcatagatatat  
gttaattatccccatttccataagtttcggtccattataatagaaaagtgcattgagacgt  
atctttttcatatggaagacgaaaacattgggttctccattctaaaagtcaaaaagaaaat  
gtataCACtTGaACttttccacataggctcatgataaagacaggactaatcaatcattca  
ttggtgataatggtctcaattacctggtgctagttatttctacatttgtatagtgcaata  
ctgtttttttttctcttccaaataaaaactacagtactaaaagaaagttggtaatcata  
aaagttataaaaactcaataaaaagcaattactctgtttctttttcactcttattttatat  
gactgaaatgaaattgtctatatgttgtttttgtttgatggtcattgatatgtaaacat  
caaatctgcaaaaaacaaccgcaagtttgattatacgatgaagcgtttatctagtgag  
cgtcatcgcaagcgtcacaagttatgtggtacaatttgcgtatggttgatgaatacgcga

**At3g50770**

atccgaaatgaatgaacCAaaTGTCcatagttctggttttttttctcctaaagtgaata  
tattaagagacactaaattctagaaaatagtttaaaatataataatcagtaattgtcca  
aaaaatgtgaatacttaaatcaaaatcaggatacgattgtcacaagaacaaactttcc  
tagataatgtatattttatattatcatattatgtatgcacttaagacatCTccATCC  
atgagaaacctacaaagtttttcaacaaaaaaaaatattaatattatattataatttgat  
tatttttataaaaaagttttttggttaaaaaattaaaccaatagtaagatgagaattgt  
catgatgggtgtacaaagtatctcagagtatctcagagtttctcacttgagaaaactttc  
tacactctctctcttctattttttatttttttttttttaattgtgagaaattcttatg  
agataccacaatagagatgggtcttataaatttatcaacatgggtgaatctctcatggtat  
atatagaggtgatttaaggctaaatagaataacacactacagcatataaactcaatgat

**At5g51210**

atgaaagccaaaagttttaccatcacacttttaatgcttttctttttcacaacaatctt  
aactattctctgtttactattcacacttttaagttttaccggtcacacttttgaggcgaa  
gagctactaattcacaacaatcttaactattcacacttttgagttgaagagctactaata  
ctattctctgtgaGCCAAgTgttttgggcccattggcttaatggatgtggattccgaac  
ttccttttaattctttgcttctatagttctatagagtgggggaatgggagtgaccataac  
atcacgaccgatcgataataacgctcAtCACGTGacttATGtCCGGTcCAgTgtgta  
ctatagcaaaaaaaaaaagaccagaCGtACGTGTCGcaaaaaagaccatctctactc  
atACACaTGCAacggctgcatgaaGACACTTTGACACGTGACATGGCtcaagcgagc  
cccaccagcgcctctctcttataaatcatcattacttactccgaaaacacatcactac  
cttttctctgctaatttctactatttgtggtggaggatataattataataaaaagaacca

**At2g43820**

ttctccatttcggctctctcttatttttttccatctcttttacttctccaaataataac  
aataaaaagcttcgattttgtgtgtgtttgtatttacatcttgacatcgatattcttttca  
tcaattttttaccaaaaatgtaataaaaaacaaaaaaaaaccaaagctgaacaagacatg  
gtttCTccATCCgtttatattcatcgtttgatggttacttaacaacttatttcaaaata  
gtacatatcatggttggttttttaaaaaagtatacagaacagaaaagCACaTGGtagac  
aaaataatgaagccaaaattaatacaagaagaagttcaacttgtatttataacacatt  
ttctttccttgtaaaGaCATGCaaattgggtttgttttcttattcccattttttttta



taataaaaagaagaagagtaaaacaaaaaaactatcatttcttcttatcgcaaaactctt  
atctaagcaagaaaccgacaaaacctatatctacatatattctcatcaacatctcttgag  
acatattcattttggttaagcaaaagattttaagagagaaagggggaagaagtgagagag

### At3g01100

ggcagcataagagtgttttagctttGCAtcTGTggttgggatcttcatacttcttccagtg  
aattatatgggaacagagtttgaagagttttcgacctcccaaagaagtctatggataac  
ttcagtatctctaagttaacgatggatcaaataagtaagaactcgaagctatgcttaa  
acagtatcccgattttcACtTGTCCGTaaccgatctcttatgcttGtAtGTGTtttgctt  
caggctgtggatccacttttgcgcaatatacatcttcacggcggttgtttgttctctact  
ttactatgtaagacgcttttgttttgtccatccattctactttatatcgccatatatggg  
aacataaaataatgtttggactatctttgagagcacaagtacattttaacaaagcgga  
ttgctcatctttattcatccaagcctcagccacaagaatttacagttctgggtcagtggcg  
tcctcttgtaaccgggaacagtattagtgagacagtagaaaactttttcaggggaatatc  
attcttcCTCGTATCtttctcatatagttgttcatcggacaGACAAGTgaaagtctca

### At5g44120

agctgtttcctgTCGCCACGTcTTttcactcgatcgtctttttatagtttaccattatct  
aataatgcgatataaactttttatcatttgCACGTATCaataattgatcatcaaagacttt  
cgtaatcgtaacataaaacattttctcaattcgtATGTGACAgttttatatatatata  
tatatatattacgataataaaataaaataaacaatatgacctattacaaatacaaaaaa  
gagaaatgaaaccgctgtatataataaaataaagatttgtcctattacaaatacaatgtg  
cctatctcaaagctgatgtgtaagaaACATGCACtTGaAtAaGCCATGCaattgaaAt  
GTGTCAactccatttattttttacagagtgaaagccaaaattcattttcGGATgaAGtcat  
aaatagcaatttaagtgaaagtgttaattgtacatagtcgactctatatacctgggttctta  
tctcattcaatttatcctcaacaactttaatagaaaaatatcaataaattccctataaa  
tagcttcacataaTGCAAGTGaгааaccacaaaaagtaagaaatataagaaatacaaaaa

### At2g22240

tgcaaaaatggcgaaaaatattttaccatctcctgtggtaaaaaaaaaaacatttaccatc  
tccagtacaaagtaagtcaataattattgttgaaggacctacgcactactactaggccct  
agttcaaaaattggtctctcaCGcGCATcacGAACGTGACACccacatctTGCCACGT  
GTCCAacagcttccaacaacagatcgCgCtTGGCaaccCACGCGTtTCcagtgggcaa  
acgatgtcgtttaactgcagtggtcccacgacaacaaccgcttcttcttctcctcatccctCg  
gGTGTCTtcgagtggttccacagatttacaagaACtTGTCttCACGTtaAtcACGCCA  
CGTGTCTgaacccaattttcaACGTGTCTctcacatttctcgaaatcgactcttttagtg  
ttctcgtcctctctgggcttttagactgggctcgaaccatctccattccaccgataacat  
cgaaacCGCCACGTGTCTccctcctctgtctctcgtctatatatccacgctCtTGTtC  
GTcgattcgagatcacacacacaaccaccaaacacaaagcttttcaaaaccagagaaaa

### At2g02010

tacaacaaaagtcaatgtccttttagtggtgataccaatataagttcgaatttggtttct  
agcttattggtataaattccattgacagcaaaaaggaatcacgaaaacaatataatctag  
tactatattcacatttacgcgtaacgcgtttgtaatatccacataattatGtAAGTGTg  
aattgatcaaatcgcgggagatgctaaataaacaacaaatcaaaatcactaataaaatGT  
CACGataacttagaaagatccaataaaaagatgacggtcggaatttgatagatagtaa  
taaaagtattcgtgtttctaaaagttagtaattcattggtctaaatattataatgaggaa

aagtcattggtaaggaaaaggtttgaaaaaggagcacataaataaggaccagcgatgctt  
cctttCACGatGCaaaacacgaaatgaagaGACACaTtCtctctactatatataccattt  
gctcctcttctcctaattccACACaTtCttcttcaactacaaaacaaaaactactACA  
CaTtCtttctcttggttcatttcaaacccaaaaatcaaagttcgaagttgaaagaagaca

#### At4g25000

tattagtcgggctaattaaaaaggaaatgaaaattcaaagtaagttagataaacatgatc  
attcacaggtcagatggttttaaaaaaaaaatcattatggtgtacatCACaTGtAgacaata  
cttcagaattcatctggactaccagaattgagttacctagtacttctcaattctatttta  
ccctaacgtctaataaataacaagtactctagcctcttcgttttatgattcctctagga  
aagttaatggtacggcccaatcacttttttaacagcccaacaacatatattagctcca  
aatatcatttttccctagaatattctcaacctattgtccactcAAaACGTGACAAaTG  
gaggtctaaaggagaccatacttgactcattttagagctaggatcagacagagtagatt  
ttttgccataactccttgtaaagtattcacatttcccaagaaaaatagactgatg  
aagaataatcagatatgacaaggcCGTGTCTGtttaggttacgtaactctacaaggtt  
agggtctcaatataaacacacaaagcagatagaagaagcaaaccattcacatcagacaa

#### At3g50980

tttaagtatttgtgtggtgtaataatgatgatgtggctttcttcttcttcttctgctaa  
ataatataatgtaagtgatggtctttgaaatataaaaatctacttctggtttcgtt  
tatttatcttctctatcgttcaactattccatggtattaaaatacttgtgagttgTGACA  
CaTaCaAcCACGTATAattCACaTGtAattatttggttaattcaattctttacaagtttat  
atgttcttttgcatacaagttatcagggaaacgaccGCAGtTGTttggcaatgtatatta  
ctcaggttttcaattcaggcccatacggcccaataaagtgtttttacggatatcgagtt  
aaaagaggtgtgtcgattataACGGACA GTGTCAcactaaccaaaaaccaagctctta  
cgtaaTCGCCACGTGTGTACtTcaacgcaatttgataataatcataatactatatgtga  
ttatgatccctatccaaagttgcggttctataaaaataccattcaagagcgtatacatCT  
ttATCCatcagtggtcttaattttgtctatagctaaaaaagggtcaattgtaaaaggaat

#### At2g47180

tagaaaagtaacaagaattgaaattttcgacttttaaaagtgtttctcttttagtggttat  
ggaaaatgagatctttgtagatagagattactccttctgataattcttcaatacagtggt  
atctacactgtttcttcccgtatggtttcagatcttgttaaatacattagcaaatga  
ctttaataaattagcaaaaataagttatgacttagaaaaaaagggtgtgtattaaactaa  
aatgcaagaagaggactagGgAAGTGTacaatgcacCtCGTAgCagggaaataacatggt  
ctgatttcccacaaaacaccgtagctagctagctgcttcttagcgttttctccgtataacc  
gtttggtttaaatctctccgtacggctccactttccagaactttcacggtttcacaaa  
cgccaatcaccaccgtctgttctctaTACACGTGTACGTatcagatttcacgatcgt  
aacccatccaagcgcctatattaaccctgtttatcccgtaccgtaagtcctcatcagca  
aacacaaacacacgactagataaactCTaaATCCtcacagcaGAtCACGTGcTaatacaca

#### At4g04750

atttctcatggttgaagttacttActTGAActTGAAttgaaacatatatagatgaatat  
ccaaaacttaacacaccaatgatthagaatTtCATGTGTctcttattgcattattta  
agaaaattTGcCACTTatgatatgaactaacaccagtaactccccaaacatatattat  
taaccaattattttcacgcatttattttgaagattcgaattatgatttttgtcttttctt  
tgagtaagttttttttttttttttttttgaaacaaagagtaagtaatacttaaaaacaattcca

tgtccataaaatcttactttatcaaaaaagaatactattaccataaaagaggtaacacaa  
tctgtgttttaagttccactacttcaggagaccaacaatcttccaaactcaaatacaaaa  
aggtttgagactttttccaagatttgcctcttctttctttattctacctctaaaacaaaa  
atcctaatcgagttctctataatattcaataaagattataattcttcttttatcttttga  
taaaacttgct**TtCAtGTG**aattgtgtttcactttgatttataatctcagattccaaaa
