# Supplementary material
Source: PubMed Central journal article supplement (PMC1203392)
Supplement: plntphys_pp.104.058412_5.pdf [file plntphys_pp.104.058412_5.pdf]

### Motif map of VP1 OR ABA (VOA) class

Significant motifs from VOA genes were mapped on their promoters (600 bp 5' upstream from putative ATG).

#### Legend:

p<10<sup>5</sup>    **acgt**  
p<10<sup>6</sup>    **acgt**  
p<10<sup>7</sup>    **ACGT**  
p<10<sup>9</sup>    **ACGT**

#### At2g21820

ggaagaagcaagattggaatcttgatctaagagtaccattagataaacacagtaatcttga  
tcaaagaaccttcatgattcaaaatcccaaagcataactaattgtgaggtcgacagaga  
gagagagagtaataaattagtggtcaataattgtttctca**ACGTGgTgt**gggtggaaaa  
tttaatatTTTTTtatttcgTTTactgacctgcttaattggattctattgagccatttt  
TTTTTTTTTgggtatcattatggtaattgaagtaataatgatacttaaaattgttattgaa  
tatgaaacttaaaaattgatgaagagtcttctcagtggtgaagtacctttcactagacagt  
tctttattcataagcatgttcgataacatatcaagaagcataaatccaacagatgataag  
ggTcaaagacgacttcttttggcTaaactta**cgACaCGTgA**ccaacaagataggtctagac  
ttctgaagaa**ctgcccacg**tcttggcaaggtggcaggttttaagaccatggcttgagggca  
taaataagttttgtggacaaaaggggaaaatgagttaagaaggatcggtatcatcaacga

#### At5g06760

agattatgcattgtagctccattatcattgtgactTTTTgctctctctTTTTgtttt  
caatttgTTTTatgCGactcgctttgaaaactttagccattctgtattgagctctgaag  
attcgacgagttctgtaagtta**ccgatcac**agttaaaagactttgatatgTTaaaaccct  
tatattacagctacatactattTTTTgtcttaactcttaagatatcatgcacaataatata  
cttgTTTTgtcttaacctatcgattacaaaaccgggtaac**cgccgacatgagggcga**act  
ctaaagcctaac**ACGCGTCA**acatctatcttctcaacgactcaaggctttcc**AaCACGT**  
gta**ggacc**aataactgaaacacaaagcctaccacctcttcttctcttctttcat**gacac**  
**gtctcacTgACGtGTcg**tcaagaacgtaattaaatattaaactatcgtgacgaacgCGag  
gcctatggctatatctatgggacatgctcggtgagcaaaacaataaaacaaaagtaatcag  
aagatatctttgtaacatctttgaatttcgctaaggaaaagagagagattttggtaaaaa

#### At5g52300

atgatgatgaagaagagaaacgaattttgaaattggcggTTTTgaatttttaagaaattaa  
aaaatatccccgctcgattttcaagagggagatggagataccaaagcaactct**cgccaactt**  
gtcgtctTTTTaattTTaattgagtagcttatgCGTTTTaaatgTTcaaaacagcacaca  
gttgatagctgaattgatTTTTctTTTTgCGTTTTgttatatttaaacacacacagtg  
catttgccaaataactacatgatgggccaataaacgt**ggaccg**actaaaactaaataata  
gaagatacatcgataggcttctctaaagatcggataaaaagataatgtcgcatagccacgt  
agagagcaactggctgaga**cgTggcag**gacgaaac**gacgcatc**gtacgtgtcagaatcc  
tacagaagtaaaagagacagaagccagagagaggtggTtcggccatatgtcatcgttctct  
ctataaactttatggaaactttgttctgattttctcagagacacgaaaagaaagaaaacaa  
cactagaacaaaagagggTTTTgattgattcacttgaaaaagagaaaacacagctttggaaa



### At1g62710

gaagaccgggttcaattccgggttactatthttctaattaaactgggttaatagtctaattt  
caaaattatthtttagagctctgggttaattaatttagtgccgttgtaacgggtgaaataatat  
cggttgtgggtccattaagtgtacACGTGTeggactataatthtgcattctctctgttgt  
gtcgcgaaagcagaccaattcgttgattttatgagatcagcagagtaatatthccaaaatat  
tcaatcgtcgacatcacaccattthtaattcgtatthttttatatttatttaatgtaatat  
aacttagtthtttagaggaaacatatcaaaattaaataattAACACGTAAaattacatcgg  
tataatatgtataggagtthataaaattaaatttatcataaaagcatatgctaactthta  
ttaagtgcctthctthtttaataatcagggtggcattaaatataattagacaattgatttggt  
tgattatathtttggtgacaaataaattattaacaccattgtctaaccatcctthtgcctth  
atagttctctthattctctcaaaaagcctctctthctctctctthtgtthctcgtcgca

### At4g23050

ctaagaaaccttatggagagtattattctacaatgatttgaagtataactactaataattg  
attacattthaaattcaactataattthattgttattgttcttcaatcaacttgaactthga  
gttatttgggcacattactthtttagaggaatgtgaatgtgaacattgaagagacgtgtatt  
ttattthctcttgacaaataaccgttggaggtataaaaacaccatcaactcaggccat  
ttggcaattggcggaacaagaatgggtattatattgaggttaattctcgtcaatcaccact  
thtaaatcgtgacaaattcgtctattatctctcaatctctthcaacctcaattacatcg  
gcaattctacaagtggcagcatcctattagtaacaaacacacggtggcgttaagctaattg  
tcgtagtgthttataatagctggggtthgttaattatggcgTcACGAGTgatttaagaagc  
agctgaaaaataataaacaatgaggaatgccaacgtthtaaaattataththtaattgt  
gaattthcatcagagtcggatcttgatgcgactgctcaaacagagtcaccggcgattacg

### At4g16690

gaactaaagaagacatgacactaattacaagtcattcgtattatgtgtcatACtCGTAAa  
thttatcatatthaatctagtagaatagthaaccacataataaccacattthaaactthcatatg  
ataaaaatataththcaataatctccgtthaaatataatctatgtataaatcacataththta  
tagcaagcaagthctccaattagaatctthcatataagthaataagthacaaaataattat  
tagggatcccatagthtaattagctthagaatataataggcattthcaagaaaataactca  
gataatthaaagattccagthtttgctcagataactthggaatctthaaattatctgaaattthaa  
atthctthtttacctthaacatcthaattthctthtttggtgtgctthacaatatctthtttaca  
aattthaaatgaaaaatggaaaattgagctggtagcaaaattaaatacaaacatttagac  
cctthtgaaaaaggaaaaaaggatcgtacgttacgtthtatctccaactgtggacc  
aaactgcaTAACTGTAAaaaggthgagatagthgtaaaagcattgatcaagattcatgcaa

### At2g45210

cacgctaaaataccataatagthttgacactactgtthttthtttctgattgtgaattthtga  
ttgataaccatcaaaacgtthcagtgataatgataaatgtaggctaaaggthaatggga  
cgtgtccataththaatgtagattctthcgggtthtgactatctgccaagcaagagaaatag  
gcagththtaattcaatccaacggtcatagaccttagtctthcatcaaccgtthcattthatt  
tagactccatataaactcctthaaagacctthtgtctthcactcattctthctcttgatct  
ctthctthttaacgtthtatactthtatatacatcgaaagcattthctthctthtggcggthcac  
atcattthtcgaattthgtgthttthccctagaaattgtctthttthttthctthctthtatagag  
aaaatcaagaaaatgtaaaaaagattgatataattthattthctctgthcaaatgaaatcac  
ctthtattthgACtCGTAAgtccatgtctcgtctcaactctthaaatctctattthctctca

gatctctcaaaaagtgtagttttgtgacaaaaactgttttttaaagtttagctataagaag

### At2g37770

cgattctgcatttcgctcggcgcaatataatgcggttcacccaaaaACGTGTacttgga  
cgttcacactcgagataatctaaatgaactcatatacactcgagatggtatataaaactca  
tctacaattttggtggtggtgtaaaaccacataatttttcttatcacaagatttttgaa  
aaaccaatcacaatgtataatattctactattgctacattatztatgaaatatataaaac  
ttttttcataatatgaaatgaattataaatcatgtacgaattgtccttggttggttgagag  
ttctgtcttctgtgatacgtgtgaattgtggacacaaaaaagtgtcagtcacactcgaga  
ttagcaagaggaaatctaaatgaacgaatttaactcagatacgtccacccgtccattggt  
ccatgtaatgatcaatatctgacgtgacaatataactaactaagaaagtactagattaca  
gaaagaagaaatcaatttgccacgaatctcccgcctctgtcgcctctcacttcttctc  
accctttaatagctagtgccgagtgccagtggtgcttgaacaaccaccaccacatctgata

### At3g51860

caaatgatataattatatttattatgtattgtactagctagagtaacgaatcaactaaga  
tcacaaacggatagtcggataccaatcaaaagtgttcaattctgactcttgaaaaacttt  
atztatcttcattttgaattgaatacaattatctaactgtaactttttttcttACCGTc  
Aatctatagaatcaagttaccctttctagagaatcaactaactagtagtctagtaccttc  
ctcaatacaatagtcgtacgaacgccatttatctaggtaccctcaaattttggtcgtc  
tcaacttattagttatctattactagttgattactcaatacaaatccctaaatagagag  
gatatgagagttgcgatatttaacaaacctaccaaataatgatcttctgcaaaccaaagc  
aaaaacctaccaaagaaattatcttaatacagaaaaaaacaaaaggaaacttccg  
ggaagctgctacatagatggaccacataaaccaaaacaatAACACGTagtggccacc  
tatatataaaaaacctgacgcaacacaaacagatgtagtagaatcaaacgtcttaaac

### At4g14130

actcagtgttctcagctcacacactctttttttggttctctttctttttggacagctttcat  
tttctcttttcttttttctattttggttcaaaattccatccatattaaaataggcctgat  
catgagaataaaggaaataactaatgatgagtttctcaataatgcaataagatgcaattat  
tatgagctatttactattgaaaatgagcaataaatgtcaaaacacaatctggttaagtt  
agagcaactccattgtataggattcatgtagtttctaagaaaacaaaatgtattaatatt  
ttacttttacatccaaaaaccaacttatatgagtaatagaaacgatcctaataatagga  
attttagagattttctctcatctgtttcttaacttttcaatatttttataaaatt  
gtatgagtttctactaagaaactactgctggagttggtcttagcttcccaatgcttctcc  
acatatatatatgcataatctccttcttaaaactcatctcacacaaaacacaaagctctc  
atcttcttttagtttccaactcaccccacaactttcatttctatcaaccaaacccaaa

### At1g62570

agtttctgtaggaatctgggttctatttctcctctgcaacctccagctctctcatgaatctg  
gttcggattctcttttcttctgtttctatataatttagatacatggttttataattctat  
catatgtctattttgatataagatattttaaaaatatataatttttcataaatggttatg  
gtctatttctatgtaaatgataatcattagttctttttgtcaactatgttttttttccaac  
aaatttagtatgtaaacctttttttactaccggttttataaatcgacgggttgatcagatc  
aactccggtataacacacataagtttctgttatcaaaacaaaacaaaacagatttttt  
tttgtcaactaccagtgagattagctTACGTGTcaagaaaccggataaaaaatatataa  
cgtatttgggcaatcagctaagatattaactaacgaggagttcattattaaaatggagta

atgatgttttcagttttctatataa**AtCACGT**cgagaccgtagagtcttacacaacaatc  
cttcttacattttctaccaacaaaacacaaaacacaaacatagcattcaaaactttgaaaa

### At2g37760

tggaaaattgatttctctaagcgtagactttaaccctaaaaggggtgggtctcgtggcttttg  
atgtgtcaattgtgtgtgttttcttttaattgtataaaagtcttatgaatatatttagttta  
ttcgagaacaattgtatgaaatggttagttaatgttttcatggatatatagggtgtaaaac  
aggttaattacgttacaatttcttagttttgggtattaatgcaaaaatgacataatatc  
aaacttttaagtaaattgatatttttactaatgttaataatgaaaccaactaacaacaaa  
aaaaaagaacaaaccaatttctatttggtttaagactttgacagtacatcacttttagaa  
ataaatgccataattatgttatgtgcacactgcaaaagaaaatgaatacgcacaattgac  
tataaagaaaacgccttttagtggccatacatttttagcattttatgcggaagaaacaaa  
gtgctatttctccgagttacgtatgtttcttttcttctgcatctagttttttttgcat  
attcatcaccttctctcagttttcttcttcaatagaattatccagaaaacttttaagag

### At2g22660

cgataatccgatgcgtatact**ACaCGTtA**aaaagtacattgaattttggtttaggccttt  
tctccaattagtttattttctgagtcagacaaggcgttacattatgttcgccttttttag  
ttttattttatccatttttcgcaaacgttaaaacttaagacacaacaaaatatataaac  
ggagatatgattgaggggcatatttgtcattttcttgtgatcgttgatttcgaagtcgct  
ataagagtataagtagcagccttgaaaagtgttggtcattctctcgaagtaaaacttttct  
ctca**gtg**at**cgga**ataaaattt**tcggcg**aagaagtgaagtttccggcgatcagaggtgagt  
tttccgtagatccttatcctagttgctacttgtgtgacttcggtgattaattttgatct  
gaatatcaaaaatcgggttttaagatttccagagtcctgatttttctcatgcacatgat  
cttccaaaattcatagggcttatgcaattgattagataaggatcattttaggtcaaaatc  
tggt**AtCACGT**attgatttacttagttgtttgcattttttgatcgttttgaaaggtgat

### At1g32170

gatttgattagattttggttagataaagaaatagtctagctatttctaatacacagttgct  
ttaactcaatatttctttaccttagttaatttatataatttttggaagatat**ttgggtccag**  
ttgttaatacaaaaatttatttaagtctttgcattatgttaaagggtttgtttcctaaaa  
ttgcaaatcactataaataattgcatgaaattcaaatcatgaactgctaaaagtaatca  
taatgaaatttttagtgcagttctctgatcattcttttttttaaatccacattgggtt  
gatttttcttgatcgatcatttcaacatcactaatatacaataaacagctgcaaaac**cg**  
**tggcag**actaataaaaaaagaaaggttaaagctggaaaatattgacaaagaggacaaa  
tcagaaaagactattgaataatttactctcccttatataaa**acaccag**agcgtggaagcc  
aaagagcaattttct**ccccca**acaaaagataaacctctctctctctatctatcttatg  
tcaaaagacagatttattaacaaacacaaatcataaatctttttcttcttccgagaaaga

### At2g29090

**tgcgccga****ca**ctttgtgtacaaatatctatatatgtaaagactcaaaagaaaagtaaaa  
tcaagttttgaaaggagaacatgtaaataacattcaaaaaaaaaaaaaaaaaacaagtagaa  
tgataagttctgaattatacttttaataacttctagaatctaggatatttctattttagt  
tatatatgcaattttcaagtttgtgtttatt**ggacca****agaa****ccgtcggc**aaatttttgt  
attacttatcaaaaatatattttatttttaattactataaaaataaatacaaaaactaag  
atagatatacgatctttattttttctttttgcatatattagctattcgt**tggcgca**aaa  
ttctaattaatatgtatataattaattacaataaataaataatgtttgaacaaaaaagaa

aaaaaaaaagaaagaaagaaaggccaggaatgaagtatctttccatctcaactatagctat  
ataaacccctcaatacttcaagcaaaagtcactaacaagaacaaacacacacaact  
cataactataactatacattcatacatataacaataattcacttaaactcactcggataa

**At4g33150**

cttgtcacatcatacattataacaagaatattatattatattaatttaactctttcgcta  
acacgcccacaatatattaatcatatacgtaatntagcttataaaaaggacggaaagaga  
ttattactgcgctaaaaaactcactaattccaagaaaaaaaaaacttgtatTTTTTc  
ttgacaaaccagctcacaggcattgcatgatcaaactcatcaggtacgTTTTtgattcctt  
cttcataatTTTTcccatcttgaggaatgcaaatttgagagcgcttagctaaactcact  
gccttcattTTTTcactttggatttaataattgCGTtctctctctctctgctctgt  
tctgttctgttctgttctgatttgagtttcaattaatcgctcgagcaaaagctatTTTc  
ca**ACTCGT**Aaatttctgttcccagtttgttcgattttcaacagtttcacattaaagttt  
gggtttttgatggttggtgatgaaactcgaaatgaaatggttgatgaatctattccag  
gggttttaaaataagggttggtggtcatctgcagagatttatggtttttacatgaaaga

**At1g60190**

aatcgcatgatttatctaagttggtctttattaactcttaacaaaaaaaaataatataagaa  
aacagagtcagaatttaaaaaccacttaattagtccttcaagaacaattatcaaaacctt  
aataatgTTTTcatccaataacatcctcgaagtcctccttaaatcattggatccaacgaa  
attcatgTTTTatctaaactaactcgaataaagaaacgattataataattgcacactatga  
aaaatatcagaag**cgtc**atagaaatt**gtcggc**tacctccatgcacggaaccttcacgaaa  
cag**ttggtcc**ctcacacacttcatcgccacgctat**AcCACGT**gtcaattttacatacacc  
aaaacatatctactaatcatacctct**TcACGTGT**aacaaagtcccattcaacgtggcaat  
tacagacccccaaaattatgaaactaatcaaacctct**TcACGTGTcgca**aacttgtagaacg  
ttgaaac**ccccca**ctcacacgaagtgtatatactctcttcacaacacaaacataaacatt  
acttcaaacaaagacttgaaagaactatctttgTTTTcactcatatcttatctttattaa

**At4g15260**

taattgTTTTctatcatcataagcttataagtggaaaaacatcaaccaacaaaaaaaaaac  
aataacagagaaatttgtcttcaaaccaatcaaaagataagattttgggtgaaaggggaa  
ttaatactcagacagccaagggtaatcttcaacttctgggagaagaatcccagatctga  
aactctagtcacaataactcttgtatcatcaccatattcaacccttccacatcccataa  
aactaagacatcacaaatctctttcacaacaaaccttaaatatcaccaatttcaacatata  
tacacaaacgaaaatagtcacagacctaaccctaaaatcacctaacatattcattcagaca  
tgaaaagaaagagagttcctatgatttgcatttagacgaaaccttataaatacacagacac  
agcagacaattagggtttactt**cggtcggcgg**gctaccatattctatttttaggttct**tcggcc**  
**ca**attataactaaatgggcccagctttcgtgacccaacaaacaacttacatttattttactt  
tattaacacattcactttacaaacccaatcaacgaaaagtccaaaaacgtaaaaaacagaa
