# Supplementary material
Source: PubMed Central journal article supplement (PMC1203392)
Supplement: plntphys_pp.104.058412_6.pdf [file plntphys_pp.104.058412_6.pdf]

## Motif map of cold long-term up-regulated (ColdUp) class

Significant motifs from ColdUp genes were mapped on their promoters (600 bp 5' upstream from putative ATG).

### Legend:

p<10<sup>-5</sup>    **acgt**  
p<10<sup>-6</sup>    **acgt**  
p<10<sup>-7</sup>    **ACGT**  
p<10<sup>-9</sup>    **ACGT**

### At1g01470

tgggcttatggcctgtggccatttaagtttgaccttaatatccatcagaaaccataacc  
aataccgggtcataagtgcattgtccatatagtgtaccgcaatgcatgggagtactactac  
attcca**CCGACgT**gcataat**gggggg**acatg**GTcGGtCC**attaatcccttgcgcacattat  
tccttacgcgaataacttttccctcttttagttttgtataataactttccatttttttggt  
ttaaatttat**cggtgtgac**tatctaaaaaggtatttaattatctagtttagctataactgc  
aaac**aaaat**atctattttcatgaat**gat**atattttgaaataaaatattggtgtcatgta  
acgaaaaaatcaaaaatcaagcagaagac**cgtaaac**ccacgctttcactctcactcgt  
ggaaaaccct**tcacacgta**cacaaaccattataaaatttaattccatttac**atcgACCGACT**  
**T**cataagaacatcgtaatcccatccgtttatatatatattccaagttaaacttcatatca  
tacacacaaacctaaaacaccgaaacaaaaacaagagatttaacaagaagagttatta

### At1g08890

tgagtgggctttagggttttgctcttctctatatgtataggctactaagattgattgtga  
tttgtagacttttagatcacacggattgca**aacgtgg**cagatcatctaccctttcaatta  
ttatgtgatctatggttcgtacatctccttttactttttgaaaataatgtacaaacgaaa  
agtgatttttagtgaaatagtcctccattattaagctttctataatttttagaccctgaatc  
ttgatctgtttacaagttcatatttttaatttacatcaatacattttattgtggattgatca  
tcccaatgtattgatggttattttaaagatggccagggttgatcgattcggtttcatatg  
attttagttctatgatgtaacctttattgatcaagcaacaagaataaatcaataatttat  
acgatag**CCGACaTa**aagagatttctattatcttactatataatagtcacaataatctat  
aacagttgttccatgggacacgaccaatgagtcactgccaatacaagcttcaagagtg  
aagactattaaagaacagagaaaatacagggaaaagcaattaggagaaggaacaaaagaag

### At1g09350

actataacattttggcttttgccagttaacaaaaagaaaaagaaaaaaaagtttagaa  
atattaaaattatgacgttaggacaaaagaag**aaaatat**caaatttatagaaaacaacca  
ctacataaat**AGTAGGTCGGccatgggtcggg**caaaaatagattacttaacaattaacgag  
cagcaaattagctttgggtatagtaacaaccaatcaatgttccctcagcttcttctcgt  
gggctccatttagg**ccacgtgg**cattatcacagccttgattgaattcaacggagatcct  
tcaaccaatcacgagatttcgtagcgtg**GTaGGgCC**ctctctcgttaaacacatgggg  
tagtatctaaag**tggaact**gtcacactgcatcgccatgtcatcattttcgggcatcttcaa  
cttaatacgaacttacgaagctttccc**cggtgga**taattaaccgttttattaattagcca  
taatcacggcctcaaagcctatataagttgtttctaccaacaatcaaatcacttatcaa  
caactcaaaactgatcatcacaagaagagagtttctctgataatctttctcggacaag

### At1g10550

taaatttaagtaatcaagcaaataacttaatttaattatatacaaatcaagcataactactg  
cattctaataccaatgaaaggggaaacagaattgccacatgcaaagtctcgaaatgtct  
taaacctgaaagaaaatgtgtgtagtcttacatgtgctgctgcaacattaatttaatgt  
tttctttttgtcattatgatcctataataagaatttttctgaaatgtgatttgattctga  
acgccaatgggtgattatgataattcgaaaatttagaaacaaactaatcacttggggaatc  
ttgaacggagccaacgtcagtcacatgaattccttttttaacattttaaatagattaaga  
catttatttacgaacattcttttagtaaacagacaaaataaatccatgatgggtggactct  
tttctaacgaagatcaatcagagcagaggtaaagagccagcttgtctacaactcattttg  
taaagtacctaatttaccctcccaacctgtcccaccaacctctacctctatatataca  
ccactgacacataatttaataatacacacactaatcagtaatcagaagtataaaacacaaca

### At1g13260

aaaatgatgtcaatactctcacgtggaccctttatccattccatggcccacacatgGGtCC  
cACttccccatgcacacagcccacaacataattcattttctataattgttctatactctct  
tttctctttttcttacataaataaaataacttattataaggattattattgtcttctg  
gtgttttcttctataagttacatcaacagttcatgaaatagaccctaataatagtaacct  
aattaaatgccgtatatttcattatgtttccacgaagcttcctttgtgttctttgagttg  
accatacacacccatcttacttcccacatgcacctgcacataactataattactcccctc  
aaacacgcattcttacaataatattttttgttattaccaataaaaagtgaacataaaa  
taataatatacagaagtgcacttgcgtgtttcttattttccctcccccaagctctttctcc  
ttctttctatataattatacacacacacgtatatacacacaacataattcacaacac  
aacacaaacacatttctgtttttctccattgtttcaaaccataaaaaaaaaaacacagattaa

### At1g14170

at ttataatttaataatagacgttagccccaaaaactttgtat tttctctgctttcaaacc  
caagaagccaaaataaaaccattgaagctagcagcagccgaagaagcggtcacattttcc  
ggcaaacagacagatcgaccagtgaagctcctatctgtaagcattgcatgttccaag  
ctctaattcaatgaaatggtgtagattcaacaagtcagtaaaatgtttccttaataAAGT  
CGGTgatgtctcatggatcttgatcgggtgtgtttgtgtagttttcttctcaattttg  
cataaagagctagaattgaggggagagatttgacctaatccctgtttcttgaataatctt  
gtttcttgatttagcatagttgaccaaacaagtc aaaggtgtttatgtctgaaaatttg  
ctctttgattttaactaatgtagtgccaagatctgatctttagaattctcaaggactctg  
ttttgtgtgtttcttttagtgtttgttgattatataaaaggatcatatgaacaaactaag  
ctctaaattatttttcatattttctccagcttccctgaggcattgtgatctcttgtaaaa

### At1g20440

tgacacaacatcaaattcaaattccaaacaactacataacatataatgccaagtccattga  
aactctttaaattatacatctgttatccttttaaatctgataaaatgcaatacaataata  
gattaaaggatgtacttcaAcCACGTaacatagaccattgattaatccaaaacaaaac  
catagaccatagttcgatacagcttctgttgataaaagtacatgactatgcgattatcta  
atattagtttaactcttcatctatataatataaaacataatcgtttaaatgaagaaaaa  
gtgggtgatactgatatacagatattcactACCGACTTcaagaaataagaggggtcatta  
tacaattcaagaaataaataatccatctttttggatcattttaaaataatataatcttta  
cagcgttaacCTCCGCTtggcctggacccttctcttgacactataaaaaccccactctct  
cttatctcatcacaacattactcattcacaacacatcttaagcaactacacaagtct  
tgaaat tttctcatattttctatttactatataaacttttaatacaatcaagattaacta

### At1g20450

gtttatatttcaacatatagtatgcaaacttaaatcgtgagaatgacacaaccactaatt  
caaaccactacattatataattcctaattcattcaattcattaattatacattatataatca  
tatctatataatgttataatatacaatcaaacaataaattagaaggaagtaccatgcaac  
caaacttccatacgtctcccgtgaactaaaagtaactactatgcaaatatctaataataa  
gttaactctatatcaatatattaaaaacataaatccttaaattaagaaaaaatatggggg  
gatttcattgatattccaccaccgaccgaCCGACgTaaagaaaatgggttcactctgca  
acttaagaaatagtaaacgtcctttgccataatttaaaaaactaatgaaatctttaacag  
cgtgtgacCTCCGCGTggcctggaccctctacttcacacactataaagtcccactcatc  
acaacaatattcatcacacagctcttgaaaaccatcttaaagcaactcaaagctcaaatc  
gaaatttctagtttctctttatcattcacgctaagtgttcaatcgaatcaagattaagta

### At1g22770

agaagcctccaaatctcttttttctctctctctctcctaaggccaccacaatctcttctt  
ctgtgatgtattcttttttctccgatattcgtcgcgatctctcaaaaatctctcaaagc  
caaaaaaagcaagagtagagataaccaaccaacaaactcataggaagacataatttactt  
tcaggtctttcttctactaccttttctgtggtttttggttgattgattctcagatgagat  
ttttcccgaatcatttgatgtcttttttttaataaagtcttggtaaatcactggtt  
ctactagcatttttctcagcttagattgttggttgatttgacatcttatctga  
ttgagattttgttcttctgaattggtgttacagggtttagctgtttgattcagcttcgat  
ttagtgtacagtgtgttgattagataaaaaggatttaaagaatctgggagatgtgtat  
agtgattgttcttgctggcgaatgttaacactacgtcgtattgattctcagattgatagta  
gaagaaaggtggttagtttagattggtcgttcatctagttgggggttagtttccggttctg

### At1g46768

ttttaaccatcattaacatctctacttgaatcaaatttaaccgagaagtactggaccaa  
aaccaaaccacttgattaataggagagcatctaactcaagataacattttgtattagttt  
atgtggctctgtgataccaacattcaagtctctgtcataccaaaacacgggtatttgtct  
taataagcaacttaggaataatataatgaacaatcatcatctatgaaaataaaatattta  
tcaagagtttgaattattgaatcaaataatttacaagggttgatcattttctaaaagttct  
tgatttgtatataaactgagtttctgtgattggttttataatttttgtaagccatctgat  
ctcgatgaatcttcagattcaattcAGTcGGTctcctaaccatccatgacaaattcag  
tgataatatagtaaatagataacaagtgtgacgtacgaggttacttggctatttctacaa  
aaccaatatttAtGTCGGccaatagttctatattaatattgtcaccatacttaataaact  
tccattgcccccaaaagtttgtcttttatcaatggaaagagaacaagaagagtctacga

### At1g52100

cttaattaagattattatataagtctcGTtGGaCCacggatgatataaattcaaaaacctt  
atccagacagtaagaacattaaaactttatataatattgggtctctcgtggatcacgattc  
atatttaaaaaatcatttctaacaatgaaactgtgtataaaaaggcaccttccactagta  
ctgcacatcactcagcattgttcttcagctctccttatcgcctctctaaaatccactataa  
gaggttctatcttcttataatttgaaagatataagcatcgaaacactttgaaatgtaaaa  
atatatacatattataatagttatgcagtaacttaaatatgcttagttaattagtttgatt  
aaaatatgtagcttagtggttaataatatttagattgggttaccacttagcttagat  
tcaagctttcaacactacgtcaaccacgtaataatattggttgaacaaaaaacttagttt  
tcttcaagaagtgagtggttcttactcttgctttaatttgtgtatgcaaatgattttg

cgttttttccttaagtaataaaaaatgaatttatatatggcagattcgtaaccgtaagtga

**At1g54000**

agtgttaccatttacaccctataatcccgatgaaatttgatgtttaattctacttcttgc  
ctctaaatgcacgatcttttcagcacttcgaagaggtaaaagtgacttttaccgatgag  
aagggaaatgtgtggcagatagaattgctagggaaatctctttcttttctgaattatgatc  
caaattgtattctatattgcccggattgggttaaagcttatgtgtattcagactcttg  
taattgtaagttgtt**gtgaacc**aaaaaaaaaaaaagcagatctttcttggtactcgtag  
taacaata**gatatt**ttgttgagaattaaaaataaagtagaagagaaaccagtaatgc**gtc**  
**agACGTGAT**taagcgaactatataatataatgatcgataatcgtttgctagtgcgtaa  
ataggtgtatagtaaaatgaacctcgcgctacacgttattatttgatagtaaaatgaac  
tattttttcattgcaaattgtagtacttgcaatataaatataacgaatcggctctacga  
gctaaggcacaagcaatcttcttcttttcacagttctgtttctcctctctctaaa

**At1g60190**

aatcgcgatgatttatcta**AGTGGT**ctttattaactcttaacaaaaaataatataagaa  
aacagagtcagaatttaaaaaccacttaattagtccttcaagaacaattatcaaaacctt  
aataatgttttcatccaataacatcctcgaagtcctcctctaaatcattggatccaacgaa  
attcatgtttatctaaactaactcgaataaagaaacgattataataatgcacactatga  
**aaaatatac**agaagcgtcatagaaattgctcggctacctccatgcacggaaccttcacgaa  
**cAGTGGTCC**ctcacacacttcatcgccacgctat**AcCACGT**gtcaattttacatacacc  
aa**acatatc**tactaatcatacctcttca**cggt****taac**aaagtccatt**caacgtgg**caat  
tacagaccccaaaattatgaaactaatcaaacctcttcacgtgtcgaaacttgtagaacg  
ttgaaa**cccccc**actcacacgaagtgtatatactctcttcacaacacaaacataaacatt  
acttcaacaaagacttgaaagaactatctttgttttactcatatcttatctttattaa

**At1g60470**

tttgtctt**gatatt**ttttaatt**ctaccg**ttttgttttcttcttaactattaatcttctt  
ctacattttgttattgtcaaccaaatcgggtccataatcgaaatctacggaacatata  
cacaaaagaaaaataaattgtgaacatgaattcaagttatactatcagttttaaaagt  
ttaaattcatgaaactataaataaaaaataaatctttgcaatcttctctagatacatcaag  
aacttctctaaagctatatttgacttttctattctggttagttacatcacccatggaaaaa  
gccaaaggtttaattttcatatctgaaaagtaaaacttatataaaaatgcaattaatag  
aaga**acaatatac**gaaaaaagaaaagttattcataattaatttgttccggatttacc**CTtC**  
**GCG**ctacgcctattta**tcaaacgt**tggtgtagccttcgtagaaactactcacaagccaa  
agaccaaagtaactaaaaagtttacaagtcacaaactgttcttttacttctcaaacac  
tcaagaaaacttttcagttatcttctataacctaccccaataactttttctttgctcaaaa

**At1g62570**

agtttctgttaggaatctgggttctattctcctctgcaacctccagtcctctcatgaatctg  
gttcggattctcttttcttcttatataatttagatacatggttttataattctat  
catatgtctatttt**gatata**gtatttttaaaaatatataatctttcataaatggttatg  
gtctattctatgttaatgataatcatttagtctttttgtcaactatgtttttttccaac  
aaatttagtatgtaaactttttttta**ctaccg**ttttatataaatcga**cggt****gat**cagatc  
aactccggtataacacacataagtttcggtatcaaaacaaaaacaaaaacagatttttt  
tttgtcaactaccagtgaaagattag**ctaacgt**gtcaagaaaccggataaaaaatatataa  
cgtattttgggcaatcagctaagatattaacta**ACGCGGAGt**cattatataaatggagta

atgatgttttcagttttctatataa**AtCACGT**cgagaccgtagagtcttacacaacaatc  
cttcttacatttt**ctaccaac**aaaaacacaaaacacaaacatagcattcaaaactttgaaaa

### At1g62710

gaagaccggttcaattccggtttactattttctaattaaactgggttaatagtctaattt  
caaaattattttagagctctgggttaattaattagtgcggttgtaacggtgaa**ataatat**  
**cggttGTGGTCC**attaagtgtac**ACGTGT**cggactataatttgcacgttctctgttgt  
gt**CGCGaAG**cagaccaattcgttgattttatgagatcagcagagtaaatattccaaaatat  
tcaatcgtcgacatcacaaccatttttaattcgtattttttatattttaatgtaatat  
aacttagttttagaggaa**acatatc**aaaattaaataatt**AaCACGT**taaaattacatcgg  
tataatagtataggagtttataaaattaaatttatcataaaagcatatgctaacttta  
ttaagtgcctttcttttaataatcaggtggcattaaatataattagacaattgatttgg  
tgattatattttggtgacaaataattattaacaccattgtctaaccatcctttgctttt  
atagttctctttattctctcaaaaagcctctctttctctctcttttgtttctcgctgcca

### At2g02120

tattggagactaattattcatagtagttaccattta**AaCACGT**aatgttttcatttagat  
acgataaaaaaagttaacaaaactctagtgtccttgactacacttttcttacttttg**ACG**  
**TGgT**cactattattgtggactcccaatatctgactaactcaaattttacctttct**tc**at  
**acgt**ttttttatctgtttgtaattaattccagaatgagttgtcaaaccagtaggattt  
ctctgcatgt**cggtgtcac**ttgcattttaaggacagattaacggttatgactagg**gtcggt**  
aaagcaataaatcgacaaaattagaaaacaaagaaaatgtggaaaaagcagtcaaaaga  
agaaaaatggtgacaaatggttacgaattgggttaaatacaaaagtgaattatccgagaaa  
gatgatatttacc**cccaaaatatc**taaaacaaatacttaaaaatgcaattctctaatagac  
tatcaaatatcccgatacctctttatataagtgccatcttcatccttagtaatgtacacac  
acacacataacacttatttccaactctgtctctctcaattttctttctctttctccaac

### At2g05380

accgatattg**atat**ttt**ca**aaactatctcgtcaatagtagttacaaaatatattcactta  
tacagaagtggaaatatacatatataatctcaaaactaaaacaaatacaaatagaaacttgt  
atatagttttagcagtgaaagtaattacgtttctttttctaataatattggat**atatatt**  
cccataaataattctcaatctcgtaatcttgggtcttagcgatcttaattcatttt**cggtt**  
**gat**ctctcaacagttttaaatctagaa**AGTGGT**ttgaaccatgggtcaattattaggact  
tgctaagtcaaaagactcgtgaagaaaagacacttaagtcaaaacatgaat**cggtgtact**  
cgtatatacaacaatctccattatttatgggttgcaaaaattttatatgtatcttata  
**ctaacgt**tttaacttatttaaaaagaatttacagatctgaaatttaatagaaatttatt  
ttaaatagatattaagtagtgcacaattgcaagagctaa**agtatatc**ttt**gatatactg**  
tggtgttttgacagggcaggtgaagtcagagagtgaggaaactgtgaaacctgaacaac

### At2g14610

actaagaaacaaataattcttgactttttttcttttatttgaaaattgactgtagatata  
aacttttatttttctgactgtaaatataatcttaattgccaaactgtccgatacagattt  
ttctgtattatttacagg**agatatct**tcaaaacattttgaaatgaagtaatatatgaaat  
tcaaatgtgaaatagaagacttaaattagaatcatgaagaaaaaaaaaacacaaaacaac  
tgaatgacatgaaacaactatatacaatgtttcttaataaacttcatttagggatatactt  
acatatataactaaaa**aatatatc**acaatggcaa**agctaccg**atacgaacaatattag  
gaaaaatggtgtgtaaggacaagattgacaaaaaatagttacgaaaacaacttctattca

tttgacaattgcaatgaatattactaaaatactcacacatggaccatgtatttacaaa  
acgtgagatctatagttaacaaaaaaaaaagaaaaaatagttttcaaatctctatata  
agcgatgtttacgaacccccaaaatcataacacaacaataaccattatcaacttagaaaa

### At2g15970

tatagaatgaaaacttcaacgaatccatacaacttattggctaaatataataaatctgct  
tgaagcatattgttattatttagttggatttgacgatctctgactttaatgtataACCGAC  
aTaccctatgatttagatgttgatttttcccattcttaatatatccatgttaagagattc  
caccataacatatcctaattatttgcattgtaataatattatcattaaaaaaaaaatacaa  
ctggacagctggctcgtcccattgtttccttaccgtccaccaattacatttgttaaagcaaa  
cttattagaacgttcatgtgtgagaAGTGGTgtcgacatgtgtcctaaggtctatgtcag  
aaatcggattagcttattaagtaaactatactatatcattgttaatatagataaaatatc  
tagttcgtccaaattaaactattttcataactgCCACGTGGCGtaaacgtatccatcgag  
tcacttgaatatctttataaccaagtcttccaacacattcatcaccatctatctactc  
tttactctcttctcttctcacatcaattattcatagttctctcttctcggcaagaaaag

### At2g16890

ttaccctatatgtatacgtaatattaaacttttattaccctagtgtaatgggtttttgct  
atcatcatcgatgtgtctccactctctacctaattcaactcgataactaagtTCGTACG  
taactagaatcagttgaacttacatatacagataaagtattatcagatgacactgttct  
ttcttaataattaatgttatgacaactccactcaaccaatataacttgtaacttaatatgaa  
ttttatgtatattttttttttctgtttaacattaaagatgacactattcgtttccgaat  
ttatcctgtctttagctgattaatgtttgacacatacttgataattagaaataatgg  
tcctcagtttggttttcaaactcgagtttagcttaacttggtgctgatgaaaataaact  
gtacacgtatgtattaaaatatttatttaaagcACCAACTaaaatggtatgctatttgat  
aatatc caaataattaaatcaatatcacgattcacttcctatatatatagggcttgcgga  
ccgaacacatatcgtgagaactaagaaacaccaagaaaacaaacaaactttttaaaaa

### At2g23120

atatcttcacaattaattataaatgcccgtcctctgattttctaccaattaagaaga  
atcactaaattaacatgttctagctcaaaaaaaaaaacatgtaatagctcaaggatg  
ttctaaatgaaaaggctcaataaaaccaataatgaatcatcaciaaagctatgtcaacg  
aagacaaaatgcaagtgtggatatttttcagaaactgctgtaaaacaccgtgaaaatcatc  
ttcttcttttttttttttttggtcaaactctctacagagtttatcaagtgattttaccg  
gtacctgttttcttgtttgggtcaactcaattattcgccttaaACCACTttaagaaa  
agcccactgaaaagcctactttaaaattcaaccaaaggccataagtaactacagCCGAC  
aTcagcagacaacaagccacgtcgtatctcgaggaaccgctgaattaacgtgtcggaatca  
cacgagccaccgtgtactagatagctccataaaagcagacacatctcatgaagcagaacc  
taaacctttaatagcaaacgaaaaataaaaaagaagaactaacaaaacaaaaaaaaa

### At2g28550

atgggttaaaaaaacaataactgcagcgatcattactcttgttttggtcgggaactaaaag  
ttgatgtttcatttcatgtattgtattgtctcctttgaaaaccaaagcattgaccaaag  
cagtacgtaccggcaaaaaaaaaaaaaaaaaaacggaaacttacttagccggtatacc  
actgccaaaaaaGGACCAACAacaatatgttaaaattttattataaagttattatacaca  
tttatagttacagagagagaaaaacaactttattataaataatgatcatcctctaaaatt  
gggtctgaaatgttcccTcacacgtctccttctatcttcttctccactttaaaaaaaa

aatatccgctctcactctctcgccgcggaacatttccggcgacaaaacttctctactc  
tcaccattcctccatcgtaatctctaaattcttctccattctcttcttctcctccgatcat  
ctcgagctcttcgtagagattatgtgattatgtaatcgttggtgctgtagaagacgatc  
tctaacaactgattccttcatcatcaccttcgctagatttgtaattttcagagcttgaga

#### At2g31360

atattgtaaaataaataaatgtattgtattaacattaggAGTGGTgtatattgacactt  
gggtccttagtttgatataatattgtccataaattattgataagataggactaaaaaca  
gtatatgcttgggtacaagccAGTGGTaatccaatttttatttttaaagaaacagaaa  
aaaaactctggaattttgataacagttttccagctaccggaACGTGATttttgcctgtaA  
tCACGTacatccataaagcatgtatatcaaacagtagaataagtcaaaactaaatttcg  
agcctgtgacacttttctctcttacgctggcatctatatttaaccttcttcttttttt  
ttactggttacacaaaatatactttcactattgcatgtagtagatcacctcaaccctta  
cgtgcccatccgcaacaacaatatcatgatatttattatttactgattccttatgatac  
tttgttgtagtaaatataaatcactataaattagaagagaagcatcacttttattcttct  
ccattaacaaaaagagagagagaacctaaaaagaagagaagagaaagagagatccgaaa

#### At2g39710

tttgatttaatatatagaacttttacacgatatctctcttacgattaatctaagtga  
gatgattagaaaattaaaaagtaaatctgcctaaaacagaaagaaaactaaaaaaatg  
taagggatcccggagaaagtgggaacacaaagaaagtagaaaacaaagttgatgtgaact  
acagagactaaacagaaaccacaaagacaaggccaaaagACCTACTcctccactcacac  
tcacttgtcttttgggttttgtctcgagacttggctcctccaaaccttaaaaaaattca  
aatgaattcgacaacaccaaacccttaataatcttcatgaaatgatatttgttaggtcga  
gacaaaattatgttttgaatagtataagttatagtttcttaagtggttaatttgggtcaat  
gacttgacttgctactagaattattgcttagacgttaactcaagttttgtcacctaaaa  
ttcaaagtaaacgggaacaaaccgggcaattcgtaatataagaaatatagagagaaaaaa  
gatagacaatatttaaagacgtcaagtatgtatgtaacaaagagtctacactactaatga

#### At2g42530

gtgagtttttgttttgtttatattaacattggagatttaggttcttaga aatatatctat  
atactattagtagtttaactacagtttgacttaattgaaaaatgttaaaagttgtttt  
aacctagctaattgctaaaaatgactaaatagacatacacaagacttgtaacattttcag  
cttaacgactaatacatttttctttatataatctctatcgagtctagttatataatg  
ttgaaagttgcaaataaaacagaaatgctaacaatgtaaatatcgtagccaaaaatgctaa  
catgtgtataacggttataaccacaacttgaaggCCGACCTcttttttcttttggtaacc  
atagaaatggttacagtaacttagtacgaaccaacgaaaactcttcttattcgatagtt  
aagataatagcaatgacgcaaaaatatctagcactcacacggttagttttggattctcatt  
ggtcgagagatctataaaacgatactattggaggttagatttttctcatctcactttctc  
catcttaaaactcttcttgtatttttctcccaaaaacatctttaagagtcctca

#### At2g43060

aggtgtaaaattatacttttccgaaatacatgggttatacaattcacattttcattttaaaa  
ttctaacacataatgatatacttacacacatctaagtagccaccagtaagcaatcgatgtca  
aaccactaaaccataacagacgaatctacaaaaaatttgaactaatattagtaaaccccc  
aaagttaaacatagaactgtatttttggctgttcaccattgaagaaaactgccacttat  
aacttcatattctcatatttttacgcaacgtaactttgacggaccaattaagctccaaaa

ttcaatatttcaaagctattaacacatcttttttttttagaacatgagttataaatagt  
tgaaccctatagtttaaatttaaactttatagagaatttgaatagttgtgtgtcctgtgac  
ataaaaaaacataaagaaaagttaagtacaaggaaaaataaacattatttattcctctct  
atctctctctctctccacctttccatttatattaaccctaataattgtgtcattctcaa  
aaaaaaaaaagttttataaaggttctcaactcaagttctcttctcttaaaaaacccaaca

### At2g46790

tagagcagctgaaaaaaaaaatctaccttttagaatttattaaatccaacccaaaatca  
aacttagccacacaattacaatagaaaccacgtgtcatccacatgaccactagatattc  
agacgaatatctccacttccgtagagcgattaggttaatgacACGTGtTaaggtggacct  
gcgaagcagaggaccactccaccgaatcagccgcgatacagagaaaatcaaaacaatgg  
ctcatattaagccacgtcagctcagtgaggccgtttgttacacaccgttaattagat  
ttctcaaattgtttatttgtctctgagcttatacaacaaagtcttcttcttctctgagaa  
gatatttcgtggttgtgatcgaagatacctaaactaaagagtttaacttcttcttctct  
tcttcttacttcaacatctgatatctctctctcttattcagctctgaaacaatat  
ttctcggtagatataagatctaaagctcgttgatctagattcttgtttctatttttgtgtg  
tttaggcttgggttttaccagtggttgatcagtttgggttgaggctgagctct

### At2g47180

tagaaaagtaacaagaattgaaatctcgacttttaaagtggttctctttagtggttat  
ggaaaatgagatctttagtagatagagattactccttctgataattcttcaatacagtggt  
atctacactgtttcttcccgtatggtttcagtatcttgttaaatacattagcaaatga  
ctttaataaattagcaaaaataagtatgacttagaaaaaaaagggtgtgtattaaactaa  
aatgcaagaagaggactagggagtgacaatgCaCCtCGTAgcaggggaataacatggt  
ctgatttcccacaaaacaccgtagctagctagctgcttctagcgttttctcgtataacc  
gtttgggttaaatttctccggtacGGtCCcACtttccagaacttccacggtttcaccaa  
cgccaatcaccaccgtctgttctctacttacacgtgtacgtatcagatttccagatcgt  
aacccatccaagcgcctatattaaccctgtttatcccgtaccgtaagtcctcatcagca  
aacacaaacacacgactagataaactctaaatcctcacagcagAtCACGTGcTaatcaca

### At3g47500

ccatgggtacatccaacaattatcctctattacagtttttaatgaagagaaaaatagtag  
agatgatttataaagcaaaaaaatcagtacattaataaccaatataatagttgcttca  
tttttaaacgccaattataaaaaacaaataaacaattttcacaataaaaattaacttct  
tttctgataggaaactaaaaaaactgatacttttaagtttatgattaatattatata  
tatatatatatagttttgaatgatcgaataaataatgtgcgacagaaaaataaaggaca  
aaaaaaaaaggattagatgccaataatacacataaaaaggtaggaaatattaatgattaat  
taataaaaccgacaaccgacccggtattaatgagcgaaggaaaatagaggcca  
cataaacttgtggctgagaattgaattgtgatgctgACGTGtTtctccttctcttttaa  
actgatcttctaaatccctaaatttaccattcacactctcccaaatctctcttctttaa  
acaacaaaaaaaaaatcacagagacatagagagaagaagaacagaggctcaaaaaaa

### At3g50970

atcttttaacacccaaaatctgaaacaacagcatgaaaaagcattaggattcagagata  
aatgagagctaaagcttcaaatcatacctttttcaattccttctctgatgcgaagaagaa  
aaataaaaaaacacagcttgagaaatcgaatcaaagcttttttcttcttcttactaaca  
atttcaaaaaatcaaagatgaacaacaaagggtggaagaacataccaaacgacatcgtt



ttttagtttagtaaaagatatgcattattgggcctttcatatctaaaggcccaaggccc  
atataagttaaaat**TAcGTCGGTcgct**aaccactactaca**CCGACgTctta**cttgccatg  
tgtgtgtgactcttaatacaattacgaattgaatatattacttttacg**AtGTCGGccAaCA**  
**CGT**attgagtaaa**atatc**atgtgatgatgaattcctatccaaaatgaaatttgcattc  
tataaaagtatcattcaagagatcattaatcttcatcgatcaaagtcttgaatatttcat  
ctatatatacctaagaaagaaaagagttaaagaagtatattttcgattcaaagaagaaa

#### At3g51240

ttgtctgcttaagattttttttttgtgaataaggtttaattatctcatcaatacgattta  
gtaaaaagtctgtgcaaaaattaatgacgattgggatttttgaacgcaagcccgtagca  
gaacatgtctc**CgCCACGTGaT**ttctccacagaccacaagcatttttaagacgtggcttt  
ct**atcaaccg**ttaaaaacgtaaatcatattaacctatgtgtct**ctacc**acgggtgtaaac  
gaaactgtataacgtccctatcatataatagtaat**gtgat**acgtt**gga**atgtagccaaaa  
agcataaaaaataaatagataattaagtttataatgttttctacaaaatattattatac  
cgtatgtattttttatttttctgaagttaaaaacagatgtagttagttgagtaaat  
tgtgttctagaaagagaagagagagca**gtagtacc**gt**gtagg**tagctagcgacctctc  
gttcgtcagtcatacaagctttgaaagattttcagctaccactctctcctttatata  
cattacacatctctctttctataatctctcttaatttagtcttttgtcttcgtaattaca

#### At3g55120

taagaaaagaaaagag**gat**at**gt**tgatattgagaatacccaaaaaactaggatttctgaata  
ttagaaactagaga**acgt**a**aga**aattctttgattttttctttgattttccgaaagtaaga  
attagagaatactttttctgaaaagctatttttttttttttaattttattgatcaatca  
actgaatactgaatacaaaaagaaaacctgatttatttataataaaaactcaattatttat  
aatataattcaaaaacctagataaaactctaaaataatcatataattatctcaaataacca  
aaatatataaaatcaataatataagataacgatagaaaatatttgaattatcctaac  
tatgtgctctgcataatttaagggctcaaagcttcaaccaccaattgtcaatgcattccc  
aatcaaaaataaaaaaagagacgaaaacgaaagtac**ACGTGcT**tacacatccaactc  
gtaatcgtaactatt**gtacc**ta**acc**cttctctcttctacttaaccccaaggcccaaaa  
acacaatcaagaaaagctctgtaacattattatcaatcgaaattcca**ACCgACT**caaaa

#### At3g61890

aagaaaagcaaaataatcgagttttttttttgtttcattataaactgcttcatttttct  
taggaa**cgccca**aactgttaaaaagtaaaatattgatggatgatttaattgatgtaaccaa  
gccagttcgccgtttgattgt**caacc**acggttatcattcacttgatcacttccatgaa  
catataaaagctgataatacttatattataaaaggaaaaaagtatgaaaatattatcagt  
agttagatgattagttcacatctaaatgaaata**cgact**taaaactgaaagagacatgagcc  
aattcgtgtcagagccacaaattttgacgtatatttttagcccg**gg**tc**cac**aatttt  
gcaggtctttttattcaatgagtttattttgtcttggttgaataatgaaatttccaaata  
taaaaaataatagaaatcc**gaGGcCtAC**acaagcacacatagtaactcccacattatat  
ataag**cgccca**aatatcagcaactcagagattccagaaagaaagaaaaaaagaaacaaat  
aattccaaaaccttctctcttaatacaaaatcaagaaacttacaagatctgggtgaaaacca

#### At4g01870

gagatgcttctttgatcagcgtggaggaagttgtgaagaaaatgaaacccatggaaagag  
ctgttttaggattcaaatacgaacagatcatcgatgcagggaggatga**AGTgGGT**taaga  
aacatggattaaattcaagctagtgaa**gt**at**atc**ccggcaagcatctcgccggaata

ctttactgatcgccgaaaacccaatccttctatttgcttgatggttgattcttggttggtt  
atttaacttgggttggtgaaaactagaagagatattacacatgggtgtatacgcagcga  
ttttgcttggttaagtccaaacttcattagctcattctctgtctttgggtcaaaccactgt  
ttagtattcaaaaccaatcttctcacattctattacacatacatgaatctcttctgctc  
gattttccacgtaattaacgataaaagatcctatgaagactgcaacgtcattacaca<sup>cg</sup>  
<sup>acgta</sup>cggatcagttttggtccggttcacacttcacactcagtcaaatagtcaaacacctc  
cacaaccttctataaatactcgaatcactta<sup>ccaccaaca</sup>aattcatcaaaaactcgacaa

#### At4g03400

tt<sup>GGtCCtAC</sup>atgcttatccagatatttgagagaaagaaacatcaaaagggttagccaca  
ttataggaagaactaaaatcttctaatgctattttgctcaaatagggtggttgagagctct  
gttcatttaataatgtccatatttggtggctatgttcactgaattattaacagggaaagca  
ggtgaaagatagctaacatgatgtaggggttttgggtttttaggaggcaagaggctttca  
tgggaccacactggatgatagttgcaaaatacattgtgggttaagggttgtctcttgagca  
catggtgagactgggatactcttctgtgagaacgcattaatagctgtattaagtgttgat  
agaatgtggacggtaattcccgtgacatttatggaggtatctgtgatgttttctctat  
taaaaagacaaaataaggagacccaaaaaagggtgagaacaactatacacacaaaagaaat  
cttttgtctgaagacaaagggtggtcaatgaccagactcccctatatggtgggttag  
gacttctactcattttgcatcgttgagatactatactgccttgaaagacttggatttga

#### At4g12470

taatttatgcattaaagaatcttaattaaattcataaacattacatatatattaatcata  
tattatatacatatcacaaatcttctgagtaagtttctaaatacttgggtgtgtctcca<sup>t</sup>  
<sup>ggcgg</sup>ggctcagcttgattataactacactaggaatttattatattactcgac<sup>ctgacgt</sup>  
<sup>a</sup>tagaagccgtcaagtaaaagagctacgaaccaagataaatctgaatatcttgtgcatcc  
acgaactcatgatgggtgtgataataacagcattgacaacttgacattaatacttatatg  
aatgcacgtatatataaaagtattttcttaatttttaaaatgggttacaaaaacaaaatcc  
aaataatttca<sup>aggtctac</sup>gtacctagctacatgcatataggaaaaatgggtcagaat  
atatatatatatatatatacaaaataattacaaatatctataaataaattttaaact  
aatca<sup>AGTGGTCC</sup>tcttcccatccttctaaaatcctataaataccaacatcttctct  
catatctatttattcaataacccttacaacaccgaatataactttgaaaaaaaaacaaa

#### At4g12480

attttttccgaggaagttcgagaattttggttagcatgtcttctctcttctgggaccagtt  
tgtgataaaacacatcctctcggaaaagagtgtagagcacaacttctctcgaatgtact  
aagaccactaga<sup>ctaacgta</sup>tagaagctctcaagtaaaatgggtacgatccaaagagaat  
ctgaaggatgtgcaatgaggtcatgaaccatcatgatgggtgggtgataaacagattaa  
cagcattgacaatttgaaaataatagtaatatgaacgcacaaatcatatttatttcttaa  
atagaaatgttttacaaaaacgattaatgtctaaattaattca<sup>aggtctac</sup>gaatctac  
ataaaggaaagtagaaagggtcagaatttgtatatgtagataagggtcaaaataaataaata  
aca<sup>gatatt</sup>ttgtagaattgcaaatatatgtgaataatcaaatataatagaaca<sup>AGTGG</sup>  
<sup>TCC</sup>tcttcacatccttctaaaaccctataagtagccacaccctctcttcatatatcttca  
tctctcactctctcaaagacactgaataaatccttaaaaacaaacttttgaaagaaaaaa

#### At4g14580

tatatatgcaataagtttaactaccatcttccaccattataccttatataaacatctgt  
caaaactcataaagttattaattaacgttatcactgaaagaaaaaagaactcatcatcg

ttgaaaccctttcaaaaaaaaaaaaaaatcatcatcattggttacttattattaatatta  
actttatgaaactcttaaagctattaattagtaagtattaactttaattaatagcttggt  
ttaacttcttaagttaagtgtctaccggtttgacagatttatagacacattcacatcaaaa  
atcaatttcagatgcaaatccaaaatacacaattatagttcttttttatcgtcaaACGTG  
aTatttaataaaaatctcaacgttgttttctttttcccaaaaattattaagtcacatga  
aatacgcactttttattcgaaggcaacgtaagggaatctcgaaaaacaaattaaagtg  
atttttctttctttatataaagaaaaaacagtcaccacaccataatctaaccgtccc  
tgaagccctctttaaaaaaatctccggtaccatctcgcgcgcaacaaccaccacaaa

#### At4g15910

gttatcatcattcagatctcaCCGACCTcttctgatctttgtaccaaagtatacttggt  
tattcgcagatctttgttagacttttcaccttttaactgocagtatcgttttagtggaag  
acgtacattgggttttacgtcttctatttctttcaattcaatcatcaaactatcaaagca  
tcaaactatcatagctttctcactagtcacttggtgggtttctcgaaaacaggcaaaaaca  
taaataaaacccccaaaaaaatgaattagccatttactatttcacatttcagttttta  
accttactttggcagtaagtatgagcAGTGGTCCacagtaaggcccatgagcccaatt  
tctctgtcgtgggtctatataagtgcgcctaaccctaaagctctctcgaaaaacca  
tcaccggggaatctgacggcggcttagtaccggcggctactgcaaaaaggatttggttct  
tcttaggcttgatacttgcttggaagaatataacaatcattttgcgtagctaaaacg  
ctaagctctatcgtcatatctttatcattgatacttatttgatatctaataatcataaaa

#### At4g17090

agaagccaaaattatcagcttatctccattaacaagggaaaagcaagactagatttaaga  
gttctctgtaactaaaaactgcaggagttagtaagtaataattcaccaacaggaaaaca  
aaactcaattatctatagctgaatacacatgtaaatgagaatttattaactaaacatct  
tcctttgtaactgatgtgacatttacaatttttcttttgagggtgaagaaccggtgac  
aagtgaaggttaaaaataagcaacctttgtgatatttctctccactttttgaaattgg  
gtctccaaaccacagccaatcaatattctttataatacaaacacacaaacagcatcttt  
ctctcaaacacaacatatcttctatcaaacaccaacagctctattctctacctcatttc  
tcatcatacaaaagagagagaaaaaactatggaattgacactgaattcctcgagttctc  
ttaaccaacgtaagatgccaagagttctagaaaccaagaaagttcctccaacaacatga  
cctttgcgagatgaagccgccaacatatcaattccaagcaagaactcggttaaggaaa

#### At4g17550

cagcaaacctctcagttactcggagaaaatggaggggaagacagtggaagagccttatct  
gcttttcgcttctattttggcacacgtagtccatcgcacggtggaattttctttatggg  
ccgtttggtattgtggccttttagtatatcaatattaataaataagatagtagtactatgat  
ttataaaaatatcaataaaagagtcggcctaatacagcagcttattatgattacataaac  
ctataatttGGGCCACCACCGTCGGTcgtgtggccgctcgttcatgcgtaccaaaag  
tggtcaccggtggcatgacaactggtgttctgccttttggtctaccgtaacaaataggac  
acgtgtcgcgtcttcacagtttatgtcgtgttctatctctctctgtctctctctctcc  
cgccaatatctctctccctttggctctctctctctaatcgtctctctcaatcaaattaa  
ttcgtgattctgatttatcaaacactaaaacaaatggatttggttattcattttgatcc  
gtaaggttgattctttttttttttgttatcattgaaaatttggtttgtgtgagaga

#### At4g19810

accataacttgaagatgtgattcttcaaaaactaaatagtatcaaaattggttgaagaaa

aatatattatcaaaattggtaaaaacatattaaaaaatggcagtactctgtagacaga  
gactctccacaaccattattaaccc**AaCACGT**cacatgcatggaacttggcagcaaccat  
acactttcactaatgagtcattaccgctattagtagccattggtttcttgtagacaaga  
aatcatataatatacgattaaaattgaaataaaacaaaatctttcgtgaagcaatt**ggata**  
**ttc**tatagga**tacgtgag**ctgaatattcaactttgatataaatgaagttgaatatgtgtc  
tcttggtccttgctttcgcattcatattacacacttgtgtggtgacaaaataaaatgcaa  
aatTTTgccccaaactaagactTTTTtctcgttttagcaaaaaacaaaactaagactTTTTct  
ctttcgtaa**gatatta**tTcatagattttctcattttcaaagttgaat**tacgt**aa**gaa**agta  
aatatactTTTTcaataaatagacaacaaacccatctctgTTTTtcacagcaactcgaaaa

#### At4g22470

ccaagagattagagctggaaaaaatatgaggctctttgttcattggtttaaataacggat  
catattattagaacgcgcgaaaaattggtactcgtaatgctttg**gtta****acacg**gtaaaact  
cgaaatgagttaaatgctTTTTTTTTTTTT**ttg****gtc****gga****cg**aaatgagtgtaaataaTTaa  
aaagacctttattcttagattttcagatt**g****cg****t****ag****tt**cttctttgTTTTcaacttaagatt  
Tgccttctcgtgatcacaatgcaaaagatcttcgaattctgaaac**AaCACGT****Ga****T**gac  
gtgaaccCGAatagataatgattctctccatgcgtgcttggactgattagtaaactac  
aaaatatgattgacattttcatttcata**aaa****at****at****c**ataaatcatagt**ca****ac****cg****cg****g**aa  
accaaaccctattgaaacccaaaactccaagcttcaatctaaacgcaagatttacgcaaac  
atTTTTgtc**AaCACGT**tctcctactatgaag**t****ACC****a****ACT**tgataactctaacttcatcc  
tcaaatccatcgttcataaatagtcCAAatTTcgcAAatgcaaaacccaaacaaaaaata

#### At4g25470

tagaagtatttgcaatgcacgatatgtgaatggagaaaagacagaaagagcatttg**aaa**  
**tat****ct****cg****tt****ca****c**ggatcattatgtctaattattttaccatagaaaagcgacaattataa  
acaatttgttattcgtggaaaaataatTTtaataatgg**tt****gt****c****g****t****acc**ctataaactac  
agccacacattcatacaataagaagTTaaaaaattcataccctaaaggcatcaaccagt  
gaagggtcagaaacttccaagatgggtcaaaggacacatgtcagattctcagtgattga  
cagccttgataattacaaaaccgtgggatcgccttagctgtttcttat**ccacgt****gg**cattc  
acagagacagaa**a****CTCCGCT**tgcacccacaaatatccaatatctt**cg****g****ca**atata  
aacagcaagctctcactccaacattttctataacttcaaacacttacctgaattagaaaag  
aaagatagatagagaaataaatTTTTatcataccatacaaaaaaagacagagatcttct  
acttacttactctcataaaccttatccagtttcttgaaacagagtactcttctgatcaa

#### At4g25630

cagactacagaagaaaattatttatgagaacttgtaatgtaga**gt****gg****ac****ct****cg**tataaa  
ctaattatgtgggctTTTaccataaactatttatgaaaattattatggcccacaccacta  
taactaaagcccacatatttagcagcccagtttcattgtaagagacatgttcgctctgga  
actagaattttctggTTTTTgggtatttgTTTTcttatgtgtgtagagaaatgatggtaacg  
attaaatgTTgtgattacaattacaat**g****g****t****a****g****a****c****g**attaatatatttacacacaatt  
ttgTTgtgct**gt****AaCACGT**tagtgtgtgtgatgataaatttcataaagctTTaa**ct****AC**  
**Ga****GG****g****G**caaatgttaattctaaatagttgacagcagaaaaagatatgtatacataatat  
aaggattaaaacgtaataataataaataaggcgagTTaaattaaaaccctgttaaaacc  
ctagcttgaaacacatgtataaaaacacttgcgag**g****cg****c****ag****ct**tcatcgccatcgccattc  
tctctctcatcaaaagctTTTTctccttgattttcgcattcttttagagtcttaacgcaaag

### At4g33070

tcttgc**cg**tt**tgac**gctagcaattacacttcttcattgaaactttaaaagtgaacccaaa  
gaattaactcaataataactgatgagtatacaaattatgtttccggctaaaaacctgaa  
attaactcaaatttggaaatggg**gat**at**ta**taactttgt**tc**cc**ac**gtat**aa**caaattagtt  
cataattaagaggagaatcacaaaaataactgatgtattgatgttcaatltttggaaaatt  
aagatatttccaatggtaataatctggttacagccttactgggagtagtatgatactaaaa  
cagtaaattgcatttttag**CCGAC****TA**aaacaataattaagaagaagaatgtttgggtcaa  
tctcaaagtt**gat**at**ta**tttttttgcctttttgcacaagaaaacagaaacccaaaaaccac  
tagtcaaaaaaccacccatgtattcctcctagtctctaataccaacaactatataaaaacc  
tctcccattctcattttggttactcatcccaaaaaataaaaag**at**at**ct**ctcacacaca  
tacacaaacttgacagtttttaatttctctgttagtgaactcaaaccttcccatttcca

### At4g33550

aaatcacaaaaaatattcgacttttcacaagcatcggatgcatagttgtttatttgataa  
gggtatctcccatagctagttaaaaatgttatttaatatattcgttttggtaccatagc  
tacaataatcatattatgcagagatcatcgaataacatcacataaggtaagaaagttcat  
gtaaaaagaaaatgcactaataatcattcacaaacttagcagtagattagcgcacgaaaa  
ttgatgtcaccaaatttaacaatctttaaataatgacatctttaaataacgcggttcattc  
ggagacaaaatgaatttcatcaaaaatgagtcactaaactatltttcaaccactccacta  
aaaagttaaacctcattcaaaaactgccacgaaacatt**cc**acc**aa**caaaaagataacaa  
ataatatagactccctcgcttggttgcttcccactacaaaagtaacaagaaaaattgta  
caactaagcatagtattaacgttatgctatatatacaaatctctc**GT****CGG****ACC**aaata  
ttcgcatcatagatttctattacaaattaacgaactattcacagaaagaaataaaaacgag

### At4g33980

tttgatccatcatccatatatatgtatattctagaaaatgtaagaccaaaccttagagag  
gctcacacgaattctgggtctttctttacaaaaaaaaaaaaaaaaaataattcatgtgat  
cataccacttgctaaagaggcctcgtgtaaatctgatcttaatttaacttataaaaaatc  
tacaagtcaaaaaaaaaaacaacgaaataatgacataaaaagacaagaaacccaaaactacca  
aaataaaaaagagcatccattatctatatatcatcagaagttgacaaaagaaaagatcat  
ttttattttttatttaacacaacctcccttctccttgagctccaaaaa**aa**at**at**ctggct  
gata**ttt**gt**cg**gagat**at**ta**tt**tagcgaccagatgacgtggcaatactatgacacgtgta  
aaagcgacgccat**gt**gga**cct**tttgtctctctcttttttcttttctctctctctctct  
ctcattctctctctcttaagctctctctttggctctttcgaagaagaaccattttta  
tttcttaagagagacgacgcagttcttttctaaagcaccggagaggaggagaagcaacga

### At4g37260

ctgttccaatcataca**AaCACGT**aaatgttgtcaatltttttatacccaaactgta**ac**ga  
**gg**tttgtagctagcccatttatggacacataattatgaacatataaacaatggttaat**ca**  
**ac**gttttaaatataatcaaccaatattttttgactgaatgagtcaaaattgttta  
acgagtaacgaccataattatcagtttttattttttattgtttgaactaccatagttatc  
**cg**tt**ta**acactgagcaaatctctttattaatagagaaaacggttttatttgtttccttct  
ataaaattgtttttaataa**ac**gt**ta**gat**at**ttttatgcagtttaaggataatattacac  
tgtaaagtttaactagtttaatatcgtttctgttaaactcgataagaaaaaattacc**g**gt  
**ga**accgggtgacccttttgcccactcctttctcgtataaatactctctctcttctgctctta  
tctcttcaacccaaaagctttttcttcccaacacacacacaaaaaaaaaaaaactgtaacgacc  
aaaaaaaaagaggacgcggttagaagaaaaaaaagaacaatccgataaaaagatccgagc



tttctctctgcagttttcaaaaacttttctcactgttatctgcgtctcttttttggatcaa

**At5g52310**

tatttcatctacttcttttatcttctaccagtagaggaataaacaatatttagctccttt  
gtaaatacaaattaattttcgttcttgacatcattcaatttttaattttacgtataaaata  
aaagatcatacctattagaacgattaaggagaaatacaattcgaatgagaaggatgtgcc  
gtttgttataataaacagccaca**cgacg**taaacgtaaaatgaccacatgatgggccaata  
gacat**GGACCgACT**actaataatagtaagttacatttttaggatggaataaataatcata**CC**  
**GACaT**cagtttgaaagaaaagggaaaaaaagaaaaataataaaa**gatatactaCCGAC**  
a**T**gagttccaaaaagcaaaaaaaagatcaag**ccgac**acagaca**CGCG****AG**agagcaaaa  
tgactttgacgtcacaccacgaaaacagacgct**tcatacgt**gtccctttatctctctcag  
tctctctataaaacttagtgagaccctcctctgttttactcacaatatgcaaaactagaaa  
acaatcatcaggaataaagggtttgattacttctattggaaagaaaaaatctttggaaa

**At5g59820**

caaaccattcatatatgaagtattatt**attatatc**tagaagggtgttgatttttaaactatt  
ccgtata**aatatatc**tagaagacgg**CTcCGCG**cgtggggaatgcatcaaactcagagagtt  
taatagcttttttgggtgacgtcaactactcaaaagagtttagtttttgatgtgtatat  
atccaaat**aaaatatc**tttaaaaagaaaataataataaaatggtttcgagaaaacacg  
aggaagattctcatccaaccgaaacgactccttcgtttttagtagtctctta**agCTACGC**  
**GGtG**tcgcaaatcgtgaccacataaccggttttttccttcttttacccttatctttcca  
cgtatttacgttaatacctacactcttcgctgccacttcttaccaccaagtcaaaagg  
gtatattcgtcactttccacacgctctttgggtccacacaaactcggtatctatatatagtt  
cccaaacggacacgaacacatcatcacaactactatcacaccaactcaaaaaacacaaa  
ccacaagaggatcatttcattttttattgtttcgttttaatcatcatcatcagaagaaaa

**At5g66390**

aagctgtttctcaatgattttgtcattatctageggtttattatgtctttggcgtactcta  
t**caaccg**tatctatttggttaagcacacaatggttaattagtttgcttgagaataattagc  
attttttttgactatttggtcaacgggtcaaccaagtaaaaccctatggatgtaattggt  
tt**gcgtagct**taatcatcttcaggctgatctctcaatttaataaaacataaatcccata  
gaaatctt**CTCCGCGT**gactattaaaagcaaaattgtgctttaagtgttgctaatgcat  
ggaacaaaaatcccacacaacaactgcaataatctattgatatgaggtgcataaagtga  
tcatacatgagaaatatacgaaaagaattctaacaatcttgattcataccaattcaaa  
tatcaatgtatccatctaataccaatatatagctaaaattagat**ACCaACTc**ca**acgt**ctt  
tctcaattgtccacaaagtctactctataaatgcaacccttggcatcacacacaatcacc  
aagtacaagtaaccgagttatatacaacgagtcacaaagagaagaat**cccccc**aaaaaa
