# Supplementary material
Source: PubMed Central journal article supplement (PMC1203392)
Supplement: plntphys_pp.104.058412_7.pdf [file plntphys_pp.104.058412_7.pdf]

## Motif map of CBF overexpression (CBFox) class

Significant motifs from CBFox genes were mapped on their promoters (600 bp 5' upstream from putative ATG).

### Legend:

p<10<sup>-5</sup>    acgt  
p<10<sup>-6</sup>    acgt  
p<10<sup>-7</sup>    ACGT  
p<10<sup>-9</sup>    ACGT

### At1g01470

tgggctta**tgccctgt**ggcccatTTAAGTTTgaccttaatatccatcagaaaccataacc  
aatacgggtcataagtgcattgtccatatagtgtaccgcaatgcatgggagtactactac  
att**ccACCGACgT**gcatatggggggacatg**GTCGGTc**cattaat**cccttgcg**catccttat  
tccttacgcgaataacttttccctcttttagttttgtataatactttccatttttttggtat  
ttaaatttatcgtgtgactatctaaaaaggtatTTAATTatctagtttagctataactgc  
aaacaaaatatctatTTTcatgaatgatataTTTTTgaaataaaatattgTTgtcatgta  
acgaaaaaatcaaaaatcaagcagaagacacgtataaccacgctttcactctcactcgt  
ggaaaaccctcacacgtacacaaaccattataaaatttaaccatttac**AtCgACCGACT**  
**TcA**taagaacatcgtaatcccatccgttatataatattccaagttaaacttcatatca  
tacacacaaacctaaaacaccgaaacaaaaacaaagagatttaacaagaagagttatta

### At1g04570

gtgacaagtcataatcaaaaatcagatgactcatcattttccaattttcctaggacagtgg  
atTTTcatatggacccttaaaaaataaatataTTAATAAATatctaaaagctTTTgta  
accgTTgattaacttaaaaactcattagaagcttgattattagtggaagacagacaa  
cctTTgtacttaaaatacctTTTatgagttTTgtctgcctctaatttactcTTTgctacac  
gcttctagatccctcctcctcgtcaaaaatctcattTTTcTTTTTctTgTTgatattga  
gaaatgacttaatcctatTTcgtctcctcctcaattcaacgatgcttagggTTTgccc  
aaaattatataaaactcgtcgatacatacaaagcttgTgactagaattcgTTTctTcaaga  
gtaaagctTcctcctTTTctcctcctcgtTTTcatctcctgaaacaatggaaagaatta  
tgataaatccattgTTatcaattcaaaaactcccaaccaagttctTgaaaccaccactTT  
cgtccattcacaggcaacaacaacaagaga**ggcagagc**aaataacaataccctTTTca

### At1g05170

tatagtaagtaaaaaaaaaactccaaatataaaagcgaattTTTgTTTTgTTTTtagtgacat  
aatgcgTTTTgTTTTatcatagttatgTTtaatttactagcattattaatcggtaa**cggt**  
**tcaca**aataaagagatggTggtaactaggtaaattatattTggTgaaatactatatgaca  
aaaaaaaaaggTTaatacatagtagtattTgataagaggacattTTTggTaaatatctca  
aaatattggtcagTTTattaataggaactagagagacggttaagaagtcgTTctgattt  
cgtTTTTctTctg**TaAGTCG**TTTctcctccaattTTTTTgTTTTcctgCGaaaatc  
aaagagactaacacagagagcttattcaattTTTcTTTcgatctgtgaaatctcagattTT  
gattTggaaagTTgTggagattTcagctgTTctTTTTgTTgTTgggTctattTctgggT  
TctTcGagctgatttatagagTTTggTctcCGatgatagagctaatctgctTgagata  
gctactgattgagagTTTctTgaggatcTTTattTTTTcTTTacatctTgTgaggaaaa

### At1g08890

tgagtgggcttttagggtttggctcttctctatatgtataggctactaagattgattgtga  
tttgtagacttttagatcacacggattgCcaACGTGgcagatcatctaccctttcaatta  
ttatgtgatctatggttcgtacatctccttttactttttgaaaataatgtacaaacgaaa  
agtgatttttagtgaaatagtcctccattattaagctttctataattttagaccctgaatc  
ttgatctgtttacaagttcatattttaatttacatcaatacattttattgtggattgatca  
tcccaatgtattgatggttatttaaagaatggccagggttgatcgattcggtttcatatg  
attttagttctatgatgtaacctttattgatcaagcaacaagaataaatcaataatttat  
acgataGCCGACaTAAagagatttctattatcttactatatatagtcaacaaatatctat  
aacagttgttcacatgggacacgaccaatgagtcactgccaaatacaagcttcaagagtg  
aagactattaaagaacagagaaaacagggaaaagcaattaggagaaggaaacaaaagaag

### At1g09350

actataacattttggcttttggccagttaacaaaaagaaaaagaaaaaaaagtttagaa  
atattaaaattatgacgttaggacaaaagaagaaaatatcaaatttatagaaaacaacca  
ctacataaatagTAGGTCGGCCatggGTCCGCaCaataatagattacttaacaattaacgag  
cagcaaattagctttgggtatagtaacaaccaatcaatgttccctcagcttcttcttctgt  
gggctccatttaggccaactggcattatcacagccttgattgaattcaacggagatcct  
tcaaccaatcacgagatctcgttagcgtggtagggccctctctcgttaaacacatgggg  
tagtatctaaagTgGaCCTGtcacactgcatcgccatgcatcatttccgggcatcttcaa  
cttaatacgaacttacgaagctttcccCGGTgGaTaatcaaccgttttattaattagcca  
taatcagggcctcaagcctatataagttgtttctcaccaacaatcaaatcacttatcaa  
caactcaaaactgatcatcacaagaagaaagagttttctctgataatctttctcggacaag

### At1g10080

agtgcagtgggtctattttggagaacaattgagtttaattagattctaataattaattgtgtc  
actttctattttagaatgagacggagaggatgtgtcaggctataaaacatgtttctcctg  
atthaagttgtaatccgagtttgaagtcatgcgtcctttgTgGaCCTGcagccacaaatt  
cttttcaaatcatctcgaacgagacagacagtgcaaaaggattggagcttggtgagttga  
ctttgactacgacagaggaagtaaggaattattttctactttgataggatgaactttgtgtc  
gtacatgatataggcatagtggtgggttttacctgttgcatgtcttcacagttttacagc  
tgaaactggagaattgactctttgttctttactgagatacaaatgagcttttagaggta  
aactgagacttaggggaaccacaaaaataactacaatgagacgtaaatggaccttgaatt  
agtgatacaaaagagctttttgtttaaaacctttaaaagctagatctaaaaggaatatac  
tccattcatgactgcatttgtaaacattgcttaatgaagtatcagcgcctgaaatatgta

### At1g10760

gtgctcgaataacgatgtgccaACGtGGTggaatcgaaggataaagtgtcgttttttactt  
cgattaCACGTgaGtgatgtatgtgtgagtgagtgagaagaacaaagagcgaagaac  
ccccagcactcacttcatccataagatcattcaaatctgggatcttctctctttctct  
cattgtattcagtttcttctcgtctcggttcgatcatcaggtatctttttcaattgaatttt  
accttcaatttcgattgctttcgggtgtttttgttatttgattcaaatgcaaattttctt  
ttgatagatattttcgttttgactataaaagacgattcttttcttcttagtgatattgc  
acatgttccattcgcagaatgaagtaactgtttctctacaaagtgaaaataaaaataaaaa  
taacaagtgtggttctcttcttaactctgtcagattcttctttttgagacaaatagtat  
aactgttcttttttttctcatctattgcaaaagcttattgttttcttattatctta  
ttatataatctctactttacttaacagatccggcaagtttgattcagtgacaagaagca

### At1g20440

tgcacacatcaaattcaaattccaacaactacatacatatgccaagtccattga  
aactctttaattatacatctgttatccttttaaatctgataaaatgcaatacaataa  
gattaaaaggatgtacttca**ACC****CGT**aaccatagaccattgattaatccaaaacaaaac  
catagaccatagttcagatacagcttctgttgataaaaagtacatgactatgcgattatcta  
atattagtttaactcttcatctatatattaaaaacataatcgtttaattaagaaaaa  
gtggtgatactgatatcatgatattc**AtC****ACCGACT****TCA**agaaataagaggggtcatta  
tacaattcaagaaataaataatccatctttttggatcatttttaaaaataattaatcttta  
cagcgttac**ctccgcgTtGgCCTG**gacccttctcttgacactataaaaaccccactctct  
cttatctcatcacaacattactcattcacaacacatcttaagcaactacacaagtct  
tgaattttctcatattttctatttactatataaacttttaaatcaaatcaagattaacta

### At1g20450

gtttatatttcaacatagtagtgcgaaacttaaatcgtgagaatgacacaaccactaatt  
caaaccactacattatataattctaattcattcaaattcattaattatacattatataatca  
tatctatataatgttataatatacaatcaaacaataaattagaaggaagtacatgcaac  
caaacttccatagctctcccgtgaactaaaagtacattactatgcaaatatctaataa  
gttaactctatatcaatataattaaaaacataaataccttaaatagaaaaaatatgggggt  
gatttcattgatattc**AtC****ACCGACCGACCGACgTAA**aagaaaatgggttcactctgca  
acttaagaaatagtaaactcctttgccataatttaaaaaactaatgaaatctttaacag  
cgtgtgac**ctccgcgTtGgCCTG**gaccctctacttcacacactataaagtcccactcatc  
acaacaatattcatcacacagctcttgaaaacatcttaagcaactcaaagctcaaatc  
gaaatttctagtttctctttatcattcacgctaagtgttcaatcgaatcaagattaagta

### At1g43160

aaagagac**cACCGAC**gaatcattttgggttcacaaaattgtacttcgatttctaagcctg  
aatgtgaacgcacgttttgaaatatttcaacacgtgttccatatttcattacatgcat  
taacataaataattacatctttgagctttaaactagtt**gaccaac**aaaaaaaaaaaaacttta  
actaagtctagctagttttgttactacatatataaaaaacaaaaccgaaataaataatttaa  
aatttataatataatttggtggtgctaaatcaatcaacgtgtcatgaaggctcaattcaagt  
tggttaaggaaatcttttgttatgtccattt**Cc****ACGTG**tactatttg**TAtG****CGGC**ta  
gagaaagacatggtgaattaactagtactccgattatataagcaagcatctactaaaa  
agataggaacaacacaatttgattacactgagcaacacaaaactggcgaa**Cc****ACGTG**ac  
tctaacgaagaaaccggcaat**ggccag**tactacaatgccgaagaaataacaagaatc  
ataaacgagccagaatattatc**cccggt**tacaacttgtctaccaccgcaatttcaaac

### At1g46768

ttttaaccatcattaacatctctacttgaatcaaatttaaccgagaagtactggaccaa  
aaccacaccacttgattaataggagagcatctaactcaagataacattttgtattagttt  
at**gTgG****CCTG**tgataccaacattcaagtctctgtcataccaaaacacgggtatttgtct  
taataagcaacttaggaataatataatgaaacaatcatcatctatgaaaataaaatattta  
tcaagagtttgaattattgaatcaaatatttacaagggttgatcattttctaaaagttct  
tgatttgatataaactgagttttcgtgattgtttttataatttttgtaagccatctgat  
ctcgatgaatcttcagtattcaatt**caGTCGGT**ctcctaaccatccatgacaaattcag  
tgataatagtaaatagataacaagtgagacgt**ACG****AGGT**tacttggctatttctacaa  
aaccaatat**TTA****tGTCGGCC**atagttctatattaatattgtcaccatacttaataaact

tccattgcccacccaaaagtttgtcttttatcaatggaaagagaacaagaagagtctacga

#### At1g47710

taaaaaacatctgtatcagttctttttcaaaggcgaaatttaaaaacaaaaaatatttg  
ggaaaactaaatttaaaggatatctacaaaacaaaattgtccatctattttattttcttg  
taaattagtc aaatgtaggtttttcaaaaaaaaaattaagtcttattttacccttattttat  
ttataattaaaaaaaaattataatttttctaatttattttatacaaaaaaaaaatagtaatttt  
aagtaaaatttttaagaatctaaatcctctaaatgtataagagtttttcaaaccctattt  
tttgtctctctttctttctttactcggtttaaaaaaaaaaacattcagctctataaaaaaa  
ttcataacgaaatagtcataacgaaattttttcatatgccaccagatagtc aaataccat  
tgACCGACgTgctagaagaaaaaaaataaaaaaatttgACCGACaTgtcatttataatct  
ttgtattttaattattattatataatttttaagatattttctctaaaataaatatataatcaatcg  
tcttctcctaaaccagcaaatcgtttaccagtcataccaccacaacctccggcgaaa

#### At1g60470

tttgtcttgatattttttaattctaccgttttgttttcactttaactattaaattttctt  
ctacattttggttattgtcaaccaaatacgggtccataatcgaaatctacggaacatatata  
cacaaaagaaaaataaattgtgaacatgaattcaagttatactatcagttttaaaggt  
ttaaattcatgaactataaataaaaaataaatctttgcaatcttctctagatacatcaag  
aacttctctaaagctatatttgactttttcatttcggttagttacatcacccatggaaaaaa  
gccaaaggtttaattttcatatctgaaaagtaaaacttatataaaaaatgcaattaatag  
aagaacaatatcgaaaaagaaaagttattcataattaatttgttccggatttaccttc  
gcgctacgcctatttaatacaacggttggttagccttcgtagaaactactcacaagccaa  
agaccaaagtaactaaaaagtttacaagtcacaaactggttcttttacttctcaaacac  
tcaagaaaacttttcagttatcttctataacctaccccaataactttttctttgctcaaaa

#### At1g62570

agtttctgtaggaatctggttctatttctcctctgcaacctccagtcctctcatgaatctg  
gttcggattctctttttccttggttctatataatttagatacatgggttttataattctat  
catatgtctattttggatatagtattttaaaaatataatatttttcataaatgggtatg  
gtctatttctatgtaaatgataatcatttagtctttttgtcaactatgttttttttccaac  
aaatttagtatgtaaaccttttttttaaccggtttttattaaatcGaCGGTGaTcagatc  
aactccggtataacacacataagtttcggttatcaaaaacaaaaacaaaaacagatttttt  
tttgtcaactaccagtgaaagattagtCttACGTGtcaagaaaccggataaaaaatataaa  
cgtattttgggcaatcagctaaagatattaactaacggggagttcattattaaaatggagta  
atgatgttttcagttttctatataaaaTcAcGTCGagaccgtagagtccttacacaacaatc  
cttcttacatttctaccaacacaaaaacacaaaacacaaacatagcattcaaaactttgaaaa

#### At1g64890

ctgtagtttgggtgggttcatttttaattgccatttataaggtaatgaggagatttcgctg  
atatgtgttgggattattgctttatttgccagagttttaaggctcaattaacacaaaact  
acacaaaattttaaactatagacggattagtcacaagattttatttgggtgaaaatcacgt  
ggacaaaatacgattgtctttatattgggtctaaatatacctgttttttggttattttaatttaa  
ttagccttgaaatagttctgtctgggatgaaatttacggtgtgtcaaaaacaaaaatccgt  
gccaaaaagatccaaactaaccagatttgagttctgttttaataagatggaaataatcg  
ctcattatataataatctcaccacaaccagaactaatccaggtggatcaaaaatataattt  
tgatacaagaccaaatcacaaaattcttccaagaaatggtattttgTAAtGTCGGTAcacaaa



cttaaacgacacgtgtacgctcatgatttattaatgcacacgtaatcgatcctctgacaa  
aaaccataacgaatacagaaaacacacgaatacacttccctgcgctataaataagctagc  
acgaaaaaatttaacagatagagacaagacaagcaaagcaacactttcactaatcctcta

### At2g23120

atatcttcacaattaattataaatgcccgtcctctgattttctcaccaattaaagaaga  
atcactaaattaacatggttctagtctcaaaaaaaaaaacatgtaatagtctcaaggatg  
ttctaaatgaaaaggctcaataaaaccaataatgaatcatcaciaaagctatgtcaacg  
aagacaaaatgcaagtgtggatatttttcagaaactgctgtaaaacaccgtgaaaatcatc  
ttcttcttttttttttttttttgggtcaaactctctacagagtttatcaagtgatttttaccg  
gtacctgtttttccttgtttgggtcaactcaattattcgccttaaaccactttaagaaa  
agcccactgaaaagcctacttttaaattcaaccaaaggcccataagtacta**CaGCCGAC**  
**aTcAG**cagacaacaag**ccacgtcg**atctcgagga**ACCgCGT**aattaacgt**gtcggaa**tca  
cacg**AgCcACCGtgt**actagatagctccataaaagcagacacatctcatgaagcagaacc  
taaacctttaatagcaaacgaaaaataaaaaagaagaactaacaaaacaaaaaaaaaaa

### At2g24260

aaaaatgaaaacaacattttattttacaacaacaaaacaaatcattaaactacatgaaaac  
acaaaaataataaaattgctaaacaataaatggtatctaagaaaactataattgtataca  
aaagctagctattacacttagcaccatataaataaacttcttatccatcaatgtttaata  
tatattttgtatagtaaaaataaaactagtttgcatctgaaaaagtataatcaataaaact  
ctttagatagcaatatgtacattaaaaaaagacttattttcatacgtattaagctgtaaa  
aaataatgattaagatttggggtaagagaaaaccaaagtt**TAaGaCGG**aaacgaaacaaa  
agatgataatcatcgattcatcatcacgatataatattgggttgctaaccacaatagaaaa  
acaaaagtcttttaaggttttaataatatatcaccaaaaatgataattaaacctaata  
ttaaaataatataatctacaagactacaacaattctgctttataataaagctataaacctc  
aacatttttcaacctcttccccaaaaaaaagtgtagaagcagaagaacccatcatcatca

### At2g24560

attggagaagttgaaggaagactcatggtgtgtggcttcagagagtgatgccaaaaatac  
gagaactagacagaccggtgagtgatatcaattgttttactcttcgacacagacaaatgg  
gaaacacgcttaccatcatatattcatataccttttactcaaatgaaatgtgaaacctga  
tctccaagactccatttttcagcaacttctggggccaagtttttgtatcagacgcatccc  
aatatgataagtttcaactcccaagtatgtgggtcttttctagcatatataattggatttat  
ctaagaaaactatacactaaaaatgggttagcaaaaaataacactttgctttaagtatta  
actt**agggtcc**cttttttaaaccttgccttaggtaacatattctctattcagtcgtaaaaa  
tctttattaataactataaccggcttttggtttttatttttcagcaaaaaaaaaacacaaac  
acacacacacatttaatcagaaatccagcaaggtccaacaagaagaaaaaacacaatcaa  
aattccttataaattaatcaaaacactagctagacagtagacacaatacaaatcaaacta

### At2g28900

**ACGtGGT**tcttctaagcggctctgagaagaagagcaggaaacgtcatcacaggaaagagcg  
agagtaggaaatcgatctatatgagccattttcactctccatttctctcttatcaatggt  
atgtacaataatgaaacatgctctttgtatggttgatttgatttggtgaaacatgtctt  
tgtattttcactctccatactctgggttgggtctgtttggttcaagcttgtgttataacac  
tattgagatacttgggtgtaatttgggtctttttactctattccattat**TTAaGTCGGCa**  
**ag**ttagagc**TcAaGTCGGCa**agtgctcgttgtaagagatcacgagact**gtgggttg**gat

ttttggcatggctctagcctaggaggacaatgtcgtcatttaactggctcattgctcaat  
acatatctcgtcgtgggtccttgtaaatctcttctccaccggtgaaccatagtttaa  
AtCcACCGttaaaagcccctttatatcccaagaaataggtgaacttgttacagaacaagc  
aaagatcaaagagaaaaatatcccaaaacaaaaacagaggaagaagaagaaga

#### At2g41870

ttagattcattttatgatGCtGACaTACGTGactcagtttgccgggaatgtttaactaat  
caaataatggccaagtagacatcaatcttttttaagcgacatgtgtattatcttgttttcg  
tggtagggctctgaacttgccgacactcgtcttaatattttagtttctcccctaaaaaaa  
ttgtctcgtttgtttgtctcttttagaaattaccgatttacgctgaaaaaatgtgaaaaat  
acaatcgatcgacattatctttatccctagctaatcattcatgtacaagcatgtctccgaa  
ggttaaaagcagtcgctatttaccggaccacagtagtttctcgaagtgggtgtccggtg  
tcatattttaaatttatcaccttcttgagaattccacatttttatcctttttgtcatgta  
gtgtatatttttctcctaactaattaaaatcaaaacaaaatcctttgacccaatttagc  
ttcgcgatataatcagaagagatcaaactactttgatcagaccatgatcttcttcttctc  
ttcttcttcttcttcttcttcttttagacgatcacaattcctaaccctatttctcagatta

#### At2g42530

gtgagtttttggttttggttatttaacattggagatttaggttcttagaaatataatctat  
atactatttagtagtttaactacagtttgacttaattgaaaaaatgttaaaagtgtttt  
aacctagcctaattgctaataaatgactaaatagacatacacaaagacttgtacattttcag  
cttaacgactaatacatttttctttatataatctctatcgagtctagttattaatg  
ttgaaagttgcaataaaaacagaaatgctaacaatgtaaatatcgtagccaaaaatgctaa  
catgtgtataacggttataaccacaacttgatGGCCGACcTcttttttcttttggttaacc  
atagaaatgggttacacgtaactagtagaaccaacgaaaactcttcttattcagatagtta  
aagataatagcaatgcgcaaaaatatctagcactCacACGTGtagttttggattctcatt  
ggtcgagagatctataaaaacgatactattggaggttagatttttctcactctcactttctc  
catcttaaaactctttcttgtattttttcctcccaaaaacatctttaagagtccctca

#### At2g43620

acgcatgactatttggaaattgcaataattgagttggatttttctaattttggttgattt  
tgatttataaatagaaacattttggcttcactagtcatttttctcacaattccatacaat  
ttttgttaaaaatcaaagtaagactttaaaagaacggttctaaatgctatattagttgacc  
aaaaaaaatgctatatttagctaacaatatcgtttgagcctaattaacaaaacttggact  
attcaatagaaaaatctcaaacgtttgaactaatctaaacttgattatctcaatcaagtt  
tttatgagaatgattttcatccaagtaacttggctctttaaattttgattacatattcg  
tttttgatctgatctatgACCGACaTggaaatttctcataacgacaagagaaaaaactgtg  
tcattgacttttgtaagtggtaaaaagtggcattgactttgactcagaaaaagccaatc  
aataatcgtgaaagatgtctaactgatcaatatttcaatttgaatagaccaatttac  
actataaatacatcaacacaccttctcatttcttcacacaacaccctccatacaca

#### At3g47380

ttacaaatgatataatctatacgtatatttttttttcaaacacataaagcgaataaa  
aatgaacattttgttaatttggtgactgatgggtgatgctaaaatgtttcattcatattgga  
atggagatgtaaaataagtatacgttgaaatgccataattccttggaaatgaatcgatga  
taaagatcaacctgttttcattataacaacaatacaaaaaggttaaaccatgttcacacca  
aaagtcatttctgatgatcatttacgaaaaatcctagatattcgtttgttattttgttct

tttcattcccatgttactttttgggtcaagaagaagaatgaatataattgccatagtac  
attcttaataacttaattagcagacaattctgggtattttccaactaataatctagacctcag  
ttggaaaaacaaataatcaaccaaagcgtcaaagtc aaagcatatcaattattctattat  
tataaaccttaagaaaaaccaaagctacaccaaagagtagtactagtccactataaaaa  
ctcaaaaccaactctttacctctccacaatatattctaaaccaaacaattttcaaaagaa

#### At3g50970

atcttttaacacccaaaaatctgaaacaacagcatgaaaaaagcattaggattcagagata  
aatgagagctaaagcttcaaaatcatacctttttcaattccttctctgatgccaagaagaa  
aaataaaaaaacacagcttgagaaatcgaaatcaaagcttttttcttcttactaaca  
atctcaaaaaatcaaagatgaacaacaagggtggaagaacataccaacgacatcgtt  
ttttagtttagtaaaagatagcattattgggcctttcatatctaaaggccaCAGGcCc  
AtataagttaaaaTTAcGTCGGTcGcTaaaccactactacACCGACgTcttacttgccatg  
tgtgtgtgactcttaataatcaattacgaattgaatataattacttttacgAtGTCGGCCaaca  
cgtattgagtaaaatatctatgtgatgatgaattcctatccaaaatgaaatttgcatctc  
tataaaagtatcattcaagagatcattaatcttcatcgatcaaagctctgaaatatttcat  
ctatatatacctaagaaagaaaagagttaaagaagtataattttcgattcaaagaagaaaa

#### At3g50980

tttaagtatttgtgtggtgtaataatgatgatgtggcttttctttcattgagtcgctaa  
ataatataatgtaagtgatggatctttgaattaataaaaaatctacttctggtttcgtt  
tatttatctttctatcgcttcaactattccatgttattaaaatacttggtgagttgtgaca  
catacaACCACGTataattcacatgtaattatttggtaattcaattctttacaagtttat  
atgttcttttgcatacaagttatcaggggAaCgACCGcagttgtttggcaatgtatatta  
ctcaggttttcaattCAGGcCcAtacggcccaaataagttgtttttacggatcgcagtt  
aaaagaggtgtgtcgattataacggacatgtgtcacactaacacaaaaccaacgctcta  
cgtaatcgCACGTgtGtcacttcaacgcaatttgataataatcataatactatagtga  
ttatgatccctatccaaagttgcggttctataaaaaataccattcaagagcgtatacatct  
ttatccatcagtgcttaattttgtctatagctaaaaaagggttcaattgtaaaaggaat

#### At3g55610

caattttgccacaaatttttagttagtgaattagtgctattgcgatgagttttgaaattttt  
gatactaagaataattaaggtatataataaacactttacagacaaaaaatcaataaaa  
taaccacaacagatttctgatacattttctatataggcacaataccatatacattataatc  
tttgtatttttagtcataagtaacacaaaataaattgtttacatggtagttggcaatcatt  
tgctaagAaCaACCGACaacaataatcacacaagacaaaatgcagacaattctcaaat  
ccacaaaaaaaaaactatagacgttatctattgataattggaatctttaacataaaccac  
tatgattaggacttaaagttagtttttaacaacttgggtatttacttgatgattacaa  
agattaaggacttatttgactattttgacaagttgtcctacgctcttaaaaaccgttcg  
cttctcacagtagaatctctccacaccgattatccaatattctCACGTCcGCttctt  
ccttcaactgaGtCCGACTaagttgactcgttctctcgtgttttcgatagacacaaacta

#### At4g04020

aatttttaatgggtcttctttgttaataaaggccattaaatatactatcCAGGcCcAtt  
tagtccaactacttattacactgttgattaatcgccgtttagatattttgcattggagag  
aatcttcaccgttcagaaaactgaagatcgaagatcaccacaaaacggccaaaaggtatag  
taCACGTccGaagattctagatccatcatgccattttgcattgcatggcctaactctcgta



gaaaacccaaacaaatttctccccacacaaataatgggacaaaaaccaaattaaccaa  
ttgtttccctattgaagaaaataaaatcttccacaaattttatgaatttttca**TAAAGTC**  
**GGC**aacttcacacgagtc**CAGG**t**Cg**AAttcttaaaacaatgatctttaacatccacgtgt  
caaatcccaccttagcttacctcatttgttctattccaaatacctatttctatcccttgg  
atcttgacttatatgttcataagaaagtgtaccagataagggtatatacgtcatttacag  
tccagctcaacggttataaaatcctaattcgtgaggtttctctgaagaacaaacacaaaa

#### **At4g12470**

taatttatgcattaaagaatcttaattaaattcataaacattacatatatattaatcata  
tattatatacatatcacaaattttcgagtaagtttctaataactttgggtgtgtcctcat  
**ggccgggctca**gcttgattataactacactaggaatttattatattac**TCGACCTGA**cgt  
atagaag**gccgtca**agtaaaagagctacgaaccaagataaatctgaatatcttgtgcatcc  
acgaactcatgatgggtgttgataataacagcattgacaacttgacattaataacttatatg  
aatgcacgtatatataaagtatthttcttaattttaaaatggtttacaaaaacaaaatcc  
aaataatttcaaggttctacgtacctagctacatgcatataggaaaaatggtcagaattt  
atatatatatatatatatacaaaataattacaaatatctataaaataaattttaaact  
aatcaag**ttggtc**ctcttcccatccttctaaaatcctataaaataccaacatcttctctt  
catatctatttattcaataacccttacaacaccgaatataactttgaaaaaaaaaaciaa

#### **At4g15910**

gttatcatcattcagatct**cACCGAC****T**cttctgatcttttgtaccaagtatacttggt  
tattcgcagatctttttagacttttcaccttttaactgccagtatcgttttagtggaag  
acgtacattgggttttacgtcttctatttctttcaattcaatcatcaaacatcaaaagca  
tcaaactatcatagctttctcactagtcacttgtgggtttctcgaacacaggcaaaaaca  
taaataaaaccccccaaaaaatgaattagccatttactattttcacatttcagttttaa  
accttactttggcagtaagtatgagca**gtgggtc**cacagtaaggcccatgagcccaaatt  
tctctgtcgtgggtctatataagtgcgctaaacccaaaccctaaagtctctcgaaaaacca  
tcaccggggaatc**tgAcGgCGGC**ttagtagcggggtactgcaaaaaggattgtgttct  
tcttaggcttgatacttgccctgggaagaatataacaatcattttg**CGGTaGcT**aaaacg  
ctaagctctatcgtcatatctttatcattgatacttatttgatatctaaatatcataaaa

#### **At4g17550**

cagcaaactctcagtt**actcggga**gaaaaatggaggggaagacagtggaagagccttatct  
gcttttcgcttccatthtttgga**CACGT**atGccat**CgCACGTG**Gaatthttctttatggg  
ccgthttgttatt**gtgggect**tttagtatataatataaaatagatagtactatgat  
ttataaaaatatcaataaaag**agtcggc**taatgacacagtccttattatgattacataaac  
ctataatttgggcccacc**ACCACGTCGGTcgtgtggg**c**cg**tcgcttcatgctgaccaaag  
tggtcaccgtggcatgacaactgthtt**gttctgccc**ttttggct**ctaccg**taacaaataggac  
acgtgtcgcgtcttcacagt**TtAtGTCG**tgthttctatctctctctctctctctctct  
cgcaatatctctctccctttggctctctctctctaatcgctctctctcaatcaaattaa  
ttcgtgattctgatttatcaaacactaaaacaaatggatttgggtatttcatthttgatcc  
gtaaggttgattctthtttttttggttatcattgaaaattttgtthttgtgtgagaga

#### **At4g21570**

g**ACCACGT**tt**G**tgactccatta**atGgCGGTC**ca**t**gctccctcaattcttcatgatctaa  
ctactaagagatctgattcactthttcacact**ctccgag**ttctcatcttcgcttcttccc  
tagctcttatctggttagttcctctctthttctctctctctggttagctaattthttgctthgt

tcagatttacagagatTTTTgcttatctagctttgaatcagtcttgggaacatagacaaaa  
tcagaattcgacctttcaaattaatgggtctgattgggtttatcgagttcatcaccggtt  
ttcccagtcactataaaagtttgagtttttaattcgggtatatactctgttttgatcgg  
agatatctaattgctccaaccatttagctttctagatctcatgagatgtttgcttttcat  
tgtacagtttaaatatgttaagctaaagagtgaatTTTgatgtggagctatTTggctg  
aatataatgctgaaacatttTgtgaagatttagatgTTTgattgattagaattcTtTgtgca  
aagTctgatggcttctTgatgctaaagagttatgtgtattaattTTTgatgcaggacacaa

#### At4g23600

aataaaatttagtattaactattacgtcacattaaaatatacttgttttaaaattaaata  
taaatttatgcatgacacggataacctTgtaaagataataacaacgagtaaTcatgaaa  
tcgtacgttactatTTTtatTTTTaaatgggcaaaacataacaaaaaacatgggtgggtt  
ttcctcctctc**GTCGGT**cg aagacagagacaaaaaatattTaaatacgtagaatctTtg  
cttcttcttgatgctgatgagtgatgagtaatcgacagagttatTTTgTTTctTTTgtat  
aataaaggagattgCGactctacaagagagggctaataTtagcatgcattaagatcaatca  
tacagTTTactTaaacaagattTaaagatcaccgaaggctcgagattcgagatacattatt  
ttctTTTgtcttctatgtTgatgtTaatat**CoCACGTG**aGatatacaaatgtTtagaaca  
atgtgaaaaccattggcaaaaaaatgaaaagtggTtgggaattTTcactatatattcgac  
ttcgtagcaatgagagtttagtcacccaaaaacaaaatctaatagagaaaaataagtagat

#### At5g15970

cgggaggttcggcaaacacacacattTtaacttgccaaacgtagcatctaactatcccacct  
tctacaaggcaccatTTTTTTTTcaataataaagTTTTTTTTctTTaatttcttcgcaa  
gaagagcagaaatgTTTgccaaacgcatatgcaacaa**ccccacgt**tacataTTTctatt  
tgtagctatagagcaagctatattgTtaaaaactaaaaagaaaatctTtactataacata  
tagatagaggattcgagatatctTgaaagactcaacttaataaa**TaAaGTCG**aaaagaaa  
**aca**cgga**g**gcgag**agga****cc**acactcgacagaaagagtctcatatcctctataacaaa  
ttgataaaactaaactaaaacgacacgtgatgctTgat**cgcc**aataaaaa**AgCtACCGAC**  
**aTA**aggcaaaaatgatcgtaccattaaacgtaaat**ccACGTGGT**ttcagattacacgtggc  
accacacaagtatctccattTggcctataaataaaacccttaagcccacatatcttctc  
aatccatcacaaacaaaacacacatcaaaaacgattTTTacaagaaaaaatatctgaaaa

#### At5g52300

atgatgatgaagaagagaacgaatTTTgaaattggcggTTTTgaatTTTtaagaaattaa  
aaaatat**ccc**cg**tc**gatttcaagaggggagatggagataccaaagcaactctcgccactt  
gtcgtctTTTtaattTTaattgagTactgtatgCcgTTTTaaatgTtcaaaacagcacaca  
gTtgatagctgaattgattTTTTctTTTgCcgTTTTgTtatattTaaacaacacacagtg  
cattTgccaataactacatgatgggccaataaacgtg**gACCGACT**aaactaaataata  
gaagatacatcgataggcttctctaaagatcggataaaaaga**TaAtGTCG**catag**cca**cg**t**  
**ag**agagcaactggctgagacgtgg**CAGG**a**Cg**Aaa**cgga**cg**cat**Cgt**ACGTG**tcagaatcc  
tacagaagTaaagagacagaagccagagagaggtg**gTcggcca**tatgtcatcgTtctct  
ctataaaactTTatggaaactTgttctgattTTTctcagagacacgaaaagaaagaaacaa  
cactagaacaaagagggTTTgattgattcactTgaaaaagagaaaaacacagctTTggaaa

#### At5g52310

tatttcatctacttctTTTtatcttctaccagtagaggaataaacaatatttagctcctt  
gtaaatacaaatTaatTTTcgTtctTgacatcattcaattTTTaatTTTtacgtataaaata

aaagatcatacctattagaacgattaaggagaaatacaattcgaatgagaaggatgtgcc  
gtttgttataataaacagccaca**CGACgTA**acgtaaaatgaccacatgatgggccaata  
gacatg**gACCGACT**actaataatagtaagttacattttaggatggaataaatatcat**ACC**  
**GACaTcA**gtttgaaagaaaagggaaaaaaagaaaaataaataaaagatata**ctACCGAC**  
**aTgA**gttcacaaaaagcaaaaaaaaaagatcaag**ccgaca**cagacacgcgtagagagcaaaa  
tgactttgacgtcacaccacgaaaacagacgctt**CatACGTG**tccctttatctctctcag  
tctctctataaaacttagtgagaccctcctctgttttactcacaatatgcaaactagaaa  
acaatcatcaggaataaagggtttgattacttctattggaaagaaaaaatctttggaaa
